# Supplementary material
Source: PubMed Central journal article supplement (PMC9756396)
Supplement: NIHMS1787072-supplement-1787072_Sup_Info.pdf [file NIHMS1787072-supplement-1787072_Sup_Info.pdf]

# Supplementary Figures

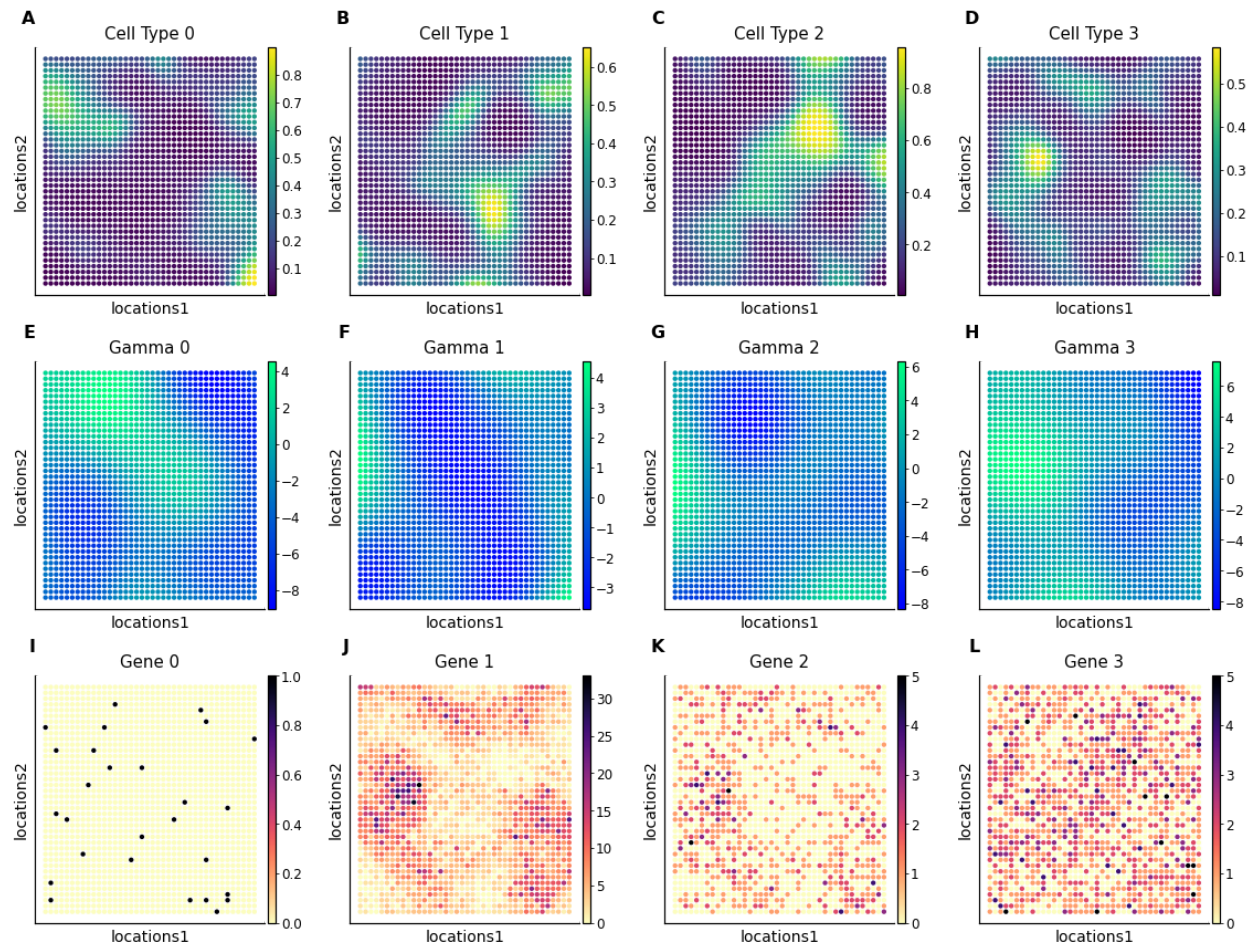

**Supplementary Figure 1.** Presentation of the simulated spatial data (each point is a spot, placed according to its spatial coordinates). **(A-D)** Simulated cell-type proportions (four out of the five cell types). **(E-H)** Simulated cell-type-specific cell states (the four dimensions for one cell type) **(I-L)** Simulated gene expression at each spot (four out of the two thousand genes).

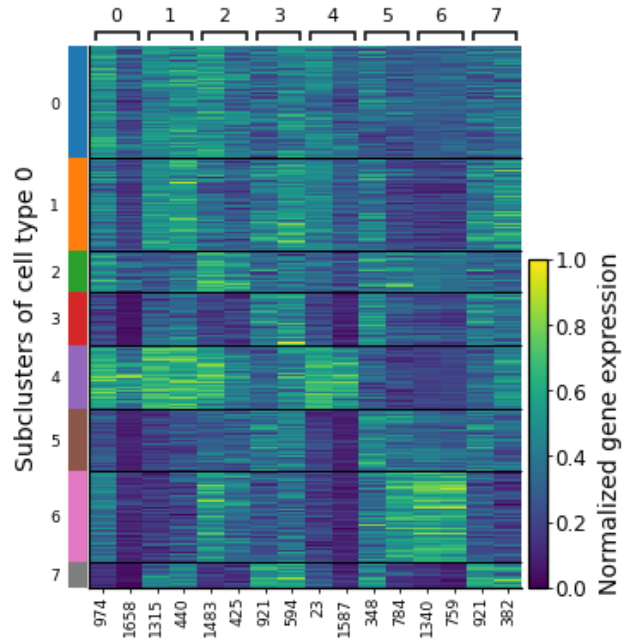

**Supplementary Figure 2.** Heatmap presenting the Intra-cell type variability in cell type a particular cell type of the simulation (cell type 0). Each row represents a cell, each column represents a gene. Cells are organized into sub-clusters as used for the benchmarking. For each sub-cluster, we obtained two marker genes from differential expression with scanpy on the gene expression counts (wilcoxon). Each entry denotes the intensity of gene expression (normalized counts on the gene level).

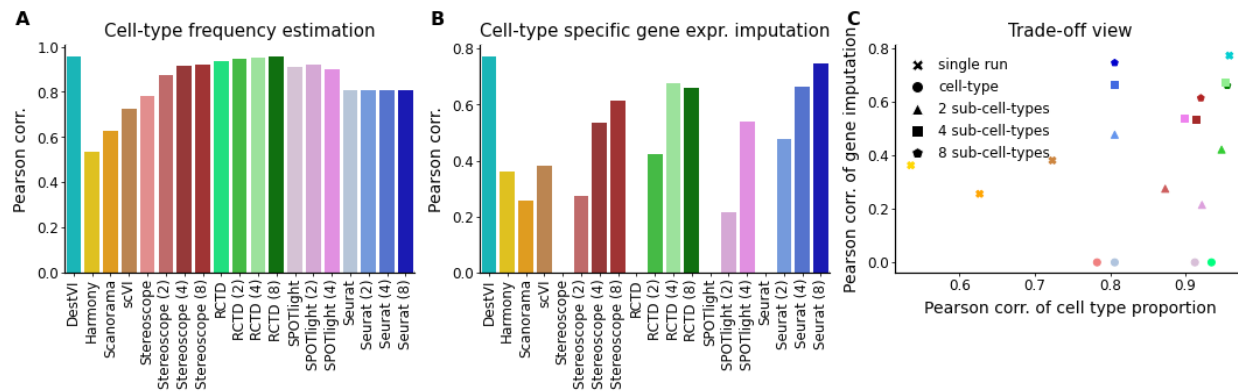

**Supplementary Figure 3.** Comparison of DestVI to competing algorithms, possibly applied to different clustering resolutions, using an alternate correlation metric. **(A)** Pearson correlation of estimated cell-type proportions compared to ground truth for several algorithms. **(B)** Pearson correlation of estimated cell-type-specific gene expression compared to ground truth for several algorithms **(C)** Scatter plot of both metrics.

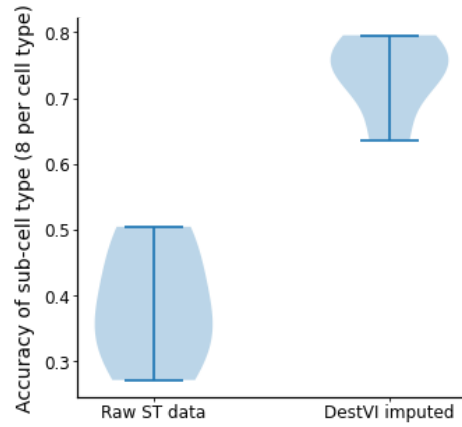

**Supplementary Figure 4.** Comparison of DestVI to a simple hierarchical method, based on a classifier. Each point of the violin plot is a cell type, and designates the accuracy of a random forest learned per cell type on the single-cell data and applied to either the raw ST data or the DestVI imputed counts for every cell type.

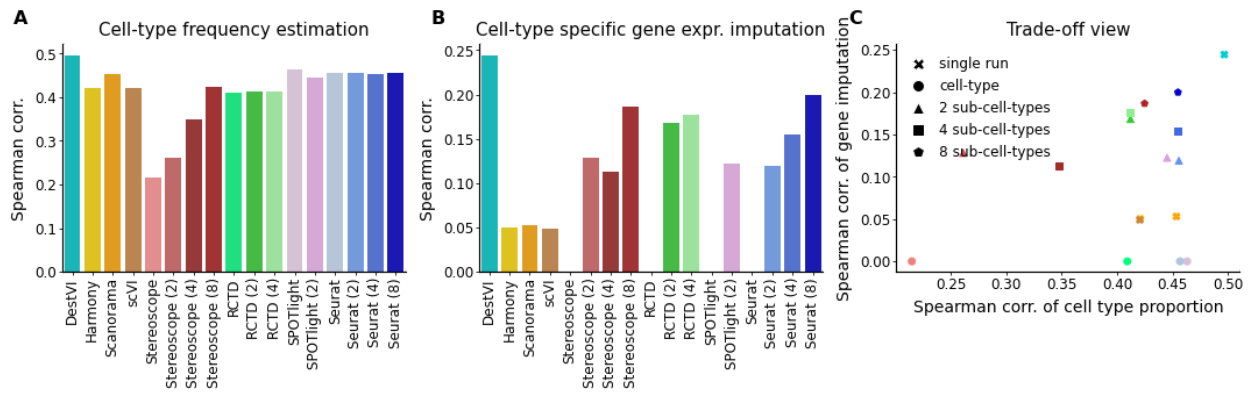

**Supplementary Figure 5.** Comparison of DestVI to competing algorithms on the single-cell spatial transcriptomics embryo data, possibly applied to different clustering resolutions. **(A)** Spearman correlation of estimated cell-type proportions compared to ground truth for several algorithms. **(B)** Spearman correlation of estimated cell-type-specific gene expression compared to ground truth for several algorithms **(C)** Scatter plot of both Spearman correlation metrics.

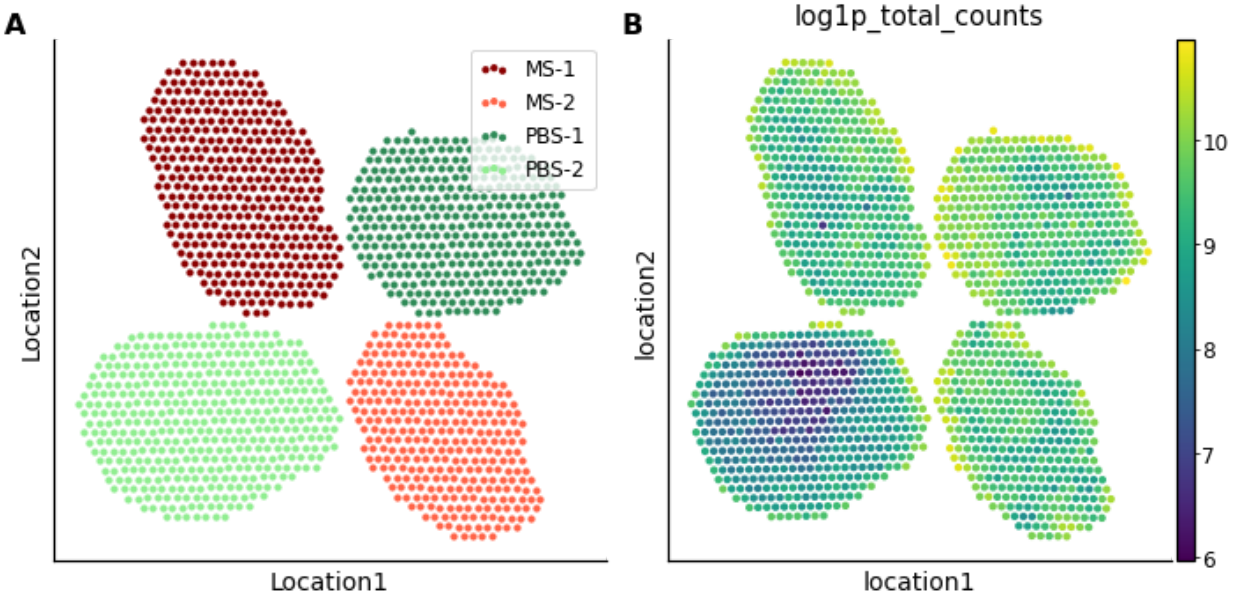

**Supplementary Figure 6.** Quality control metrics in the lymph node spatial transcriptomics data. **(A)** The four lymph node sections initially processed with 10x Visium. **(B)** The log library size as processed by scanpy on all lymph nodes, displayed based on their spatial location. The PBS-2 lymph node sample has a significantly lower number of detected UMIs per spot (magnitude of  $\exp(4)$ ; 55x less).

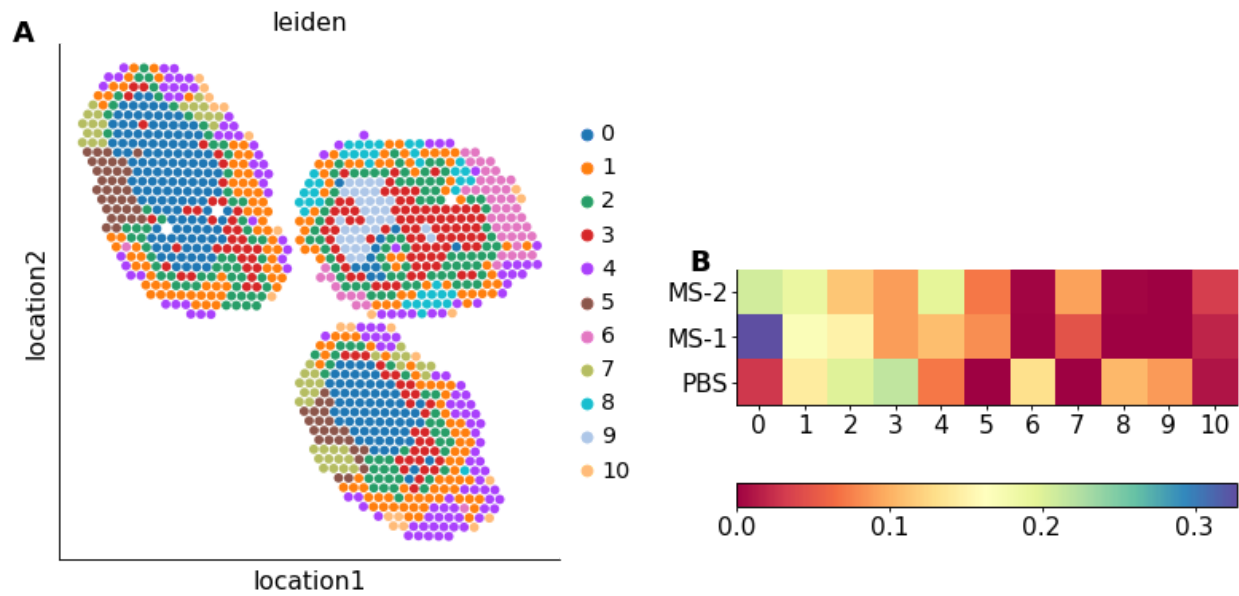

**Supplementary Figure 7.** Simple comparative analysis of the spatial lymph node data based on scanpy. **(A)** Clustering analysis: we normalized the spot counts, and proceeded to leiden clustering after principal component analysis. **(B)** Comparison of the proportion of cluster abundance across spots of the different lymph nodes.

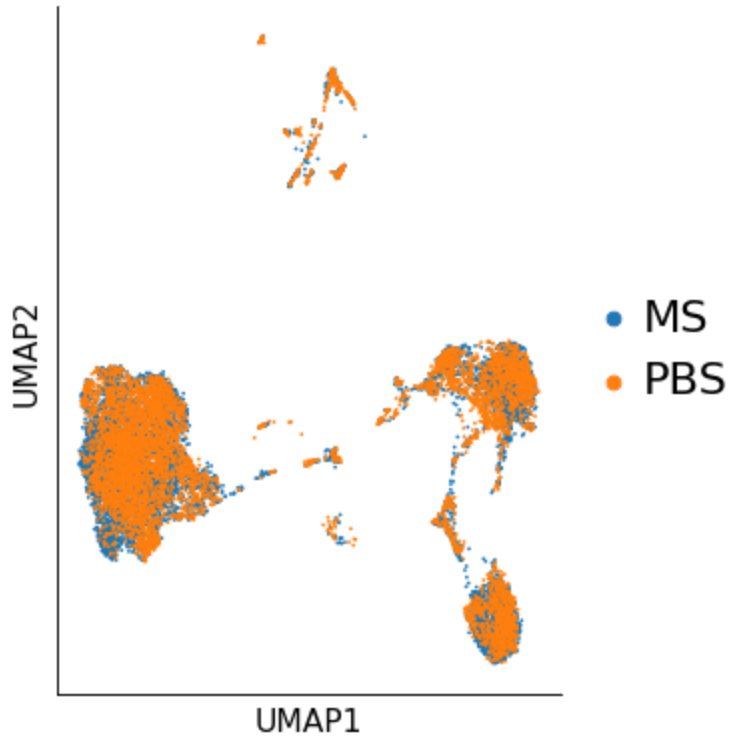

**Supplementary Figure 8.** Two-dimensional projection by UMAP, as embedded by scVI of the lymph node single-cell RNA sequencing data.



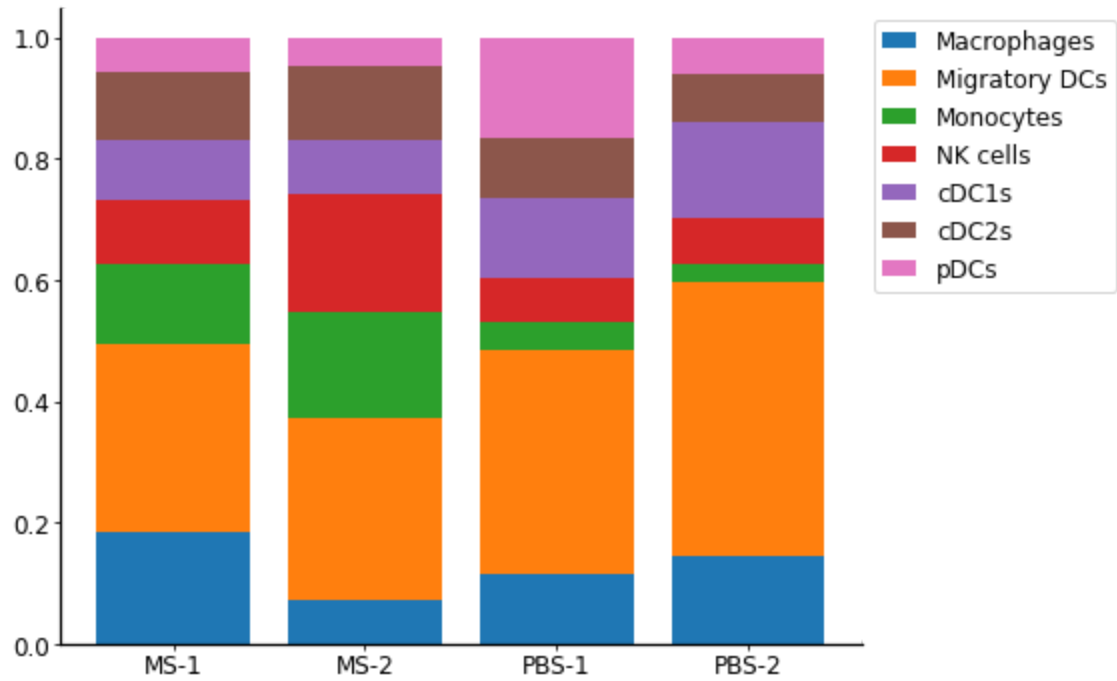

**Supplementary Figure 9.** Summary statistics of the cell type proportion for the annotated lymph node single-cell RNA sequencing data, for each lymph node. We excluded T cells and B cells from this analysis, as they represent most of the cells in the tissue, but we are more interested in myeloid cells.

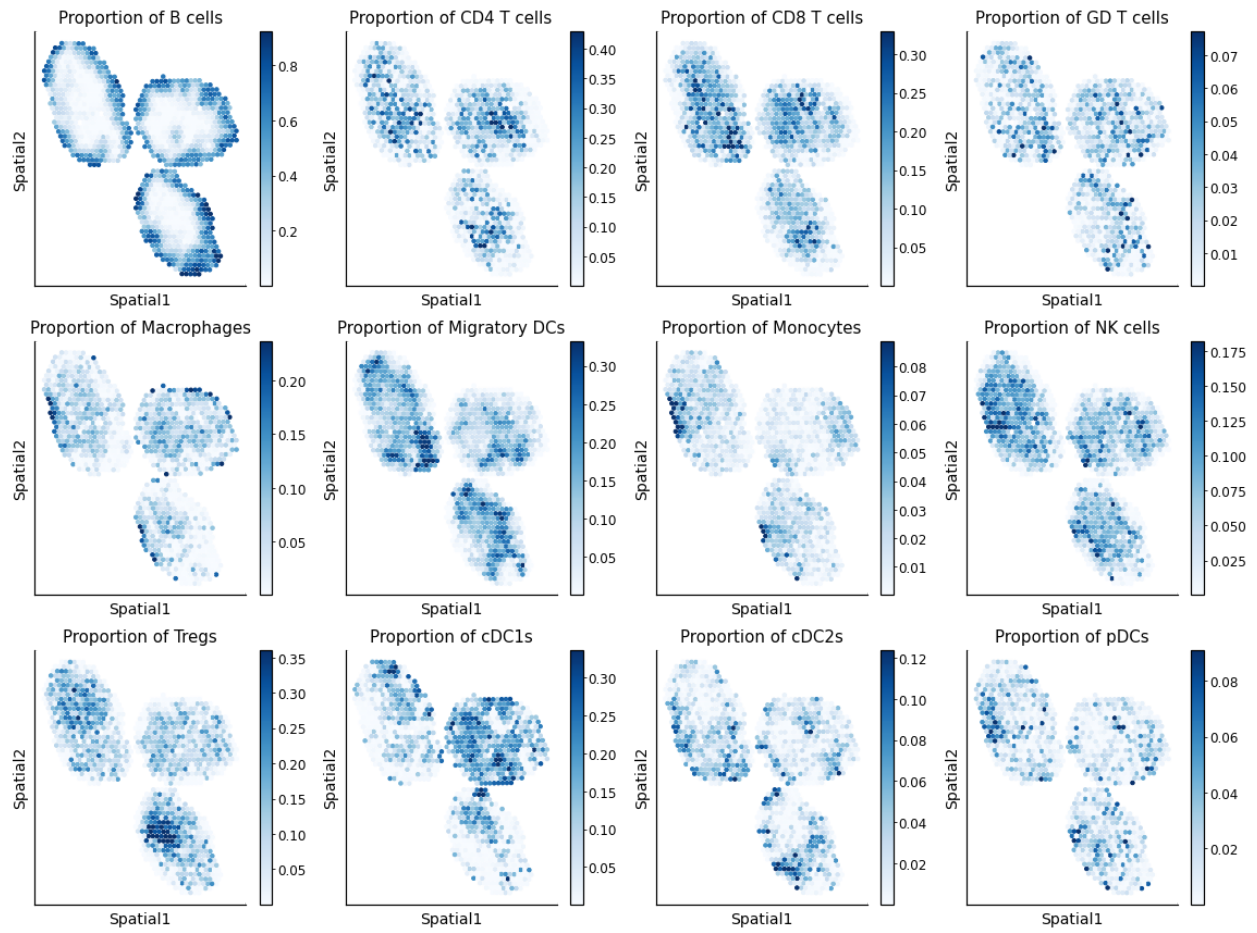

**Supplementary Figure 10.** Abundance of all cell types across all spots for the lymph node spatial transcriptomics data.

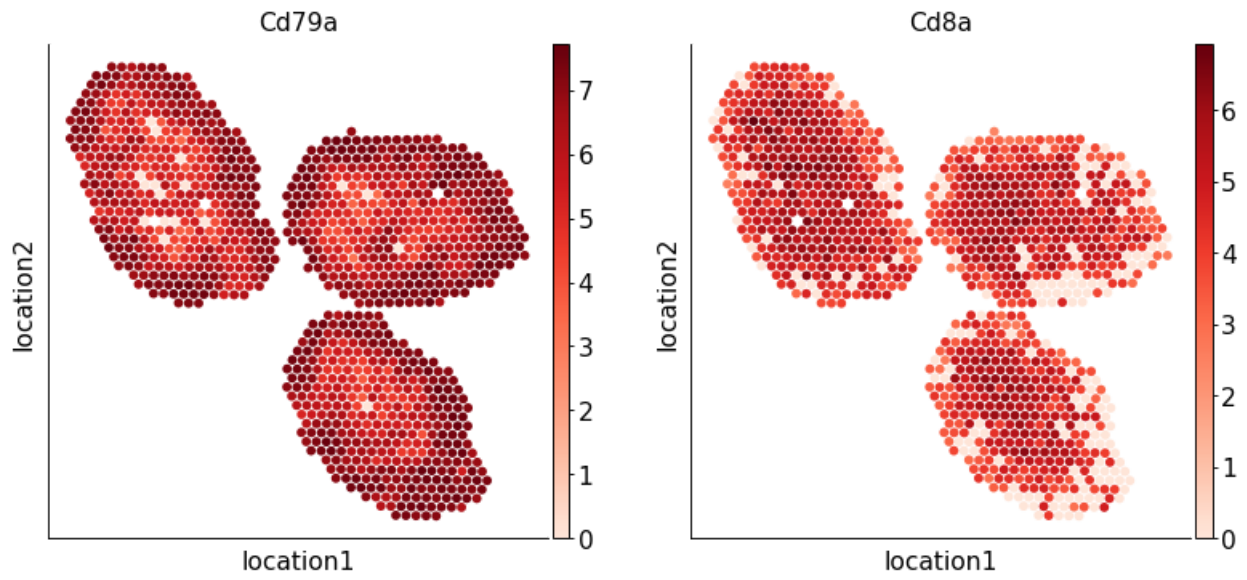

**Supplementary Figure 11.** Expression of key marker genes for the definition of the T cell compartment and the B cell area.

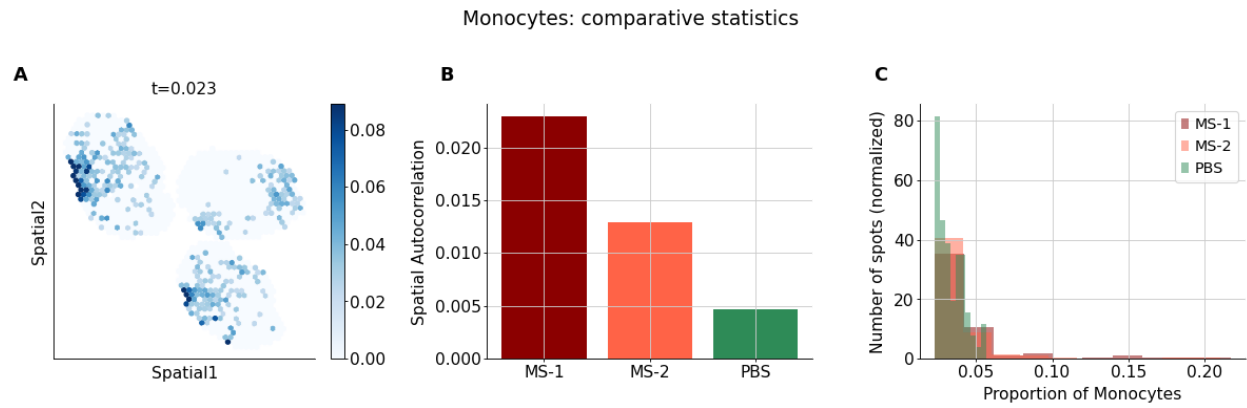

**Supplementary Figure 12.** Follow up analyses for the proportion of monocytes. **(A)** spatial distribution for the proportion of cell type, thresholded according to the characteristic point method (**Online Methods**) **(B)** Autocorrelation metric of the cell-type proportion per lymph node (Geary C) **(C)** histogram of thresholded proportions across all spots, per lymph node.

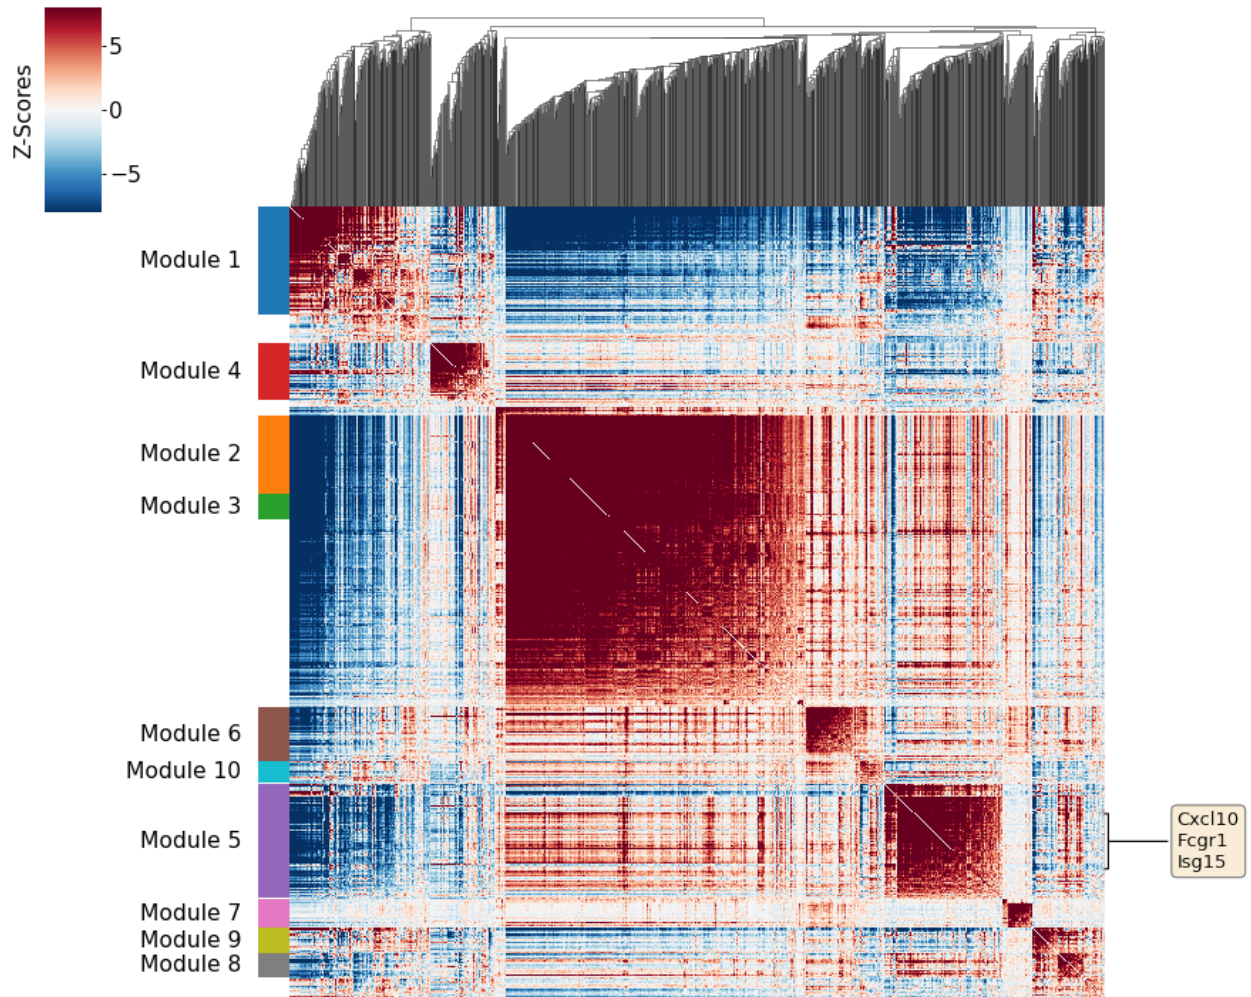

**Supplementary Figure 13.** Hotspot analysis for the monocytes: gene-gene local autocorrelation matrix, and clustering into gene modules, based on the scRNA-seq data.

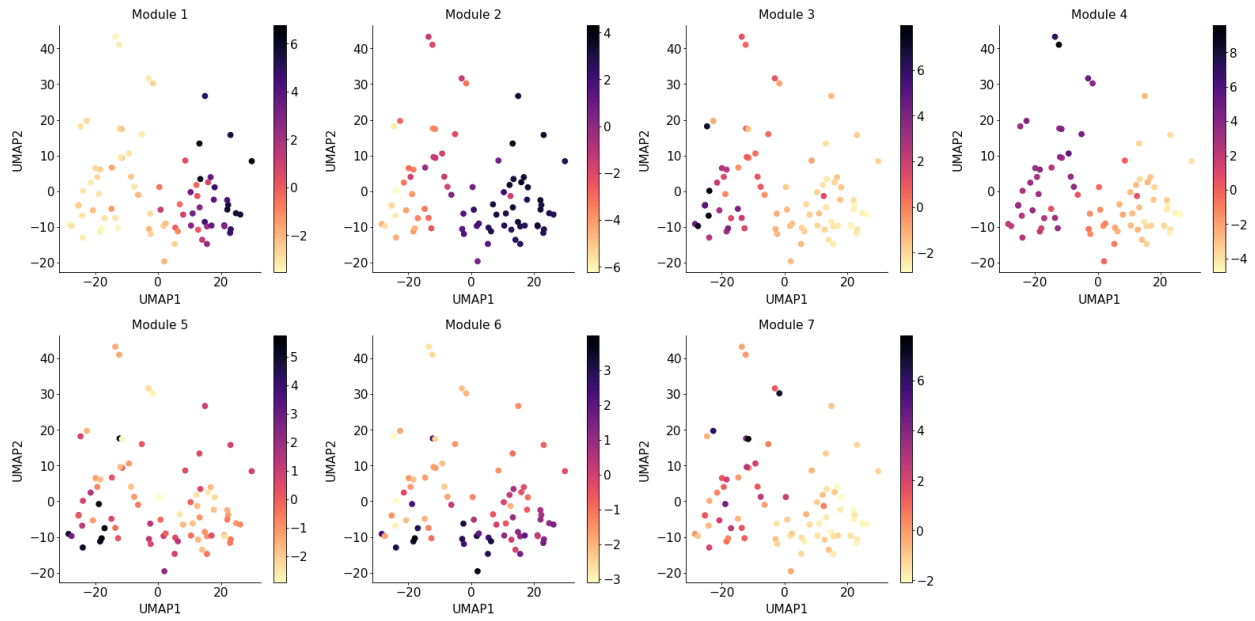

**Supplementary Figure 14.** Hotspot analysis for the monocytes: projection of every gene module onto the embedding of the single-cell data (scLVM).

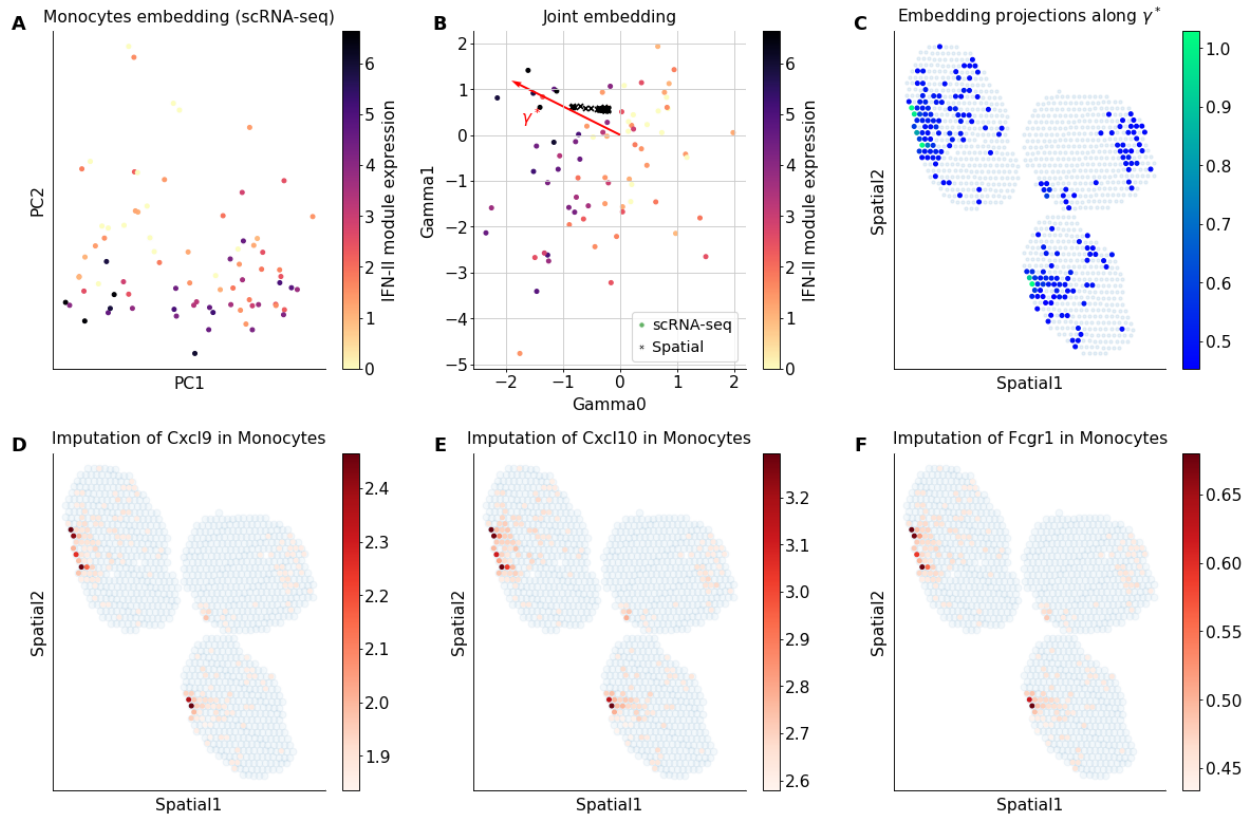

**Supplementary Figure 15.** Follow up analyses for the monocytes **(A)** Embedding of the monocytes from single-cell data, colored by expression of the selected IFN-II genes identified by Hotspot (Fcgr1, Cxcl9 and Cxcl10). **(B)** Joint embedding of the monocytes from the scRNA-seq data (circles) and the spots with high abundance of monocytes from the spatial transcriptomics data (crosses). Single-cell data is colored by normalized expression of the IFN-II marker genes. The arrow designates an interesting direction  $\gamma^*$ , drawn by eye-sight. **(C)** Spatial data colored by the projection of the embedding from DestVI for every spot along the direction  $\gamma^*$ . **(D-F)** Imputation of monocyte-specific expression of several marker genes for the spatial data

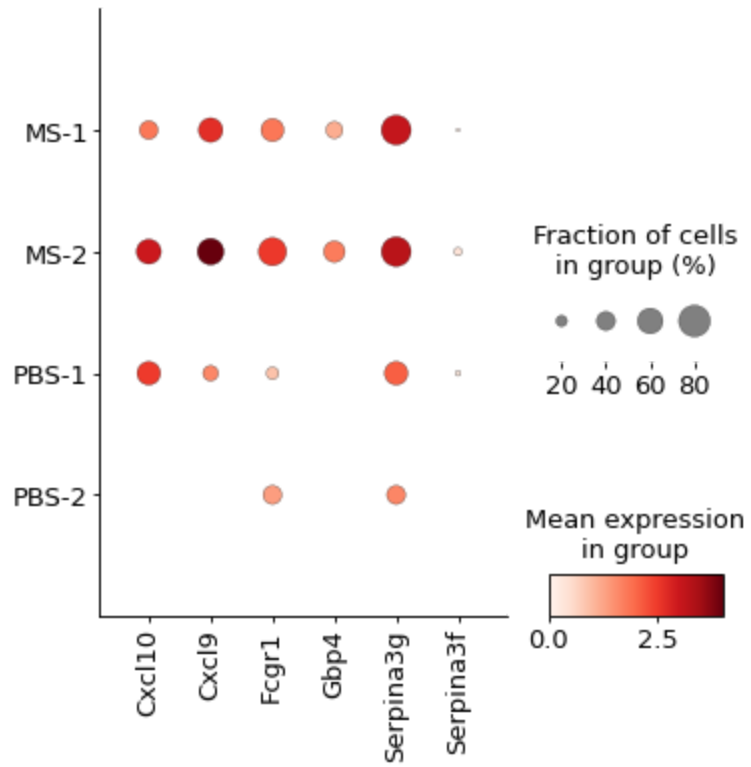

**Supplementary Figure 16.** Comparative analysis of gene expression for the monocytes of the scRNA-seq data.



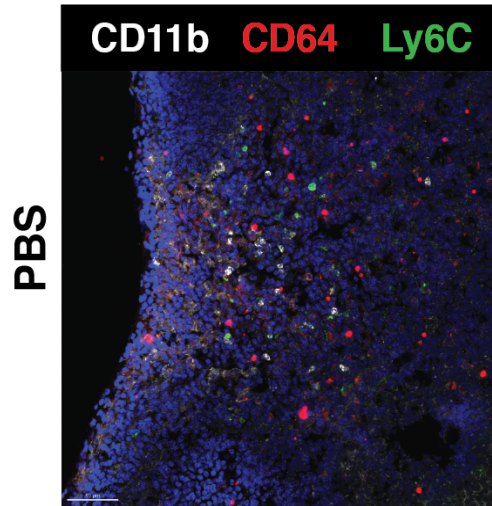

**Supplementary Figure 17.** Immunofluorescence imaging from a PBS lymph node. Scale bar, 50  $\mu\text{m}$ .

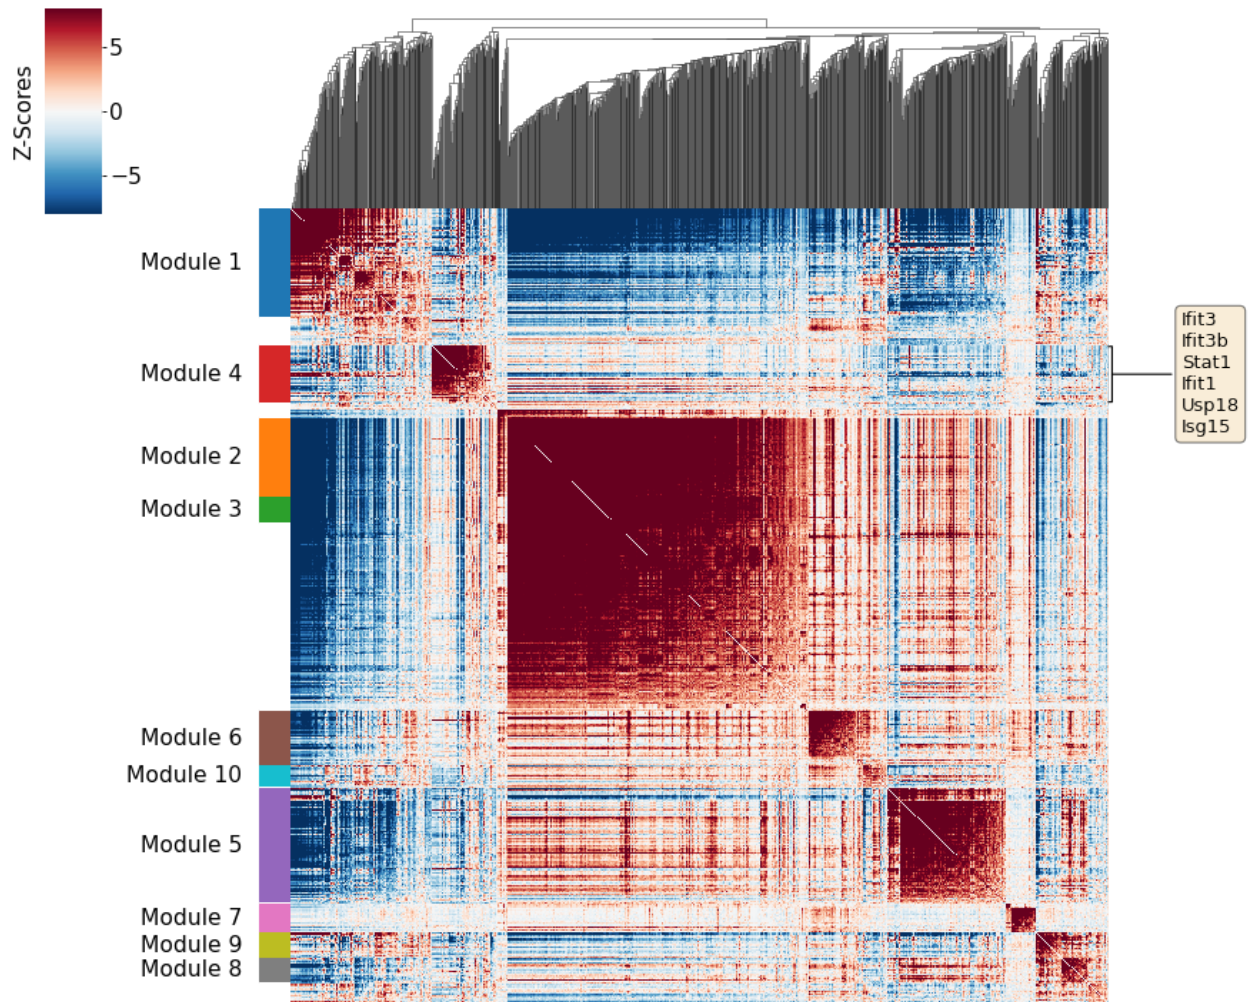

**Supplementary Figure 18.** Hotspot analysis for the B cells: gene-gene local autocorrelation matrix, and clustering into gene modules, based on the scRNA-seq data.

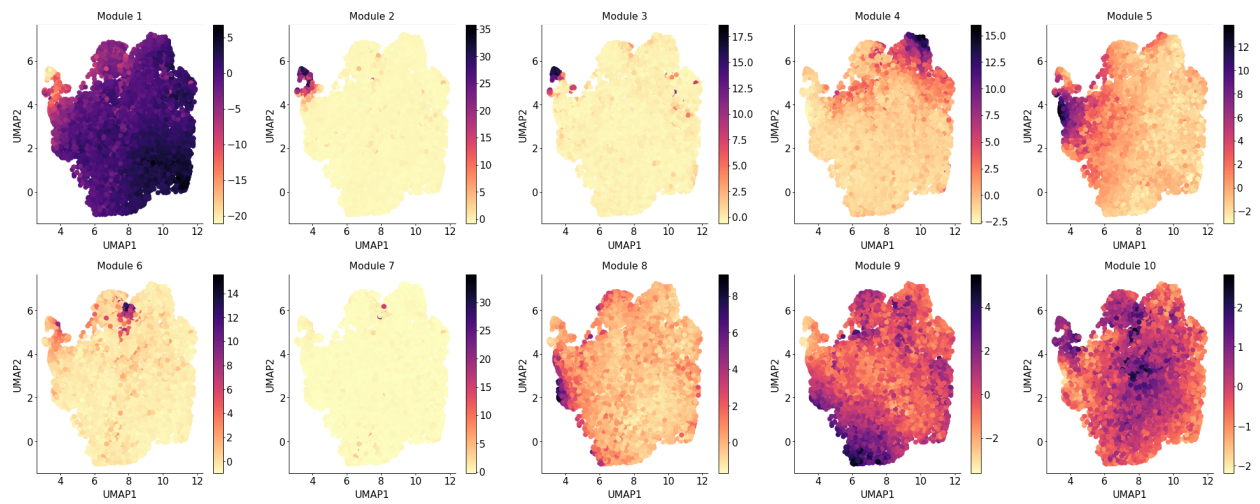

**Supplementary Figure 19.** Hotspot analysis for the B cells: projection of every gene module onto the embedding of the single-cell data (sLVM).

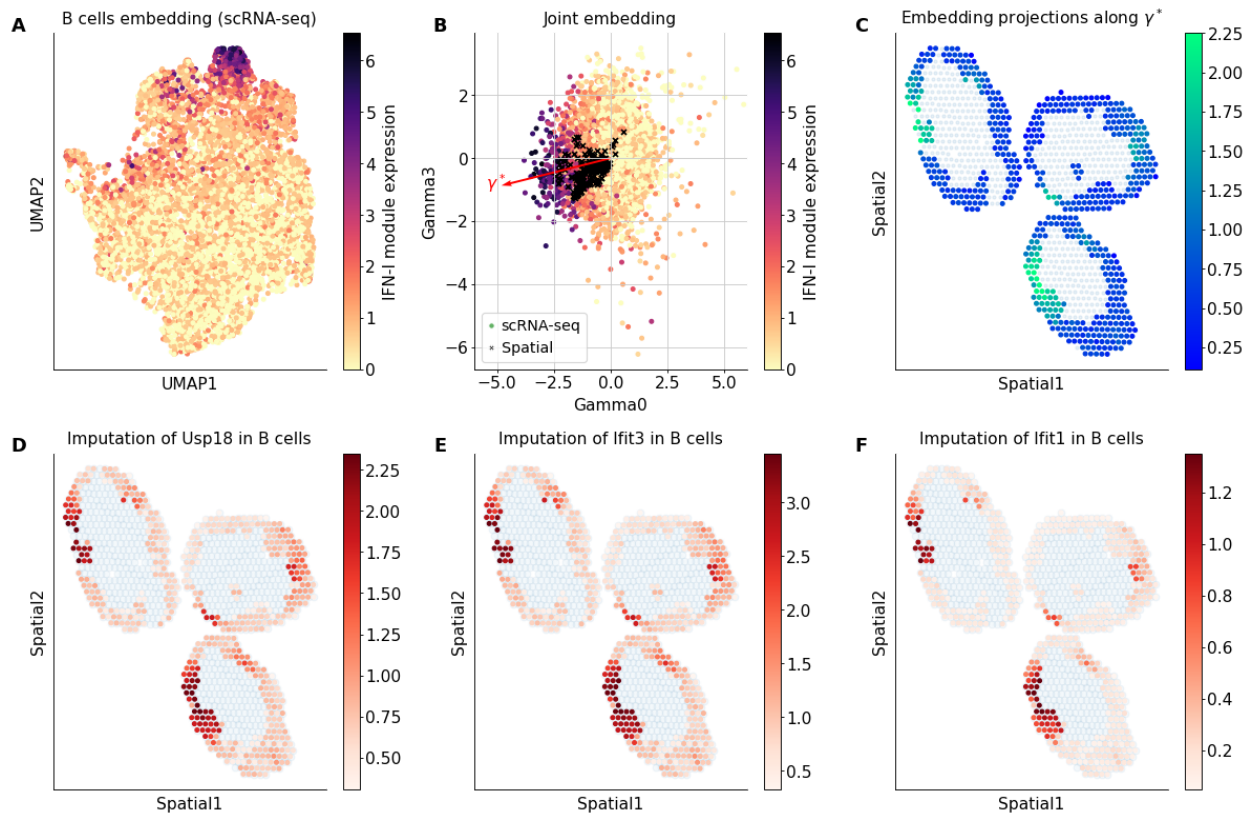

**Supplementary Figure 20.** Follow up analyses for the B cells. **(A)** Embedding of the B cells from single-cell data, colored by expression of the selected IFN-I genes identified by Hotspot (Ifit3, Ifit3b, Stat1, Ifit1, Usp18 and Isg15). **(B)** Joint embedding of the B cells from the scRNA-seq data (circles) and the spots with high abundance of B cells from the spatial transcriptomics data (crosses). Single-cell data is colored by normalized expression of the IFN-II marker genes. The arrow designates an interesting direction  $\gamma^*$ , drawn by eye-sight. **(C)** Spatial data colored by the projection of the embedding from DestVI for every spot along the direction  $\gamma^*$ . **(D-F)** Imputation of B cell-specific expression of the several marker genes on the spatial data.

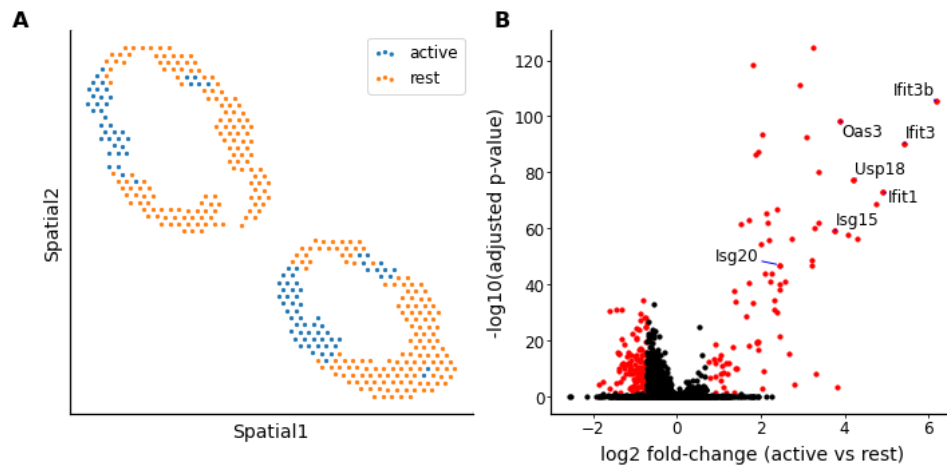

**Supplementary Figure 21. (A)** Definition of the active zone for differential expression analysis within MS samples. **(B)** B cell-specific differential expression analysis between MS and PBS lymph nodes (2,000 genes; 383 spots; total of 575 samples from the generative model). Significance is calculated with our differential expression procedure (**Online Methods**).

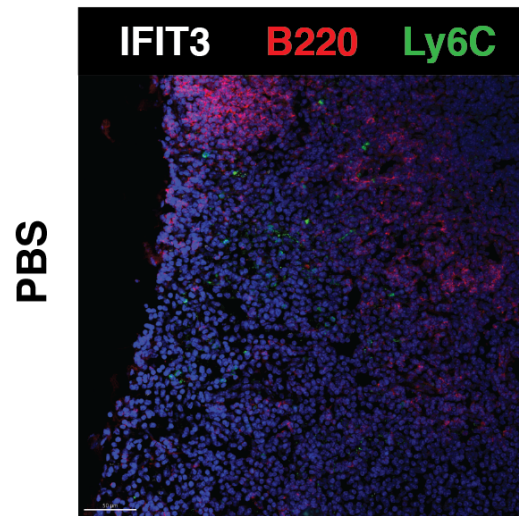

**Supplementary Figure 22.** Immunofluorescence imaging from a PBS lymph node. Scale bar, 50  $\mu$ m.

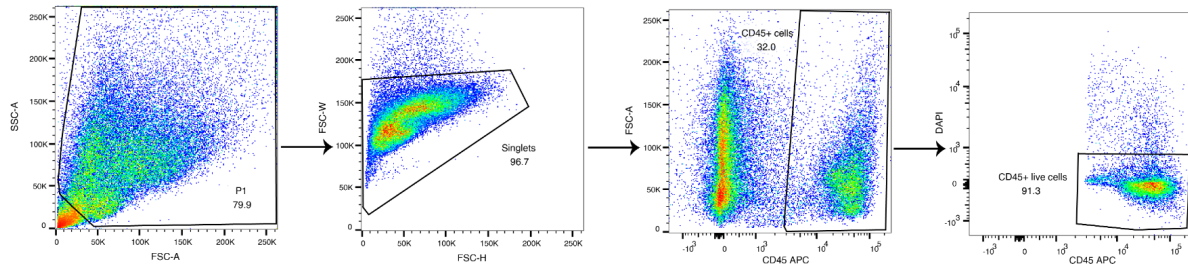

**Supplementary Figure 23.** FACS information for tumor single-cell data processing. Representative flow cytometry analysis of MCA205 tumor, showing CD45+ live cell fractions.

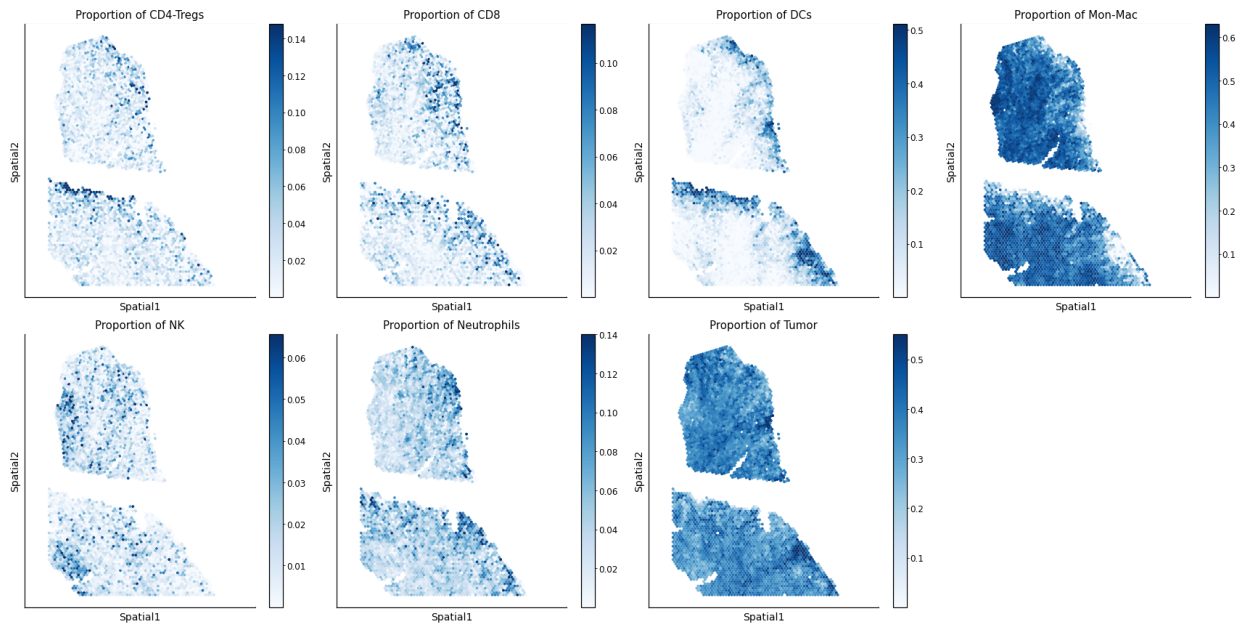

**Supplementary Figure 24.** Abundance of all cell types across all spots for the tumor spatial transcriptomics data.



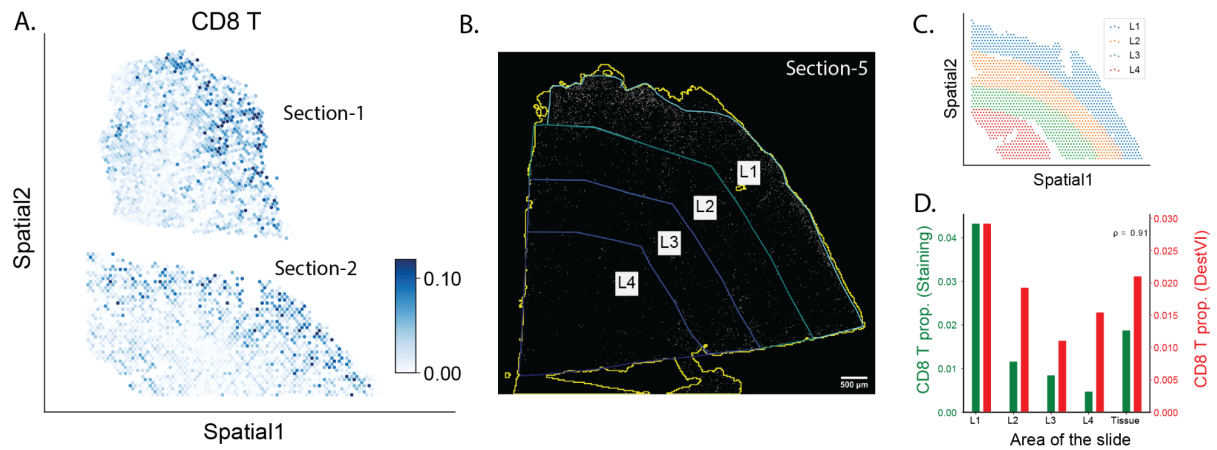

**Supplementary Figure 25.** Experimental validation of location of T cells with immunofluorescence staining. **(A)** Proportion of CD8 T cells, as inferred by the DestVI method. **(B)** Immunofluorescence staining of TCRb on a neighboring section of the same tumor (Section-5), located 60 microns away from Section-2. The image has been segmented into four layers (L1 through L4), from the periphery to the center of the tumor. Scale bar, 500  $\mu$ m. **(C)** Approximate matching of the layers onto the Visium Section-2. **(D)** Quantification of the staining proportions of CD8 T cells and the inferred proportions from the bulk profile. Refer to **Online Methods** for details about image processing.

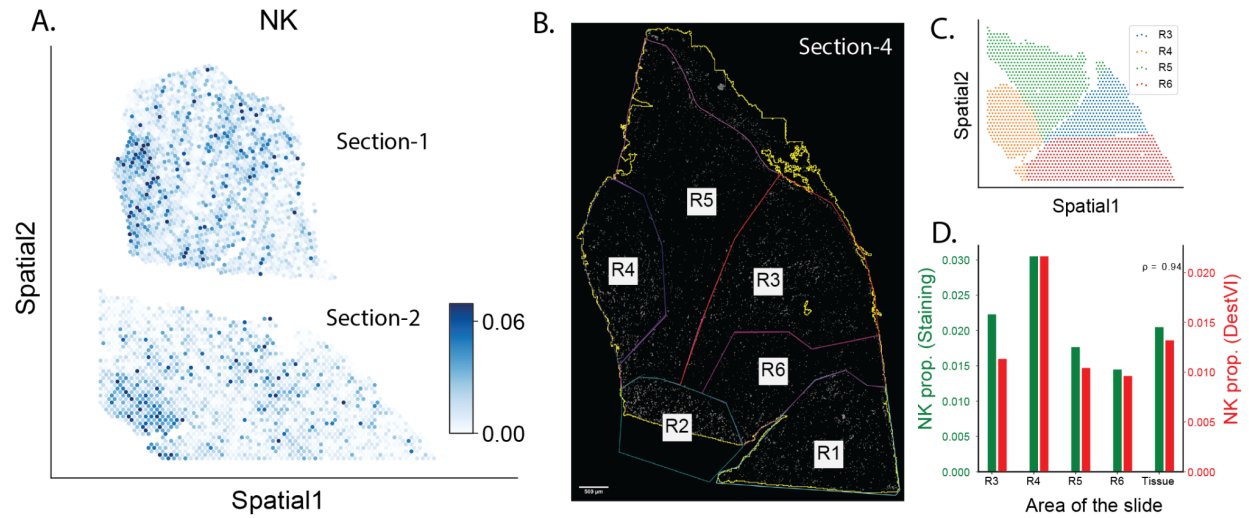

**Supplementary Figure 26.** Experimental validation of location of NK cells with immunofluorescence staining. **(A)** Proportion of NK cells, as inferred by the DestVI method. **(B)** Immunofluorescence staining of NK1.1 on a neighboring section of the same tumor (Section-4), located 30 microns away from Section-2. The image has been manually segmented into six regions (R1 through R6), which reflect niches with distinct densities in the imaging. Scale bar, 500 µm. Region of the tissue that is not in any of the segmented areas had low UMI content in Visium. **(C)** Approximate matching of the layers onto the Visium Section-2. R1 and R2 are outside the Visium spot grid. **(D)** Quantification of the staining proportions of NK cells and the inferred proportions from the bulk profile. Refer to **Online Methods** for details about image processing.

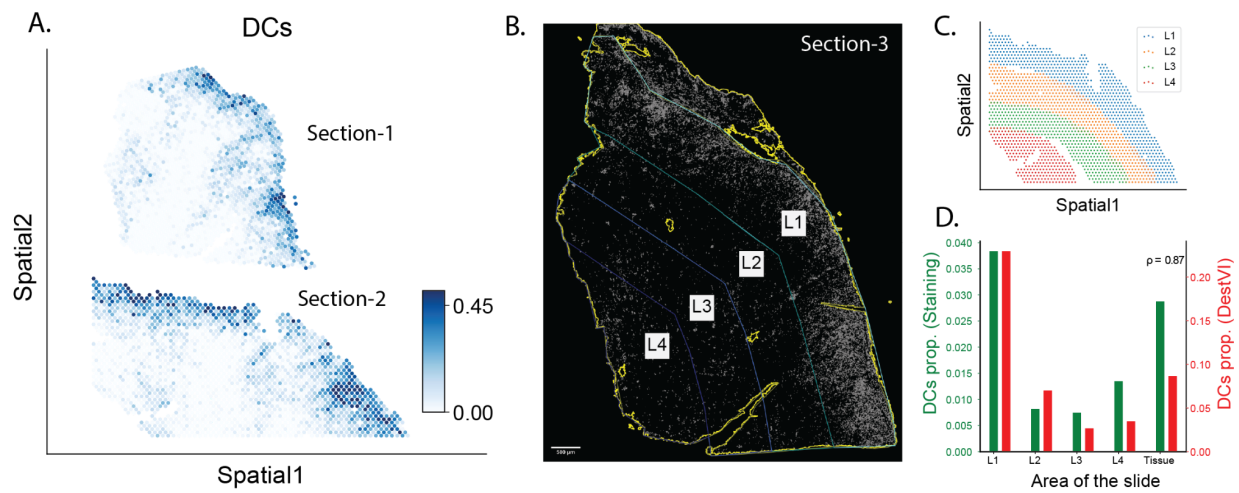

**Supplementary Figure 27.** Experimental validation of location of DCs with immunofluorescence staining. **(A)** Proportion of DCs, as inferred by the DestVI method. **(B)** Immunofluorescence staining of MHCII on a neighboring section of the same tumor (Section-3), located 20 microns away from Section-2. The image has been segmented into four layers (L1 through L4), from the periphery to the center of the tumor. Scale bar, 500  $\mu\text{m}$ . Region of the tissue that is not in any of the segmented areas had low UMI content in Visium. **(C)** Approximate matching of the layers onto the Visium Section-2. **(D)** Quantification of the staining proportions of DCs and the inferred proportions from the bulk profile. Refer to **Online Methods** for details about image processing.

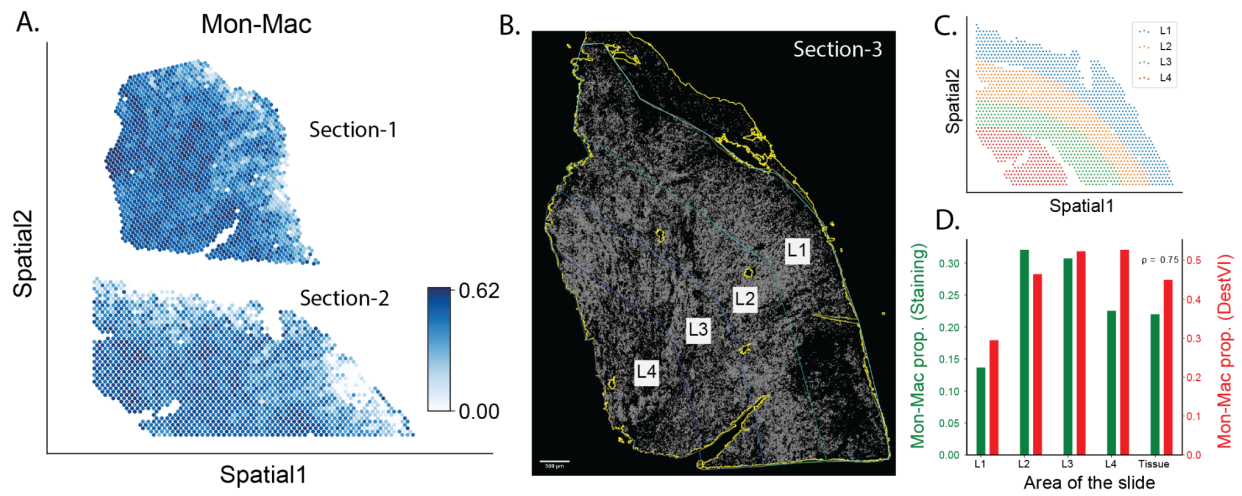

**Supplementary Figure 28.** Experimental validation of location of Mon-Mac with immunofluorescence staining. **(A)** Proportion of Mon-Mac, as inferred by the DestVI method. **(B)** Immunofluorescence staining of F4/80 on a neighboring section of the same tumor (Section-3), located 20 microns away from Section-2. The image has been segmented into four layers (L1 through L4), from the periphery to the center of the tumor. Scale bar, 500  $\mu$ m. Region of the tissue that is not in any of the segmented areas had low UMI content in Visium. **(C)** Approximate matching of the layers onto the Visium Section-2. **(D)** Quantification of the staining proportions of Mon-Mac and the inferred proportions from the bulk profile. Refer to **Online Methods** for details about image processing.

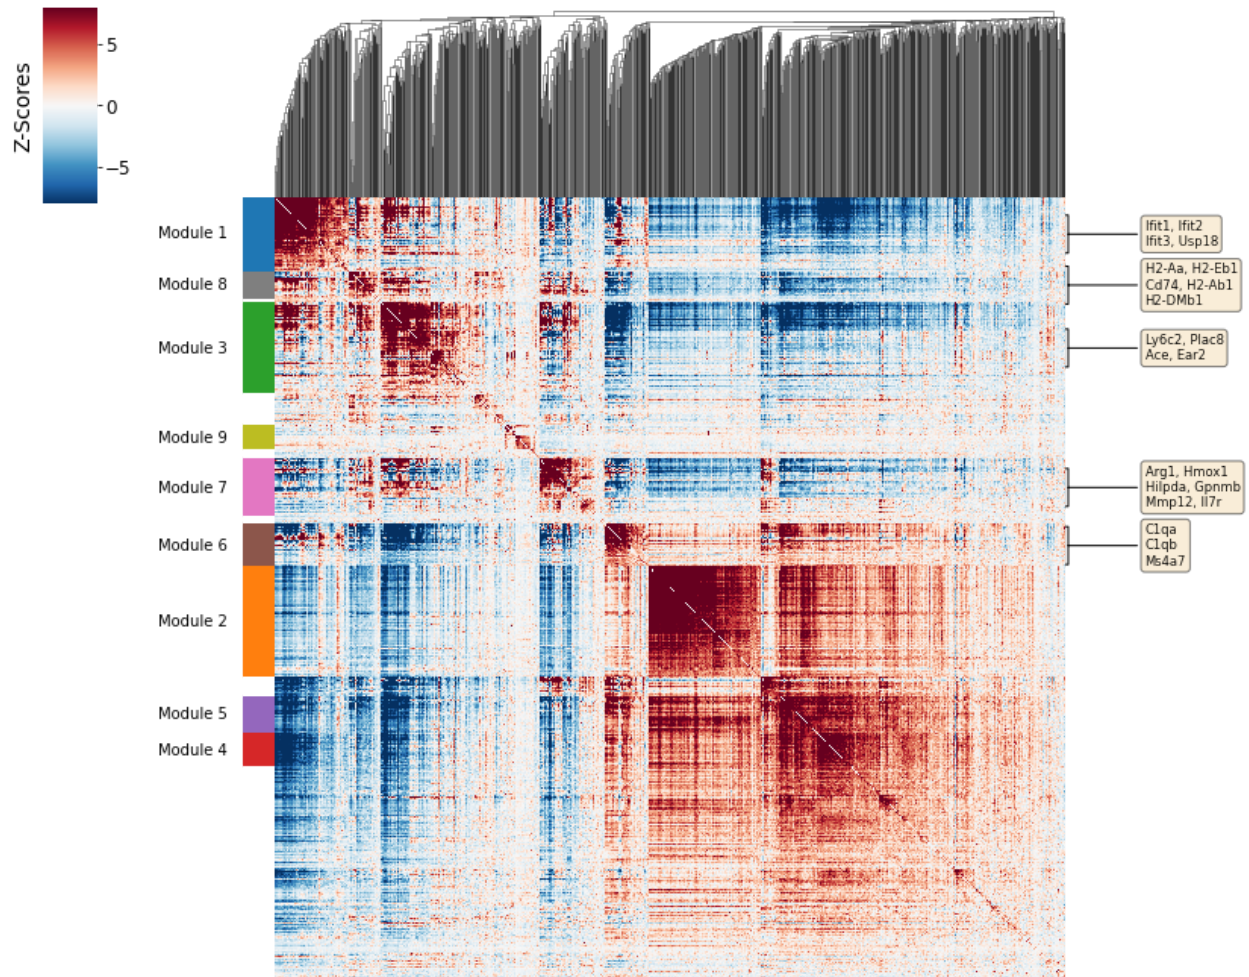

**Supplementary Figure 29.** Hotspot analysis for the Mon-Mac: gene-gene local autocorrelation matrix, and clustering into gene modules, based on the scRNA-seq data. We refer to the genes of module 1 as the Monocytes (IFN) module, to module 8 as Mon-DC, to module 3 as Monocytes (Ace), to module 7 as Mreg, and to module 6 as TAMs.

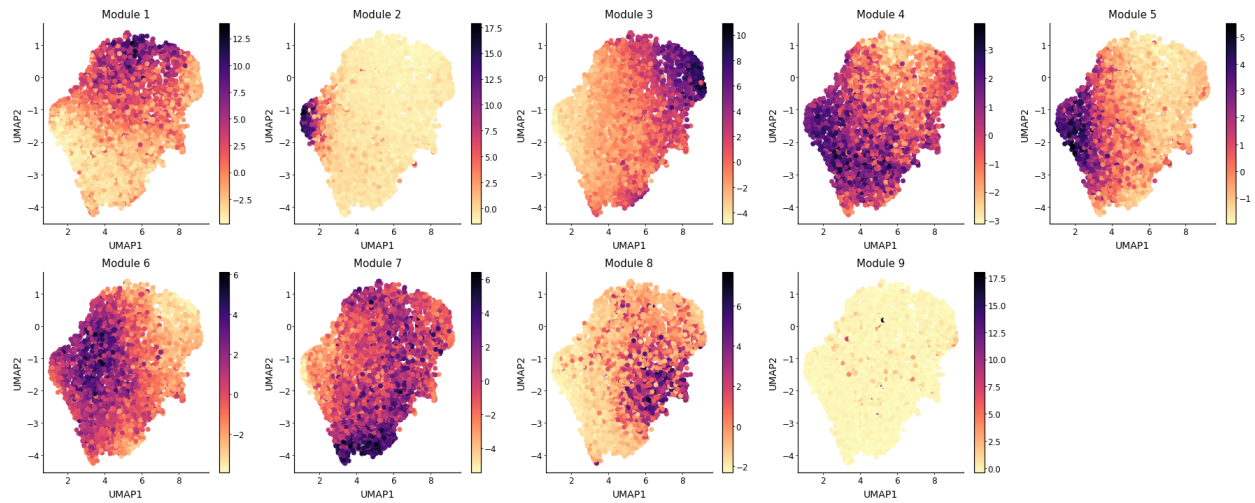

**Supplementary Figure 30.** Hotspot analysis for the Mon-Mac: projection of every gene module onto the embedding of the single-cell data (sCLVM). The names of those modules are included in the legend of **Supplementary Figure 29**.

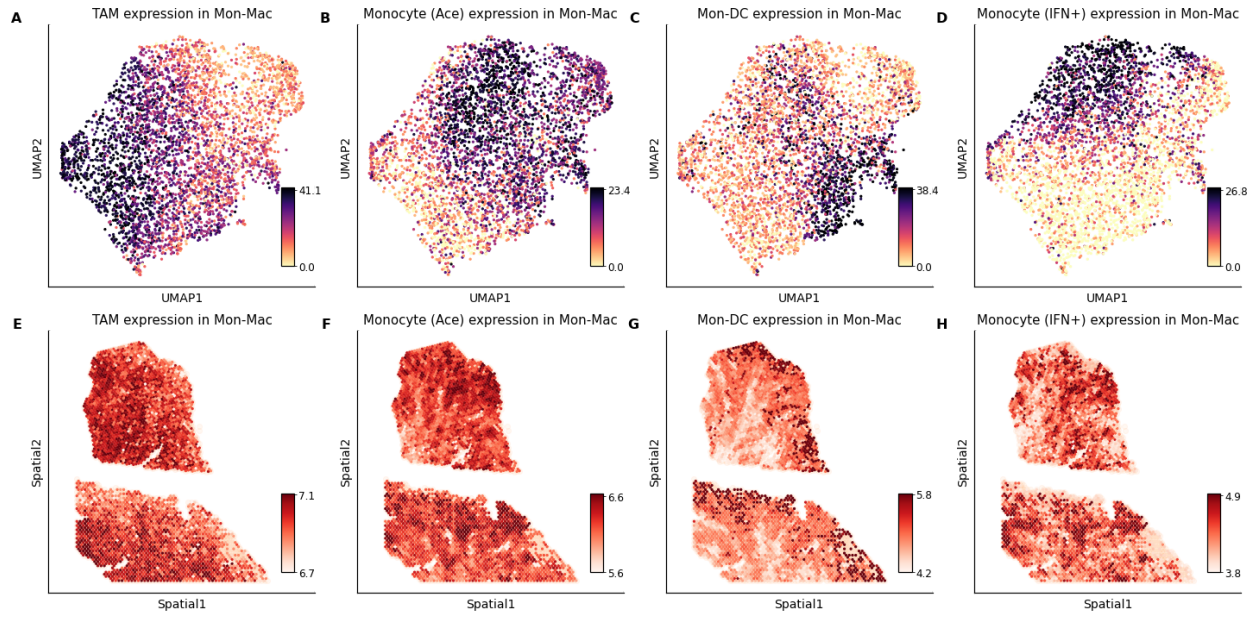

**Supplementary Figure 31. (A-D)** Visualization of selected gene expression modules inferred by Hotspot on the Mon-Mac cells from the scRNA-seq data. **(E-H)** Imputation of gene expression for those modules on the spatial dataset.

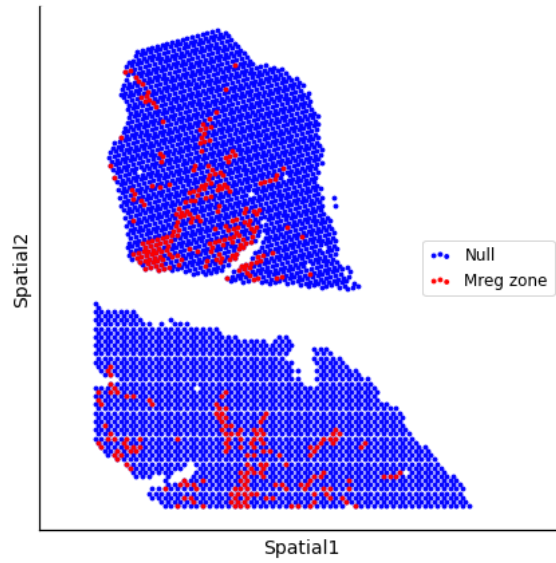

**Supplementary Figure 32.** Definition of the hypoxic zone (Mreg) for differential expression analysis.



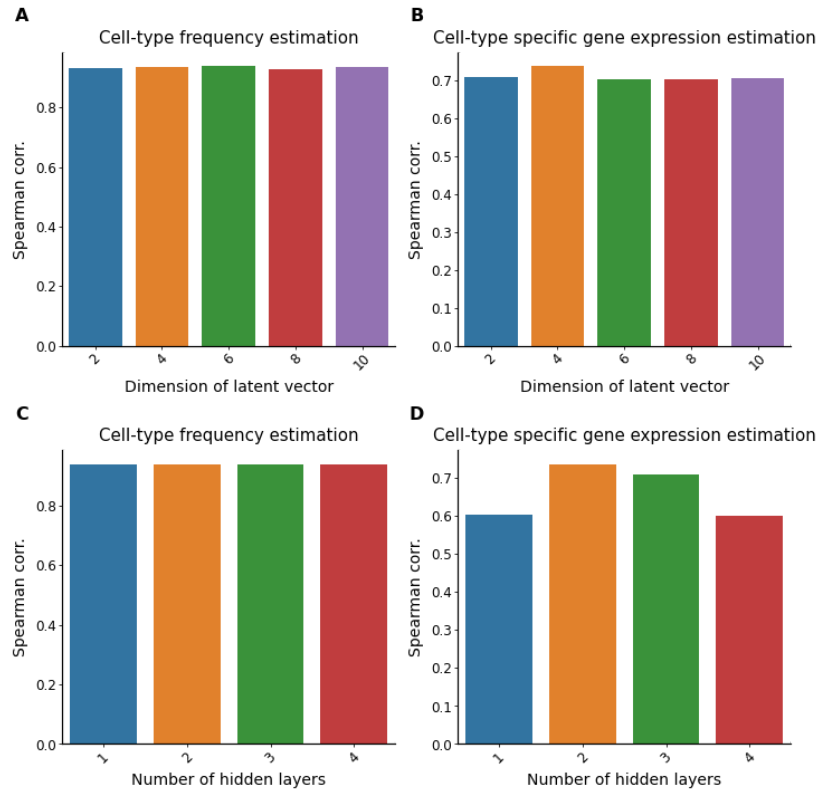

**Supplementary Figure 33.** Robustness of DestVI to different hyperparameters, on the simulation benchmark. **(AB)** Changing the number of latent dimensions for the cell type specific embedding. **(A)** Spearman correlation of estimated cell-type proportions compared to ground truth for several algorithms. **(B)** Spearman correlation of estimated cell-type-specific gene expression compared to ground truth for several algorithms. **(CD)** Changing the number of layers in the decoder neural network dimensions for the cell type specific embedding. **(C)** Spearman correlation of estimated cell-type proportions compared to ground truth for several algorithms **(D)** Spearman correlation of estimated cell-type-specific gene expression compared to ground truth for several algorithms.

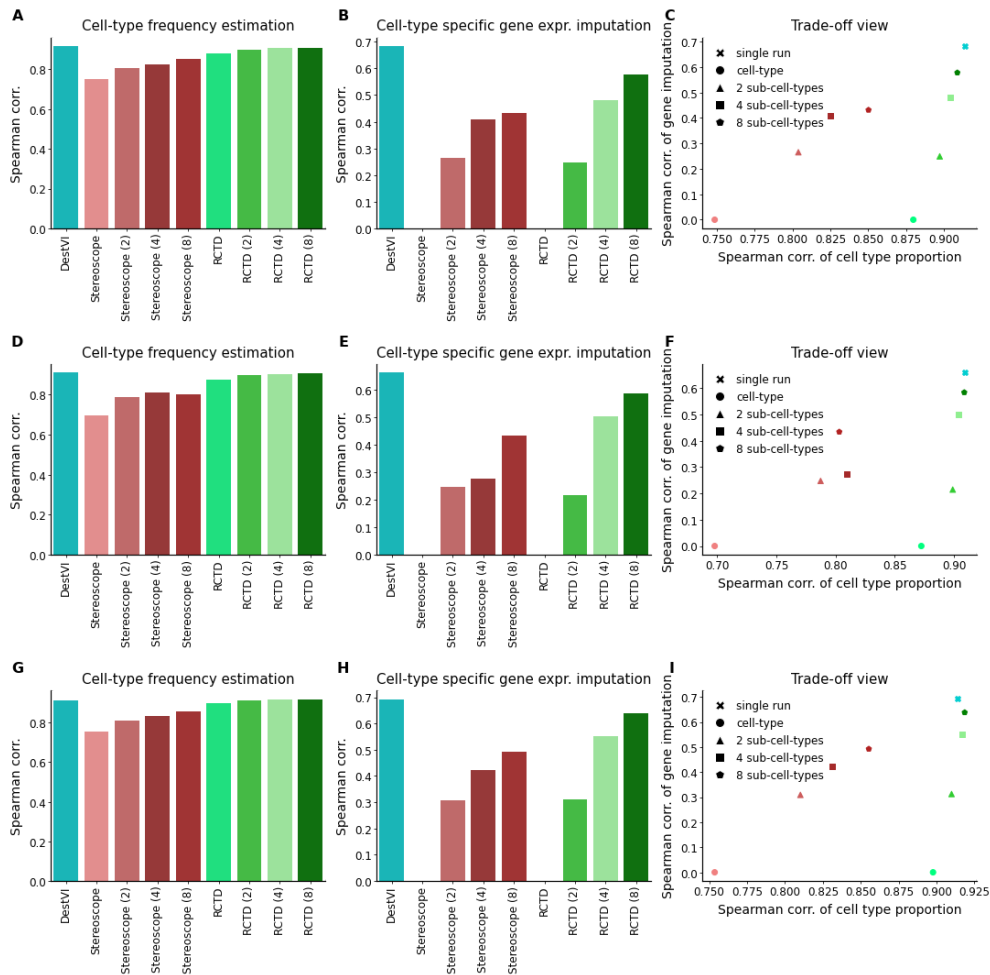

**Supplementary Figure 34.** Comparison of DestVI to competing algorithms on the extended set of simulation, possibly applied to different clustering resolutions. Every row is a different dataset: **(ABC)** base dataset, with seven cell types. **(DEF)** One cell type missing in the scRNA-seq data **(GHI)** One cell type missing in the spatial data. Inside every row, the legend is as follows (**left, e.g. A**) Spearman correlation of estimated cell-type proportions compared to ground truth for several algorithms. (**middle, e.g., B**) Spearman correlation of estimated cell-type-specific gene expression compared to ground truth for several algorithms (**right, e.g. C**) Scatter plot of both Spearman correlation metrics.

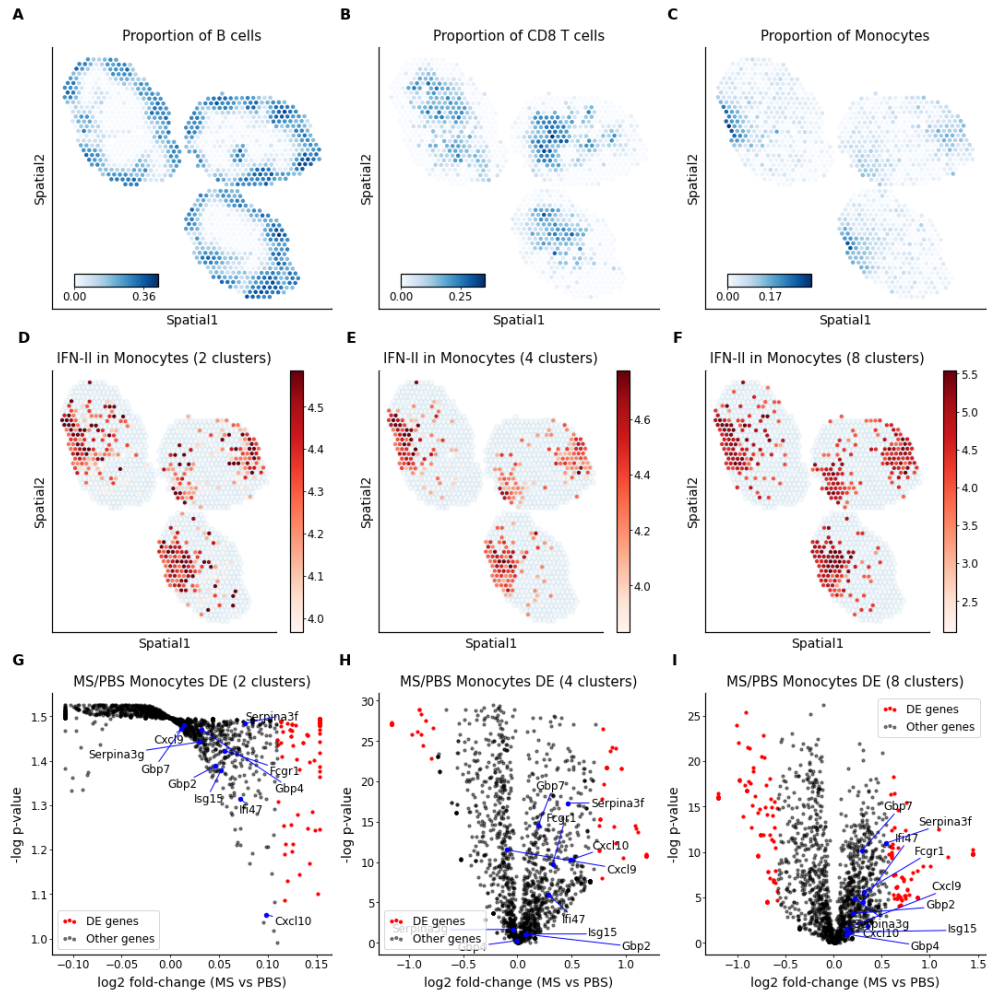

**Supplementary Figure 35:** Application of Stereoscope to the murine lymph nodes. **(ABC)** Spatial distribution of cell-type proportions for B cells **(A)**, CD8 T cells **(B)**, and Monocytes **(C)** and NK cells. **(DEF)** Imputation of monocyte-specific expression of the IFN-II marker genes for the spatial data (log-scale), reported only on spots with high abundance of monocytes based on two sub-clusters **(D)**, four sub-clusters **(E)** and eight subclusters **(F)**, respectively. **(GHI)** Monocyte-specific differential expression analysis between MS and PBS lymph nodes (2,000 genes). Significance is calculated with a t-test on log-normalized imputed data with FDR control (FDR < 0.05). Imputed gene expression is based on two sub-clusters **(G)**, four sub-clusters **(H)** and eight subclusters **(I)**, respectively.

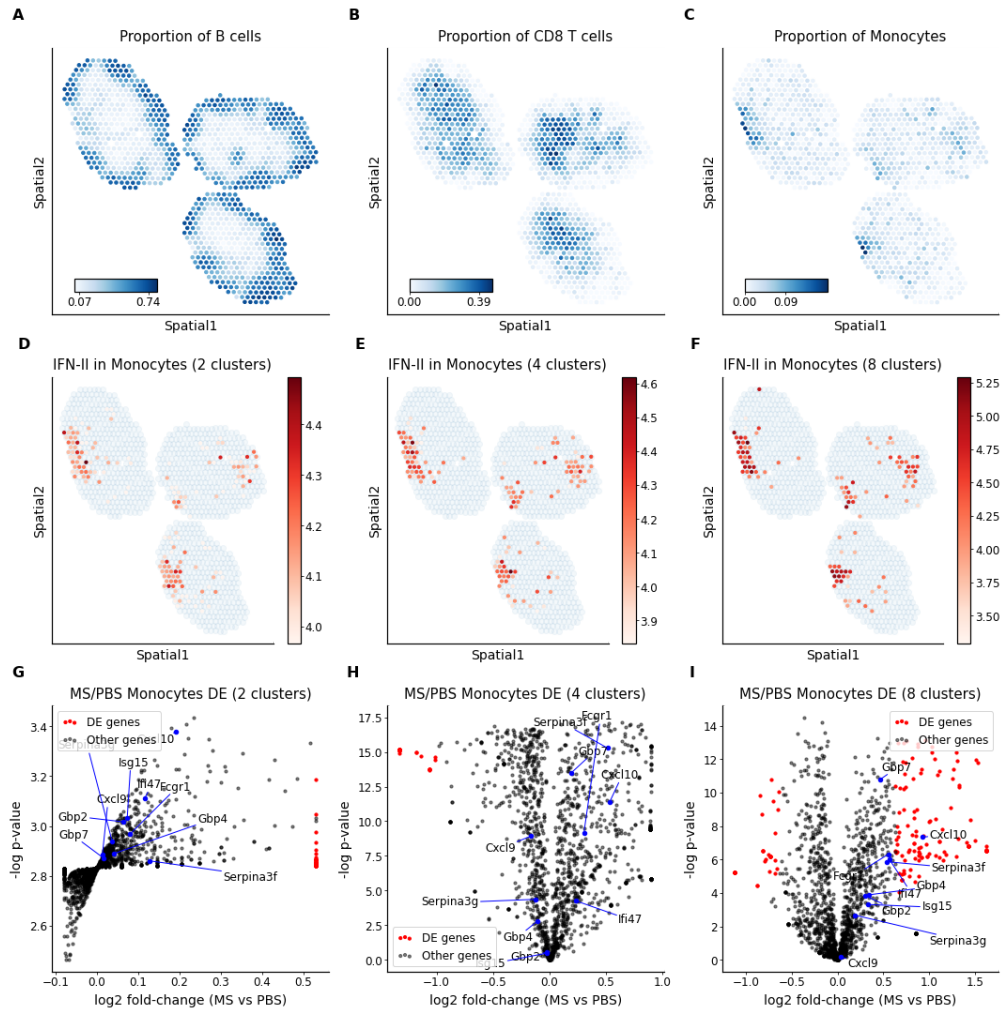

**Supplementary Figure 36:** Application of RCTD to the murine lymph nodes. **(ABC)** Spatial distribution of cell-type proportions for B cells **(A)**, CD8 T cells **(B)**, and Monocytes **(C)** and NK cells. **(DEF)** Imputation of monocyte-specific expression of the IFN-II marker genes for the spatial data (log-scale), reported only on spots with high abundance of monocytes based on two sub-clusters **(D)**, four sub-clusters **(E)** and eight subclusters **(F)**, respectively. **(GHI)** Monocyte-specific differential expression analysis between MS and PBS lymph nodes (2,000 genes). Significance is calculated with a t-test on log-normalized imputed data with FDR control (FDR < 0.05). Imputed gene expression is based on two sub-clusters **(G)**, four sub-clusters **(H)** and eight subclusters **(I)**, respectively.

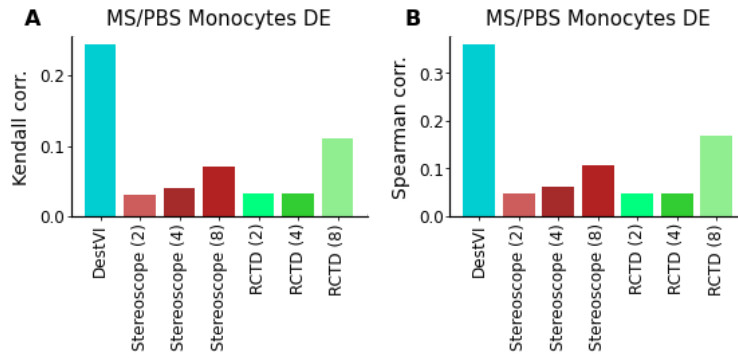

**Supplementary Figure 37:** Assessment of the differential expression procedure on the lymph node data with several deconvolution methods. **(AB)** Correlation metrics between estimated log-fold-change by the benchmark methods and the groundtruth from the publicly available scRNA-seq data **(A)** Kendall correlation **(B)** Spearman correlation.

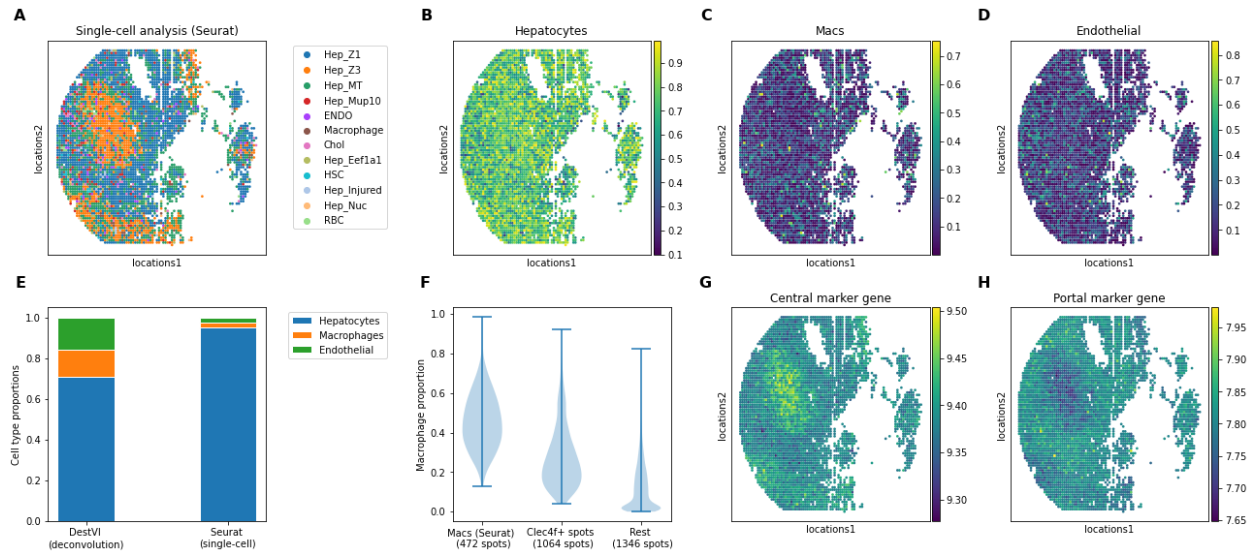

**Supplementary Figure 38:** Analysis of the Seq-Space liver data using DestVI. All the spatial plots are for section 2104 only, statistics are reported across the whole set of sections. **(A)** Result from the annotation pipeline of the original manuscript, treating each spot of size 10 microns by 10 microns as a single-cell, and running the Seurat pipeline. **(BCD)** Cell type estimated with DestVI, by fitting the scLVM on the tabula muris senis data. The original datasets contained three cell types **(B)** hepatocytes, **(C)** Kupffer cells or macrophages and **(D)** endothelial cells. **(E)** Average cell type composition in the whole tissue estimated by DestVI and Seurat. **(F)** Violin plots for the proportion of macrophages in different subset of spots. First, the set of spots annotated as macrophages by Seurat (472 spots). Second, the set of spots with non-zero count for the expression of Clec4f (1064 spots, only 190 of them overlap with the previous set). Third, the spots in neither of the previous sets (1346 spots). **(G)** Hepatocyte-specific imputation of marker genes for the central region according to DestVI (Akr1c6, Car3, Cyp2d9, Cyp2e1, Cyp3a11, Gsta3, Gstm1, Inmt, Mgst1, Nrn1, Pex11a, Pon1, Slc22a1). **(H)** Hepatocyte-specific imputation of marker genes for the portal region according to DestVI (Cyp2f2, Hpx, Hsd17b13, Mug2, Serpina1e).

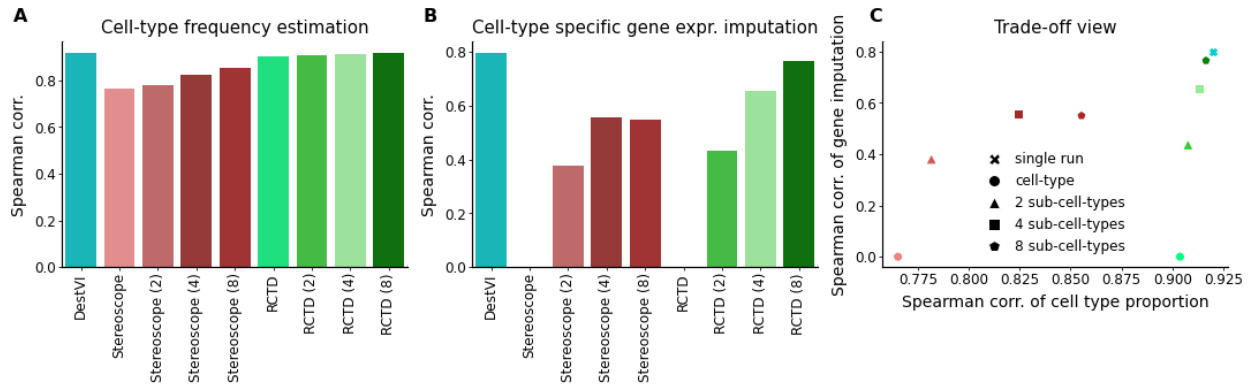

**Supplementary Figure 39.** Comparison of DestVI to competing algorithms on the sparse simulation, possibly applied to different clustering resolutions. **(A)** Spearman correlation of estimated cell-type proportions compared to ground truth for several algorithms. **(B)** Spearman correlation of estimated cell-type-specific gene expression compared to ground truth for several algorithms **(C)** Scatter plot of both Spearman correlation metrics.

# Supplementary Tables Legend

**Supplementary Table 1 - Abundance of cell types in the lymph node scRNA-seq data**

**Supplementary Table 2 - Differential expression of Monocytes expression only, in spatial transcriptomics across conditions**

**Supplementary Table 3 - Differential expression of B cells expression only, in spatial transcriptomics across conditions**

**Supplementary Table 4 - Differential expression of B cells expression only, in MS lymph nodes (active area versus rest)**

**Supplementary Table 5 - Abundance of cell types in the scRNA-seq tumor data**

**Supplementary Table 6 - Descriptive of all the MCA205 tumor sections used in the manuscript**

**Supplementary Table 7 - Differential expression of Mon-Mac expression only in spatial transcriptomics across Mreg abundant area against the rest of the tissue**



# Supplementary Note 1: DestVI report for the lymph node data

## Step A: Automatic thresholding

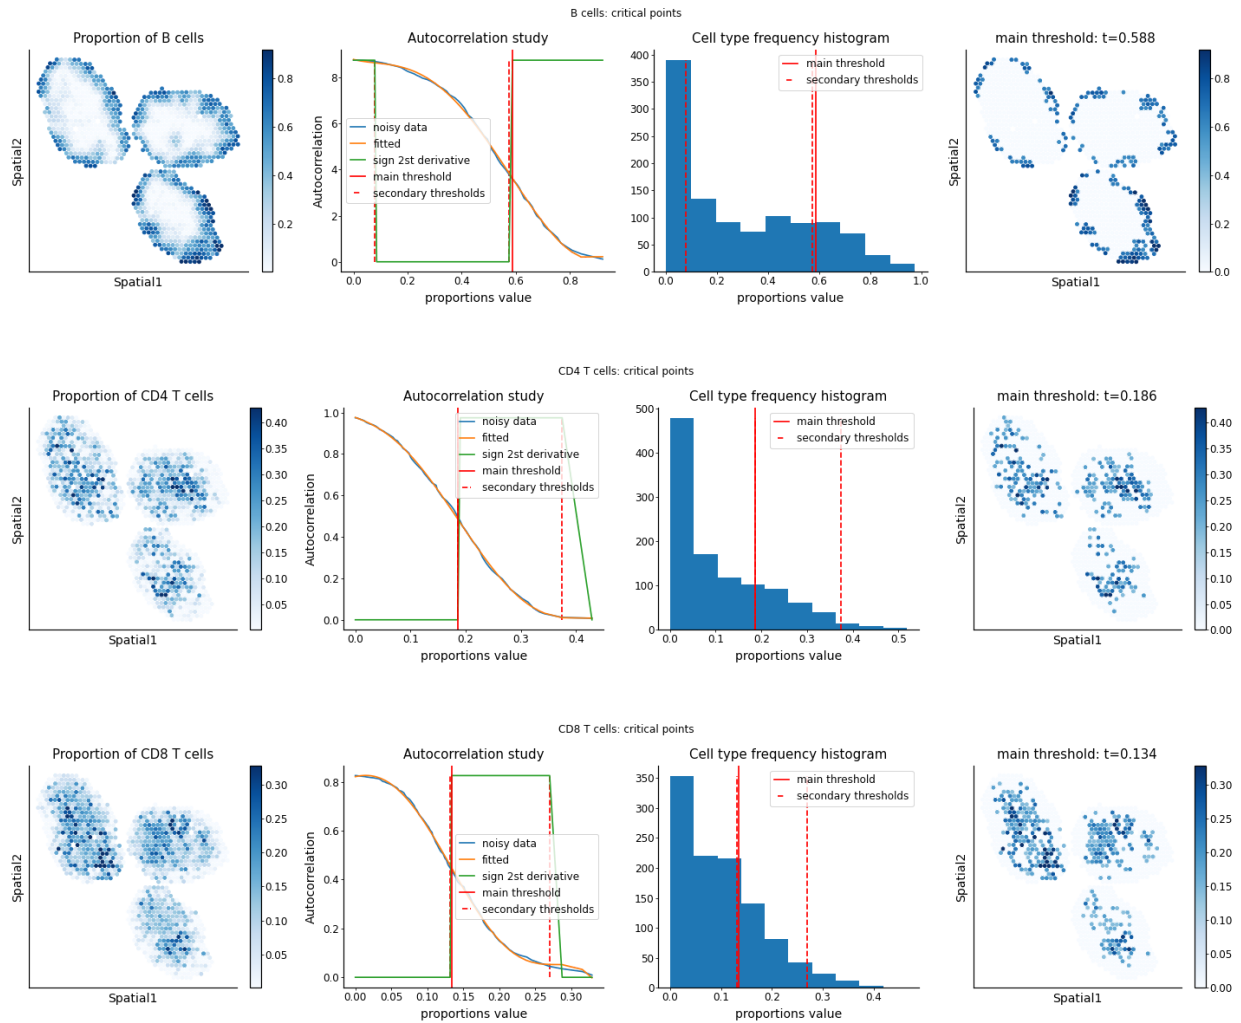

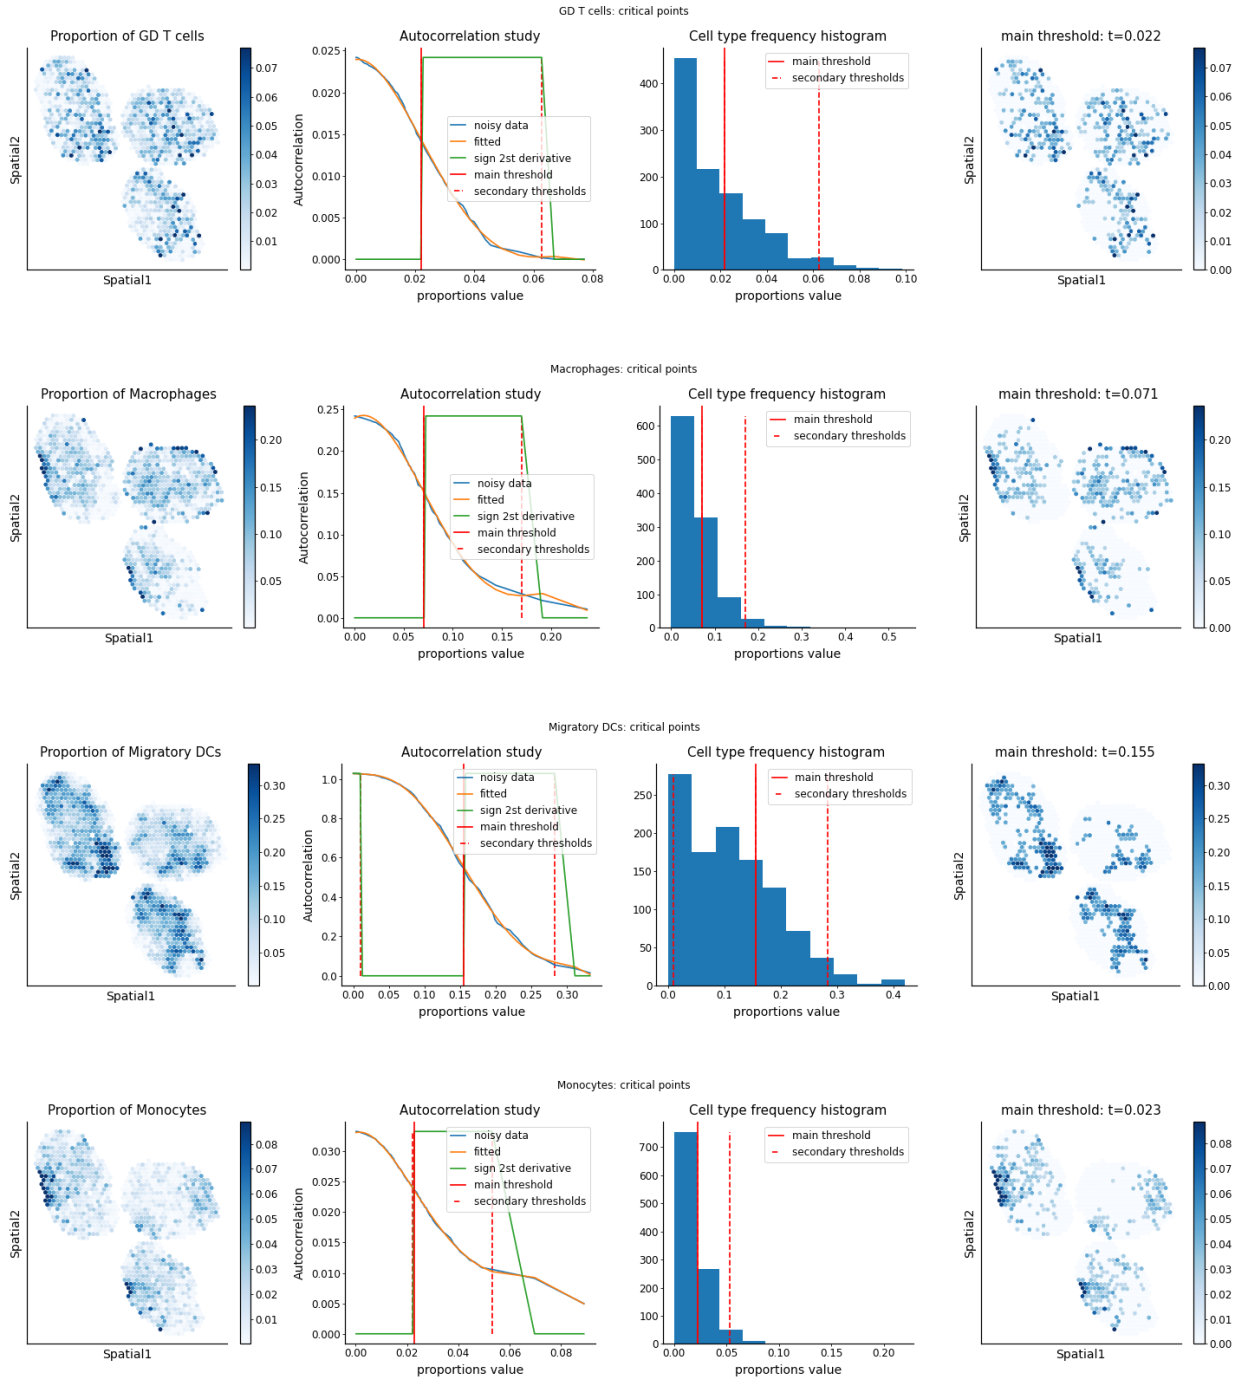

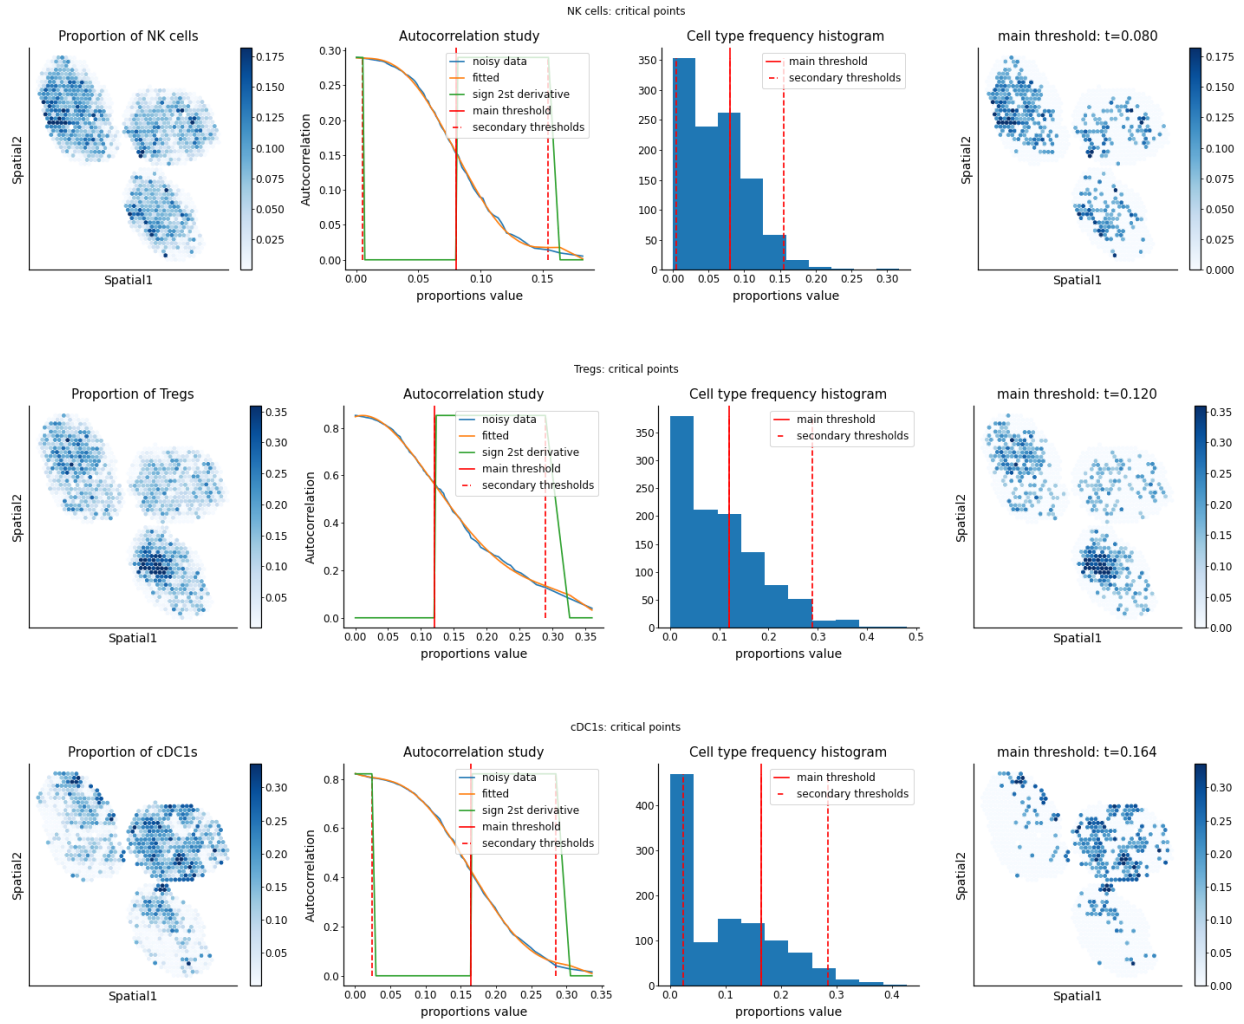

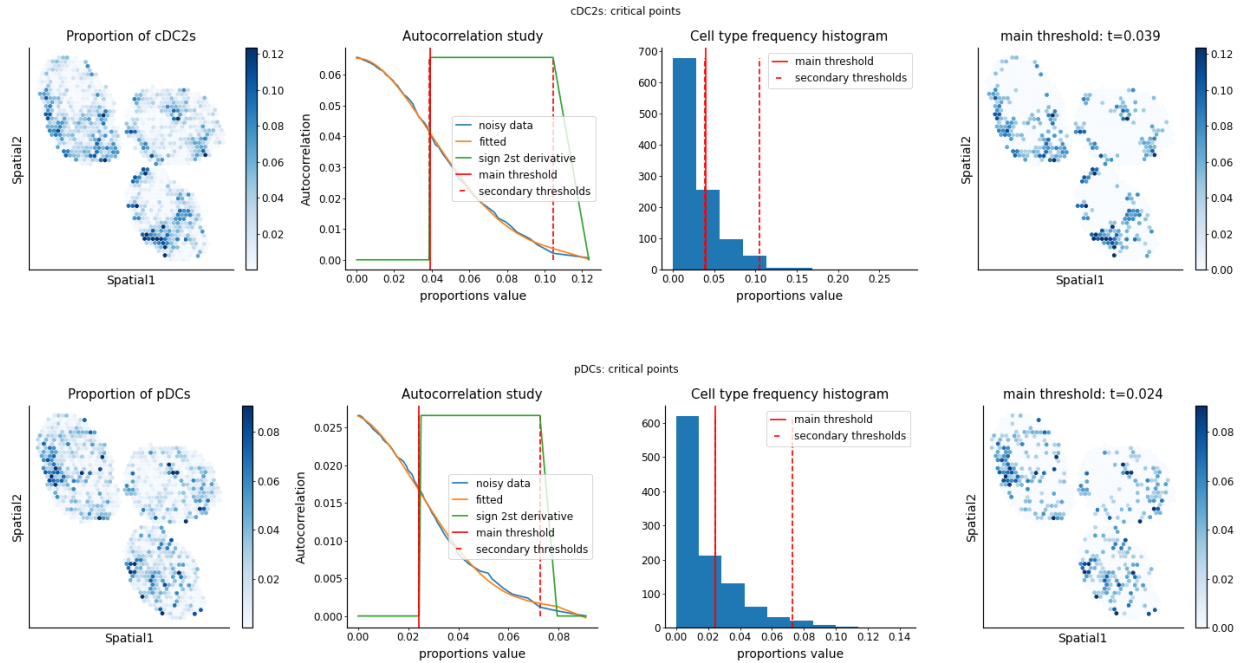

## Step B: weighted PCA and GSEA

### B cells

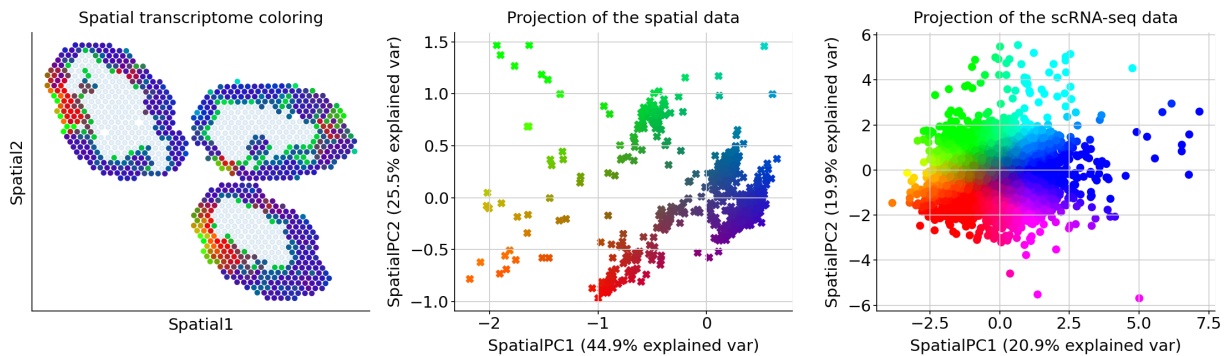

### Genes associated with SpatialPC1

#### Positively correlated

Cldn1, Trem2, Mertk, Met, Tnnt2, Mfsd7a, Mab21l3, Ptprm, Mmp12, Syndig1l, Tarm1, Clec1b, Spint1, Cd300lb, Ear2, Pilrb1, Ppp1r3d, Itga8, Hpn, Hcar2, Ace, Ankrd35, Scn3a, Sirpb1c, Cd83, Nr4a1, Gm26532, Birc5, Bcl2a1b, Ncl, Ccna2, Npm1, Rplp0, Cks1b, Nme1, Impdh2, Mki67, Ccnb2, Ppp1r14b, Rps27l, Ube2c, Rel, Dennd4a, Tpx2, Cdca3, Dctpp1, Rps2, Ran, Hmnr, Atp5g1

FOXM1 transcription factor network\*, Myc active pathway\*, T cell receptor regulation of apoptosis\*, Aurora B signaling\*, Ran role in mitotic spindle regulation, Cyclin A/B1-associated events during G2/M

transition, Cell cycle, Thymic stromal lymphopoietin (TSLP) pathway, Interleukin-11 pathway, Dilated cardiomyopathy

#### **Negatively correlated**

Ifit3, Slfn5, Irf7, Ifit3b, Rtp4, Stat1, Ighm, Usp18, Oasl2, Ifit1, Malat1, Cd79a, H2-Eb1, Ifit2, Zbp1, Serpina3g, Rsad2, Cd74, Hspa1b, Ifi47, Jun, H2-Aa, Igtp, H2-Ab1, Ifi2712a, Oas3, Gbp4, Parp14, Trim30a, Isg15, Gbp7, Serpina3f, Pkib, Cmpk2, Irf1, Ly6d, Ifitm3, Rnf213, Isg20, Sdc3, Bst2, Fth1, Hist1h1c, Socs1, Ms4a4c, Igkc, Phf11b, Wfdc17, Csf1, Lgals3bp

Interferon alpha/beta signaling\*, Interferon signaling\*, Immune system signaling by interferons, interleukins, prolactin, and growth hormones\*, Immune system\*, Interferon-gamma signaling pathway\*, Type II interferon signaling (interferon-gamma)\*, Antiviral mechanism by interferon-stimulated genes\*, Interferon alpha signaling regulation\*, Prolactin activation of MAPK signaling\*, Interferon-beta enhancer pathway\*

#### **Genes associated with SpatialPC2**

##### **Positively correlated**

Mertk, Tnnt2, Mab2113, Sirpb1c, Pilrb1, Ear2, Cldn1, Ptprm, Ppp1r3d, Clec1b, Cd300lb, Ankrd35, Spint1, Itga8, Scn3a, Mmp12, Hcar2, Hpn, Met, Tarm1, Ace, Syndig1l, Mfsd7a, Trem2, Rpsa, Rps2, Rplp0, Ppia, Ptma, Rpl41, Rplp1, Nme2, Rps12, Hsp90ab1, C1qbp, Rrm2, Mettl1, Npm1, Birc5, Timm8a1, Asf1b, Syce2, Ccna2, Dnph1, Cdk1, Stmn1, Ube2c, Mif, Impdh2, Cdc45

Cytoplasmic ribosomal proteins\*, Influenza viral RNA transcription and replication\*, Influenza infection\*, Translation\*, G1/S-specific transcription\*, Cell cycle\*, Disease\*, E2F-mediated regulation of DNA replication\*, Aurora B signaling\*, FOXM1 transcription factor network\*

##### **Negatively correlated**

Ifit3, Trim30a, Slfn5, Malat1, Irf7, Parp14, Stat1, Usp18, Rtp4, Fosb, Ly6a, Ifit1, Tcf4, Ifit3b, Rnf213, Rsad2, Ms4a1, Eif2ak2, Gbp7, Ifi2712a, Pkib, Dennd4a, Zbp1, Plac8, Ifit2, Herc6, B2m, Cybb, Bcl11a, Isg15, Fos, Oasl2, Pim1, Klf4, Mpeg1, Cd86, Oas3, Junb, Ifi30, Bst2, Phf11b, Cd69, Ccnd2, Ly6d, Ly86, Vps37b, Zbtb20, Traf1, Gm26532, Dusp1

Interferon signaling\*, Interferon alpha/beta signaling\*, Immune system signaling by interferons, interleukins, prolactin, and growth hormones\*, Immune system\*, Wnt interactions in lipid metabolism and immune response\*, Interferon-gamma signaling pathway\*, Type II interferon signaling (interferon-gamma)\*, Antiviral mechanism by interferon-stimulated genes\*, T cell receptor regulation of apoptosis\*, Interleukin-3 regulation of hematopoietic cells\*

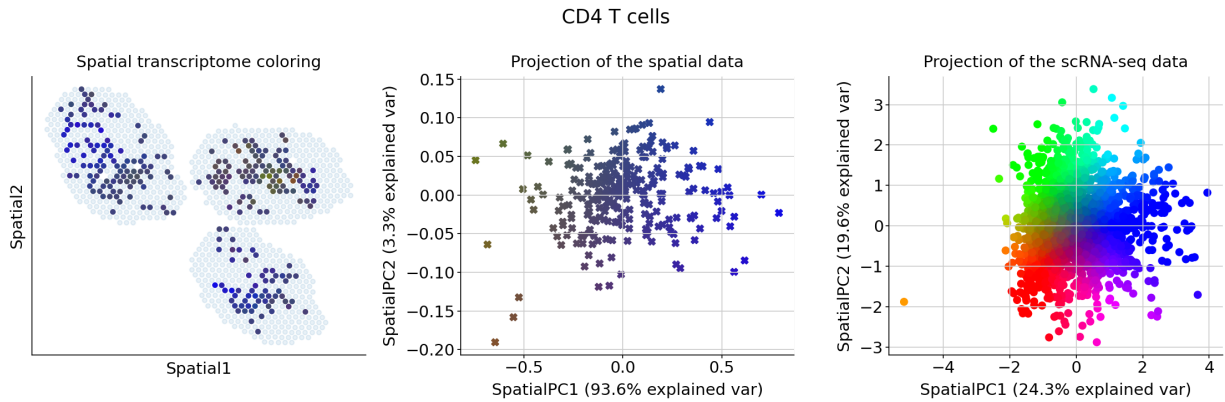

## Genes associated with SpatialPC1

### Positively correlated

Gpx3, Ncam1, Cblc, Tgm1, Il15, Cbr2, Cbr3, Tfec, Ccdc80, Mt2, Ccl17, Rasal2, Depdc1a, Mxd3, Ccl8, Ccl9, Gprc5c, Gpr141, Ccr1, Ccr10, Mycl, Tarm1, Mylk, Myof, Sirpb1b, Sirpb1c, Pilrb1, Rassf6, Cd14, Cd163l1, Igha, Thbd, P2ry6, Card10, Emilin2, Iqgap3, Cpne8, Erbb2, Gas7, Epha2, Tmod2, Ip6k3, Havcr1, Tmem51, Mmp12, Cox6a2, Il4, Slc7a11, Sh2d1b1, Cma1

Cytokine-cytokine receptor interaction\*, Thymic stromal lymphopoietin (TSLP) pathway\*, Intestinal immune network for IgA production, Binding of chemokines to chemokine receptors, Chemokine signaling pathway, Selective expression of chemokine receptors during T-cell polarization, Interleukin-7 interactions in immune response, Cytokines and inflammatory response, Arachidonic acid metabolism, Peptide G-protein coupled receptors

### Negatively correlated

Rpsa, Rps2, Tmsb4x, Rplp0, Rplp1, Npm1, Rps12, Rpl41, Actg1, Ppia, Tagln2, Thy1, Vim, Actb, Cep55, Set, Crip1, Mif, Gm42418, S100a10, Eif4a1, Zyx, Ptma, Nme1, Gapdh, Chchd10, Cd3g, Lgals1, Dut, Spint2, Ckb, Slc25a4, Ptpn7, Adap1, Cd5, Atp1b1, Tubb5, Impdh2, Ybx1, Ddit4, Igfbp4, Tnfrsf9, Rbbp7, Ppp1r14b, Hist1h3c, Ube2c, Nme2, Mcm7, Ran, Hspe1

T cell receptor regulation of apoptosis\*, Influenza infection\*, Disease\*, Translation\*, Cytoplasmic ribosomal proteins\*, Influenza viral RNA transcription and replication\*, Protein metabolism\*, Myc active pathway\*, Activation of mRNA upon binding of the cap-binding complex and eIFs, and subsequent binding to 43S\*, Nucleotide metabolism\*

## Genes associated with SpatialPC2

### Positively correlated

Mt2, Klra6, Gpr35, Klra2, Plekhg1, Arhgap22, Gpr141, Stab2, Klra3, Klra7, Cd300c, Klra8, Styk1, Cysltr1, Sucnr1, Plcb1, Klra9, Ccr1, Klra17, Gpr4, Spry2, Gprc5c, Arpin, Guca1a, Ccl8, Gstm5, Sox13, Ccl9, Kif2c, Gramd2, Kif5a, Spint1, Gpx3, Plscr4, Klk1b27, Klra1, Spp1, Klrb1a, Klrb1b, Ccr10, Tfec, Ckap2l, Pf4, Tgm1, Thbd, Pde8b, Pde1c, Gcsam, Pcp4, Cd300a

Class A GPCRs (rhodopsin-like)\*, Chemokine signaling pathway\*, Binding of chemokines to chemokine receptors, Coagulation common pathway, cAMP cell motility pathway inferred from amoeba model, Eicosanoid metabolism, Kinesins, Signaling by GPCR, Fibrin clot formation (clotting cascade), GPCR ligand binding

### Negatively correlated

Rps2, Rpsa, Nme2, Rplp0, Rplp1, Ppp1r14b, Ppia, Mettl1, C1qbp, Nme1, Ptma, Fbl, Srm, Ranbp1, Actb, Eif5a, Igfbp4, Npm1, Ppa1, Atp5g1, Gar1, Eif4a1, Prmt1, Hspa9, Mif, Nolc1, Tuba1b, Ran, Mrto4, Cct3, Shmt2, Phgdh, Uqcc2, Shmt1, Ssrp1, Prdx1, Rpl41, Nop58, Timm8a1, Psm7, Ccnd2, Actg1, Impdh2, Gnl3, Mthfd2, Pa2g4, Hspe1, Rexo2, Ly6a, Nhp2

Protein metabolism\*, Disease\*, T cell receptor regulation of apoptosis\*, Myc active pathway\*, Influenza infection\*, Translation\*, Cytoplasmic ribosomal proteins\*, HIV infection\*, Influenza viral RNA transcription and replication\*, HIV factor interactions with host\*

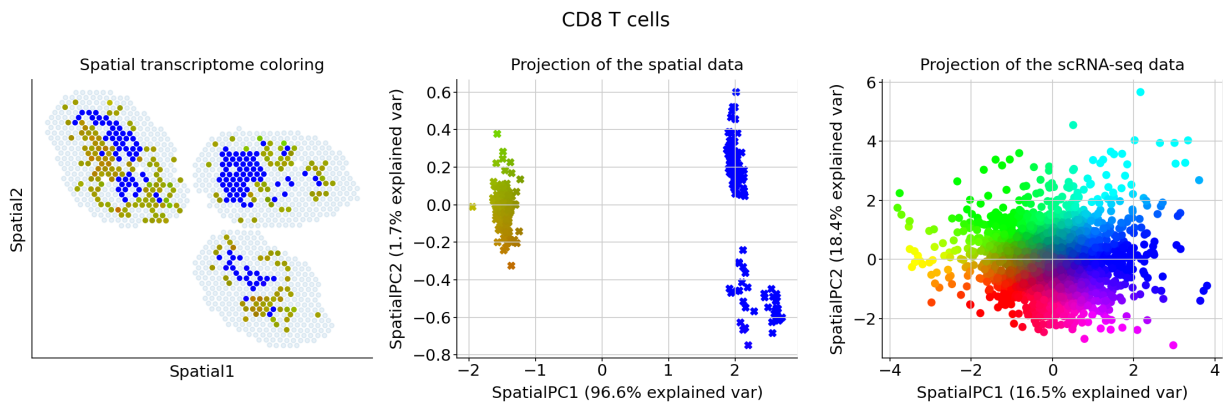

### Genes associated with SpatialPC1

#### Positively correlated

Ccdc80, Gpr162, Cacna1b, Cd59a, Lipc, Ncam1, Fcgr4, Sirpb1b, Lmo7, Sirpb1c, Ffar2, Lrp1, Clec9a, Lrrc25, Htr7, Clec4g, Tmod2, Slc16a9, Clec4e, Fcgr1, Adam11, Il4, Adgrg6, Nuggc, Fads3, Nrnx1, Fam149a, Itga9, Gpr141, Cd300lb, Trem14, Crispld2, Itga8, Nlrp3, Cebpa, Scn3a, Sct, Gcsam, Sept3, Clec4d, Clec4a2, Tmem26, Cadm1, Ace, Tfec, Ip6k3, Mab21l3, Mmp12, Cadm3, Mfsd7a

Cell adhesion molecules (CAMs)\*, Nectin/Necl trans heterodimerization\*, Plexin D1 signaling, L1CAM interactions, Integrin family cell surface interactions, Dilated cardiomyopathy, Statin pathway, Adherens junction actin cytoskeletal organization, Signal transduction by L1, Urokinase-type plasminogen activator (uPA) and uPAR-mediated signaling

#### Negatively correlated

Tmsb4x, Gm42418, Ccl5, Fcer1g, Klrc2, Rplp1, Klra1, Rbpms, Klrk1, Klra7, Klre1, Klrc1, Crip1, Itga1, Ly6c2, Tcrg-C2, Tcrg-C1, Trdc, Selplg, Ncr1, Klra9, Tcrg-C4, Klra6, Anxa2, Klrb1c, Arl4d, Samd3, Pla2g7, Klrg1,

Rab7b, Lrrk1, Rpsa, Klrd1, Spry2, Ifitm10, Il1rn, Sirpa, Ifng, Fasl, Tyrobp, S100a6, Rab44, Klri2, Serpina3g, Cxcr3, Tnfaip2, Il7r, Gfra2, Cd5l, Havcr2

Natural killer cell-mediated cytotoxicity\*, Leptin influence on immune response\*, Immunoregulatory interactions between a lymphoid and a non-lymphoid cell\*, T cell receptor regulation of apoptosis\*, Ras-independent pathway in NK cell-mediated cytotoxicity\*, Antigen processing and presentation\*, Graft-versus-host disease\*, Interleukin-2 signaling pathway\*, Interleukin-1 regulation of extracellular matrix\*, TNF-alpha effects on cytokine activity, cell motility, and apoptosis\*

## Genes associated with SpatialPC2

### Positively correlated

Rab38, Tmem26, Fads3, Fam149a, Sirpb1c, Fcgr1, Fcgr4, Ffar2, Ffar4, Tlr13, Tlr11, Fndc7, Folr2, Fzd1, Ncam1, Thbs1, Gcsam, Gm12972, Gm13710, Etl4, Epha2, Nuggc, Tmod2, Cfh, Chil3, Nrnx1, Cldn1, Trem14, Clec1a, Clec1b, Clec4a2, Clec4d, Clec4e, Clec4g, Clec9a, Crispld2, Ehf, Nlrp3, Nid2, Sirpb1b, Tfec, Gm16685, Gm43916, Gpr141, Il10, Il13ra1, Il4, Ip6k3, Mab21l3, Itga8

Cell adhesion molecules (CAMs), Dendritic cells in regulating TH1 and TH2 development, Thymic stromal lymphopoietin (TSLP) pathway, Th1/Th2 differentiation pathway, Interleukin-4 signaling pathway, Asthma, Inflammatory response pathway, Cytokines and inflammatory response, Allograft rejection, Intestinal immune network for IgA production

### Negatively correlated

Cd8b1, Stat1, Rplp1, Ifit3, Gbp2, Slfn1, Cd8a, Npc2, Epsti1, Igtp, ligp1, Zbp1, Rtp4, Oasl2, Rplp0, Ifit1, Itm2b, B2m, Lef1, Isg15, AW112010, Saraf, Rpsa, Ly6a, Ms4a6b, Psmb9, Ifit3b, Gbp7, Cd3d, Irf7, Tspo, Ifi27l2a, Cd3g, Isg20, Ifi47, Rsad2, Herc6, Parp14, Trbc2, Rgs10, Gbp8, Art2b, Rnf213, Rpl41, Ddx60, Slfn5, Bst2, Oas3, Gbp4, Phf11b

Interferon signaling\*, Interferon alpha/beta signaling\*, Immune system signaling by interferons, interleukins, prolactin, and growth hormones\*, Immune system\*, Interferon-gamma signaling pathway\*, Interleukin-12-mediated signaling events\*, T helper cell surface molecules\*, CTL mediated immune response against target cells\*, Interleukin-17 signaling pathway\*, T cell receptor signaling in naive CD8+ T cells\*

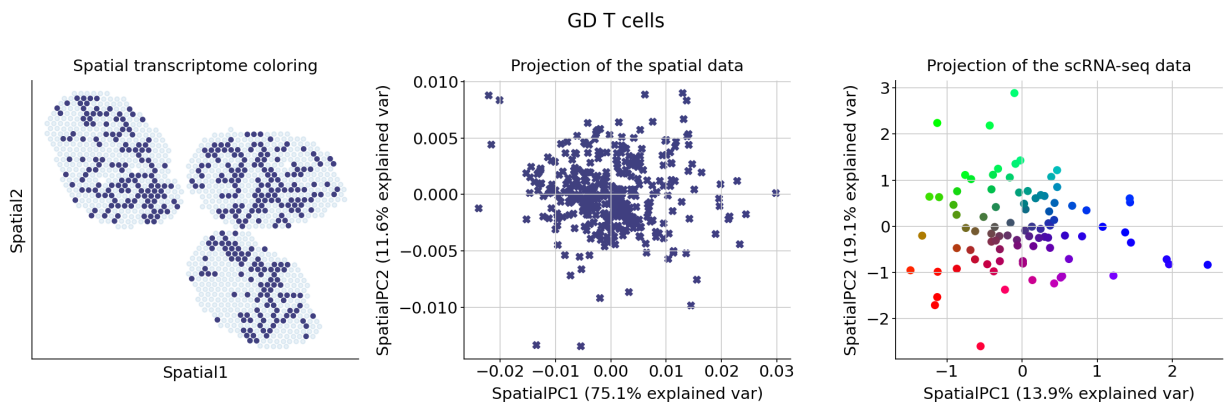



## Genes associated with SpatialPC1

### Positively correlated

Htra1, Clec5a, Scn3a, Cpne8, Sct, Hepacam2, Cp, Cox6a2, Col27a1, Notch3, Nostrin, Sema7a, Cmk1r1, Sept3, Cma1, Clec4n, P2ry13, Clec4g, Clec4d, Serpinb8, Clec4b1, Serpinb9b, Clec4a3, Serpinf1, Serpinh1, Hfe, Clec4a2, Nlrp3, Clec4a1, Clec1b, Scin, Hcar2, Hap1, Crisp1d2, Gramd2, Gria3, Gtse1, Guca1a, Oaf, Dclk1, Nusap1, Gzma, Nuggc, Nuf2, Dapl1, Rsad2, Dab2, Rtn1, Nudt17, Cystm1

Extracellular matrix organization, Interleukin-9 regulation of target genes, Collagen biosynthesis and modifying enzymes, Endochondral ossification, Maturation of Notch precursor via proteolytic cleavage, NOSTRIN-mediated endothelial NOS trafficking, Pre-NOTCH Processing in the endoplasmic reticulum, Interleukin-1-beta (IL-1b) processing pathway, TSP1-induced apoptosis in microvascular endothelial cell, Gap junction degradation

### Negatively correlated

S100a4, Fcgr1g, Klrb1b, Plekho2, Serpina3g, Kit, Cd7, Dscam, Ms4a4c, Odc1, Rasl11a, Slc15a3, S100a6, Psd2, Dll1, Sema4c, Napsa, Fam110a, Anxa2, Lgals3bp, Il2rb, S100a1, Lmna, Nrgn, Bst2, Emb, Hmgcs1, Ttn, Lgals1, Tmem176a, Tyrobp, Ifngr1, Gdpd5, Psap, Fes, Tmem176b, Sdc4, Cdkn1a, Clnd1, Cited4, Anxa1, Cdk6, Tnfsf12, Ncoa7, Cx3cr1, Spry2, Bcl2, Vegfa, Vim, Icosl

Cytokine-cytokine receptor interaction\*, Leptin influence on immune response\*, T cell receptor regulation of apoptosis\*, Fibroblast growth factor 1\*, EGFR1 pathway\*, Interleukin-2 signaling pathway\*, Interleukin-2/STAT5 pathway\*, C-Myb transcription factor network\*, Kit receptor transcriptional targets\*, Prostaglandin biosynthesis and regulation\*

## Genes associated with SpatialPC2

### Positively correlated

Depdc1a, Fcor, Fam20c, Fam83d, Fblim1, Fcgr2b, Fcgr4, Fcgrt, Fcrl5, Gpr4, Ffar4, Fgd2, Fignl1, Ngfr, Flt1, Rnd3, Mgl2, Fam149a, Fads3, Fabp4, F630028O10Rik, F13a1, F10, Exoc3l4, Rsad2, Exo1, Rtn1, Etl4, Espl1, Mgst1, Esco2, Eomes, Eno2, Rnase6, Flt3, Fn1, Gm12253, Melk, Rad51ap1, Rad54b, Rad54l, Rai14, Gpm6b, Gm7967, Gm6377, Gm5150, Gm43916, Mertk, Gm1673, Gm16685

Coagulation common pathway, Alpha-9 beta-1 integrin pathway, Homologous recombination, Fibrin clot formation (clotting cascade), RAGE pathway, Beta-1 integrin cell surface interactions, Axonal growth stimulation, Neuropilin interactions with VEGF and VEGF receptor, Extrinsic pathway, Complement and coagulation cascades

### Negatively correlated

Ptma, Cd81, Lmo4, Ipo5, Swap70, Jak2, Plscr1, Hes1, Hsp90ab1, Cd83, Pxdc1, Rasl11a, Efnb2, Cct3, Ttn, Mapkapk2, Hspa9, Kdm2b, Chchd10, Vwa5a, Sptssa, Rnf19b, Pdia3, Cacybp, Ndufa12, Oasl2, Bzw2, Rrad, Psd2, Tgm2, Eif2ak2, Fam129c, Cks1b, Gata3, Creg1, Smarcc1, Klf4, Srm, Ppia, Sbf2, C2, Pkig, Il18bp, Dgat2, Hivep1, Il15ra, Tnfaip3, Ninj1, Ifi2712a, Eea1

T cell receptor regulation of apoptosis, Immune system, Interleukin-2 signaling pathway, Notch signaling pathway, Toll receptor cascades, Innate immune system, TSH regulation of gene expression, Interleukin-27-mediated signaling events, Interleukin-1 regulation of extracellular matrix, Gastrin pathway

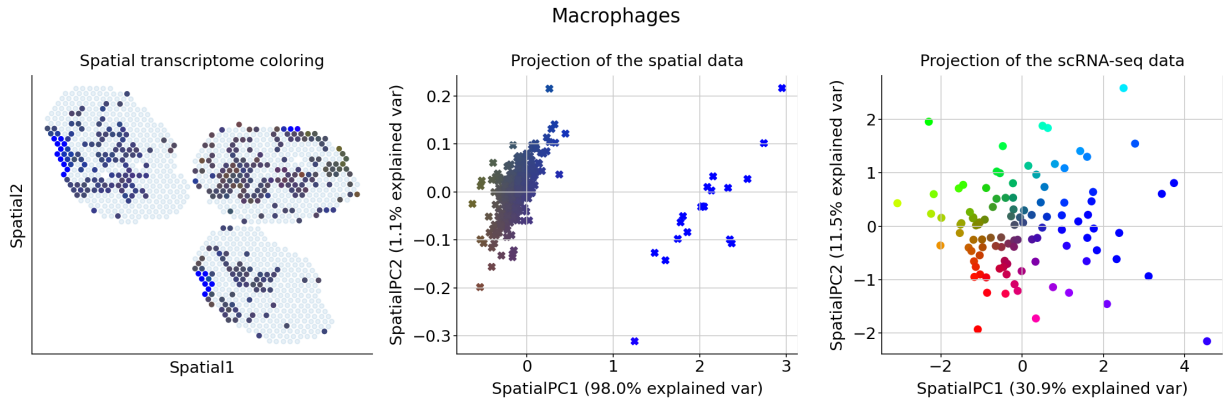

### Genes associated with SpatialPC1

#### Positively correlated

Eme1, Gzmb, Clec1a, Penk, Slfn4, Gria3, Slpi, Pdzd4, Cldn1, Pdia5, Cited4, Smpdl3b, Smtn, Smyd1, Snai1, Pde1c, Cish, Pgcd1, Chl1, Gzma, Snx22, Chil3, Chdh, Slco3a1, Grasp, Gramd2, Phlda3, Slamf1, Slamf7, Cntnap1, Gm7967, Gm8251, Cma1, Pianp, Slc16a3, Pi16, Phf24, Pgam2, Gpr137c, Slc22a23, Clec9a, Clec4g, Gpr141, Clec4d, Clec4b1, Slc46a3, Gpr4, Pcp4, Gzmc, Sirpb1c

Interleukin-9 regulation of target genes\*, Granzyme A-mediated apoptosis pathway, Prolactin regulation of apoptosis, Cell adhesion molecules (CAMs), Interleukin-12-mediated signaling events, Neurofascin interactions, Proepithelin conversion to epithelin and wound repair control, TSP1-induced apoptosis in microvascular endothelial cell, CHL1 interactions, Thymic stromal lymphopoietin (TSLP) pathway

#### Negatively correlated

Tmsb4x, Rplp0, Rps12, Rpsa, Rpl41, Rplp1, Fth1, Gpx1, Rps2, Gapdh, Ftl1, Sec61b, Cd200, Ppia, Lsp1, Tesc, Vim, Mif, Dap, S100a4, Lyz1, 1300017J02Rik, 2610528A11Rik, 2200002D01Rik, Capg, Peli2, Smim5, Dntt, Rnase6, Upb1, Cd7, Gsr, Havcr1, Bcl2a1b, Nme2, Uqcr11, Ank, Cox5a, Mt2, Iglc3, H2-Eb1, Hspa8, Nudt17, S100a6, Fscn1, Ppp1r14b, Apol10b, Cygb, Net1, Prg3

Translation\*, Cytoplasmic ribosomal proteins\*, Influenza viral RNA transcription and replication\*, Influenza infection\*, T cell receptor regulation of apoptosis\*, Nucleotide metabolism\*, Protein metabolism\*, Free radical-induced apoptosis\*, Activation of mRNA upon binding of the cap-binding complex and eIFs, and subsequent binding to 43S\*, Cap-dependent translation initiation

### Genes associated with SpatialPC2

#### Positively correlated

Pgam2, Rab44, Sox13, Eme1, Sox5, Klra6, Klra7, Klra8, Efnb3, Efna2, Ecm1, Ear2, Dll1, Dusp9, Dusp4, Klra9, Dtx1, Dscam, Dqx1, Spp1, Klrb1a, Spry2, Emilin2, Emp1, Eno2, Eomes, Slpi, Klk1, Fah, Klk1b27, F630028O10Rik, F2r, Klra1, Smpdl3b, Smtn, Smyd1, Snai1, Klra17, F10, Klra4, Exo1, Etl4, Erbb2, Snx22, Epha2, Dnm3, Dkk1, Tcrp-C4, Cpne7, Ctla2a

MAP kinase pathway regulation through dual specificity phosphatases, EGFR1 pathway, Extrinsic prothrombin activation pathway, Acute myocardial infarction, Axon guidance, Blood clotting cascade, Neural crest differentiation, Glycolysis, Activated NOTCH1 signaling in the nucleus, Gluconeogenesis

### Negatively correlated

Pla2g2d, Nhp2, Fabp5, Tagln2, Ndufc2, Tmem176a, Gapdh, Bcl2a1b, Tmem176b, Asb2, Traf1, Mt1, Cd63, Ncapd3, Ctsz, Clec5a, Sash1, Capg, Lyz2, Tspan13, Pdk3, Impdh2, Rps2, Cst7, Hspa8, Gpx1, Haus8, Mmp23, Eif5a, Gsap, 2900052N01Rik, Ran, Pgam1, Lyz1, Ftl1, Pla2g7, 2610528A11Rik, Phyhd1, Efhd2, Ctr9, C3, Atp1a3, Anxa3, Troap, M1ap, Aoah, Txndc17, Mcm3, Lgals3, Nudc

Lysosome vesicle biogenesis, Glycolysis, Gluconeogenesis, Ether lipid metabolism, Interleukin-5 regulation of apoptosis, Arachidonic acid metabolism, Clathrin derived vesicle budding, Glucose metabolism, Cycling of Ran in nucleocytoplasmic transport, Nucleotide metabolism

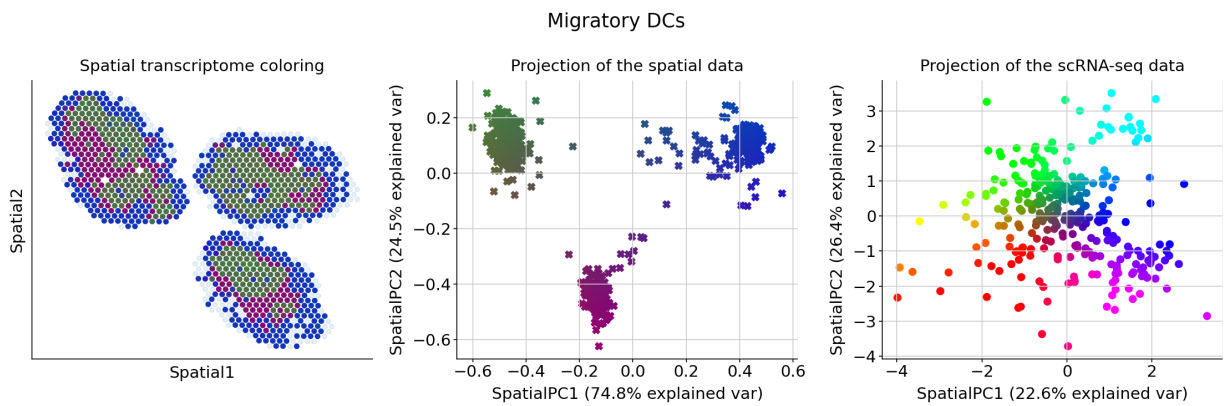

### Genes associated with SpatialPC1

#### Positively correlated

Il4, Apoc1, Clec10a, Ifng, Pcd1, Aatk, Ifitm6, Gcsam, Ifitm10, Penk, Pgam2, Pilrb1, Rgs13, Depdc1b, Depdc1a, Gm12972, Bpifb3, Gm13710, Pilra, Cma1, Tnfsf11, Parpbbp, Anln, Galnt3, Nid2, Sapcd2, Cfh, Itga8, Itga2, Trem2, Atp1a3, Trav3-3, Bhlhe41, Ptgs1, Nuggc, Il10, Samd3, Chdh, Chil3, Sox5, Chl1, Cmklr1, Pilrb2, Folr2, Rab3il1, Gpsm2, Stc2, Prg4, Havcr1, Prkar1b

Dendritic cells in regulating TH1 and TH2 development\*, Th1/Th2 differentiation pathway\*, AP-1 transcription factor network\*, Cytokines and inflammatory response\*, Allograft rejection\*, CHL1 interactions\*, T cell receptor signaling pathway, Folate metabolism, Leishmaniasis, Tob role in T-cell activation

#### Negatively correlated

S100a4, Fabp5, Tmem176a, Ptms, Sec61b, Syngn2, Sub1, Tmem176b, Ybx1, Ctsz, Actg1, Cd74, Tubb5, Tmsb4x, Ifi30, Nme2, H2-Ab1, Ftl1, Calm3, Lamp1, Bri3, Gapdh, S100a6, Atox1, H2-Eb1, Marcks1, Actb, Hnrnpa1, Avpi1, Ctss, Rpl41, Gpx1, Snrpd1, Rplp0, Calr, Nap1l1, Hspa8, Bst2, Rps12, B2m, Rpsa, Ywhae, Ppia, Srgn, Gpr183, Lsp1, Clic4, S100a11, Fscn1, Rps27l

Antigen processing and presentation\*, Translation\*, Phagosome\*, T cell receptor regulation of apoptosis\*, Influenza infection\*, Antigen processing: cross presentation\*, Protein metabolism\*, Cytoplasmic ribosomal proteins\*, Endosomal/vacuolar pathway\*, Interleukin-2 signaling pathway\*

## Genes associated with SpatialPC2

### Positively correlated

Cox4i2, Hist1h3c, Lingo4, Lipc, Coro2b, Tgm1, Cmklr1, Emp1, Cma1, Bcat1, Lrr1, Tcrg-C4, Rgs13, Bhlhe41, Bpifb3, Tbxas1, Pgam2, Ltb4r1, Tacstd2, Syndig1l, Penk, Hcar2, Havcr1, Styk1, Clec10a, Emilin2, Rassf6, Hp, Hlf, Klk1b27, Rab3il1, Klra1, E2f7, Rab44, Plcb1, Klra2, Klra4, Tnfsf11, Cryba4, Klra7, Klra8, Klra9, Klrb1a, Klrb1c, Klrc1, Klrg1, Pilrb2, Pilrb1, Atp1a3, Kntc1

Inhibition of platelet activation by aspirin, Eicosanoid metabolism, G-protein signaling through tubby proteins, Cytochrome P450 metabolism of eicosanoids, Gastric acid secretion, Cardiac muscle contraction, Activation of PKC through G-protein coupled receptors, Insulin secretion regulation by fatty acids bound to GPR40 (FFAR1), Salivary secretion, Phospholipase C signaling pathway

### Negatively correlated

Malat1, Neat1, Birc2, Slco5a1, Ankrd33b, Adam23, Aebp2, Tmcc3, Ccdc88a, Klf6, Dennd4a, Lrrk1, Swap70, Sbno2, Mical3, Fnbp1l, Tbc1d4, Chka, Adam11, Kdm2b, Atp11a, Nrgn, Ciita, Arhgap31, Gm15987, Zeb2, Etv3, Traf1, Cacnb3, Marveld1, Atp2b1, Col27a1, Rel, Lyst, Sbf2, Frmd4a, Zfp36, Nav1, Marcks, Plce1, Birc3, Icosl, Sned1, Nrnx1, Tmpo, Trim35, Tns1, Plxnc1, Il1r1, Zbtb20

CD40/CD40L signaling\*, TNF-alpha signaling pathway\*, Keratinocyte differentiation, HIV-1 Nef as negative effector of Fas and TNF, Apoptosis modulation and signaling, Small cell lung cancer, Mitochondrial role in apoptotic signaling, Tumor necrosis factor (TNF) pathway, Apoptosis, Induction of apoptosis through DR3 and DR4/5 death receptors

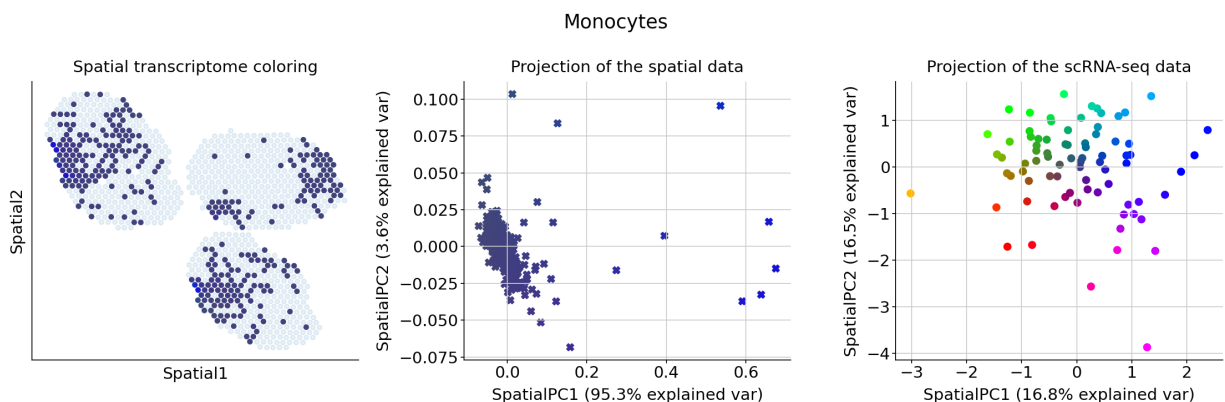

## Genes associated with SpatialPC1

### Positively correlated

Ighg3, Hmmer, Eme1, Emp1, Il1rl1, Il2ra, Eno2, Cd163l1, Cd160, Eomes, Il4, Stab2, Insm1, Stc2, Stil, Epha2, Ccr4, Strip2, Ptprm, Cd209d, Mdk, Neb1, Cd247, Ect2, Socs2, Rad51, Nefh, Sox13, Efnb3, Sox5, Spag5, Neil3, Cd5l, Spc25, Cd59a, Nek2, Cd300c, Melk, Il18r1, Spp1, Iqgap3, Styk1, Ptprk, Ptprf, Tcrg-C1, Mxd3, Tcrg-C4, Cblc, Hist1h2ag, Capsl

Interleukin-12-mediated signaling events\*, Jak-STAT signaling pathway\*, Tob role in T-cell activation\*, Th1/Th2 differentiation pathway\*, Selective expression of chemokine receptors during T-cell polarization\*, Interleukin-12/STAT4 pathway\*, Regulation of NFAT transcription factors\*, Type I interferon (interferon-alpha/beta) pathway\*, Hyaluronan metabolism, CD8/T cell receptor downstream pathway

### Negatively correlated

Ppia, Ptma, Atox1, Smc2, Rps2, S100a4, Ifngr1, Cdk14, Spdl1, Mcm10, Tuba1c, Cbx5, Chaf1a, Cdk4, Eif4ebp1, Eif4a1, Rplp1, Tuba1a, Pira2, Exo1, Dbn1, Rad51ap1, Kntc1, Ube2t, Dscc1, Cenpp, Odc1, St8sia4, Cd1d1, Hnrnpab, Ptpn22, Ndufc2, Shmt1, Rexo2, Tacc3, Rrm1, Dhfr, Cbfa2t3, Hmgb1, Ncapg, Uqcc2, Il1b, Nr4a3, Pip4k2a, Cd6, Fut7, Rplp0, Sptssa, Eif1ax, Plxnc1

Translation\*, Myc active pathway\*, Activation of mRNA upon binding of the cap-binding complex and eIFs, and subsequent binding to 43S\*, Protein metabolism\*, Cap-dependent translation initiation\*, Cell cycle\*, Aurora B signaling\*, Cytoplasmic ribosomal proteins\*, Folate and pterine metabolism\*, Translation factors\*

## Genes associated with SpatialPC2

### Positively correlated

Hba-a1, Lefty1, Ryr3, Lipc, Samd3, Lingo4, Sapcd2, Etl4, Ccne1, Ccna2, Scin, Scn3a, Ccl22, Sema4c, Klri2, Ccl17, F2r, Sept3, Ccdc80, Fads3, Lcn4, Fah, Laptm4b, Serpinb9b, Serpine2, Cblc, Ccne2, Ccr10, Esco2, Ccr4, Rassf6, Ly6k, Cd5l, Eomes, Cd59a, Ly6c1, Epha2, Rgs13, Rgs16, Rgs9, Cd300c, Lta, Cd247, Cd209d, Lrrc32, Rorc, Lrr1, Cd163l1, Cd160, Erbb2

Binding of chemokines to chemokine receptors\*, G0 and early G1 pathway\*, Peptide G-protein coupled receptors\*, Cytokine-cytokine receptor interaction, G alpha q pathway, Cyclin A-Cdk2-associated events at S phase entry, E2F transcription factor network, Chemokine signaling pathway, Prostate cancer, Signaling events mediated by PRL

### Negatively correlated

Prkar1b, Gfpt1, Gfra2, Zc3h12c, Dusp5, Fosb, Chst2, Ly75, Il10, Anln, Hsd11b1, Tnfrsf8, Egr1, Ddx60, Hsph1, Fam20c, Stmn1, Kcnk6, Tmem26, Gpr157, Pfkfb3, Slc6a6, Sirpa, Adgrg6, Gpm6b, Sdc3, Cd274, Tox, Tnfaip3, Dusp1, Nuak1, Ccnd2, Ehf, B2m, Prg3, Pmaip1, Rai14, Marcks1, Art2b, Tgm1, Susd2, Tspan3, Cd81, Trpm2, Rgs1, Gm42418, Marcks, Mmp23, Inpp4b, Pvr

BDNF signaling pathway\*, T cell receptor regulation of apoptosis\*, AP-1 transcription factor network\*, Malaria, CD40L signaling pathway, TNFR2 signaling pathway, Interleukin-2 signaling pathway, TSH regulation of gene expression, Ovarian infertility genes, Stathmin and breast cancer resistance to antimicrotubule agents

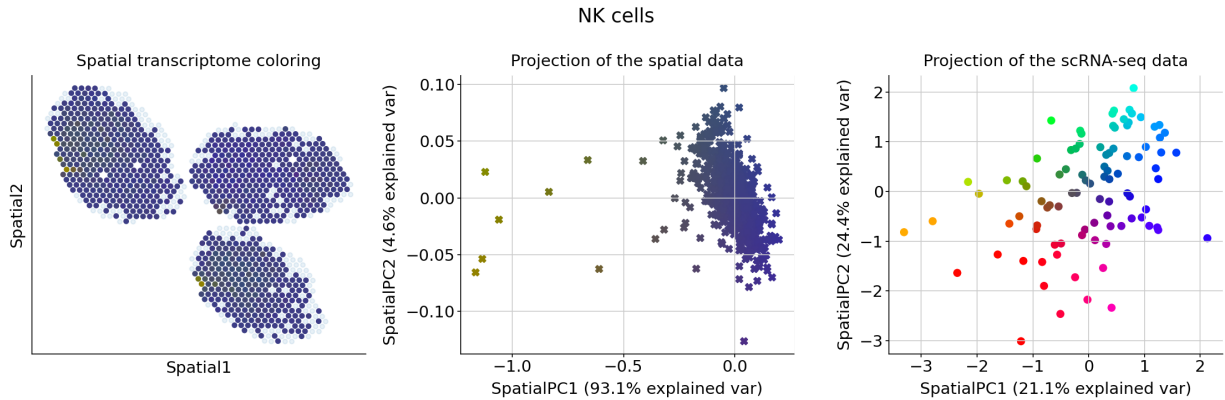

## Genes associated with SpatialPC1

### Positively correlated

1300017J02Rik, Gprc5c, Gm5150, Gpm6b, Gpr157, Rem1, Gpr162, Gpr35, Gpr4, Gpx3, Prg3, Rbm47, Gramd2, Gria3, Rassf6, Rasl11a, Rasal2, Gsta4, Gm43916, Rgs13, Gm1673, Rgs9, Rpl39l, Gatm, Gbp2b, Rorc, Gcsam, Gda, Gdpd1, Gfra2, Gm10851, Gm12253, Rnf144b, Gm12972, Gm13710, Rnd3, Gm16685, Gstm5, Gtse1, Guca1a, Hlx, Ptafr, Psrc1, Hmgn3, Hp, Psd2, Hpgd, Hpn, Hpse, Hs3st1

Glutathione metabolism, Visual signal transduction: cones, Visual signal transduction: rods, Glutathione conjugation, Phototransduction, Heparan sulfate/heparin glycosaminoglycan (HS-GAG) metabolism, Metapathway biotransformation, G alpha q pathway, Phase II of biological oxidations: conjugation, Creatine metabolism

### Negatively correlated

Rsad2, Tcrg-C4, Usp18, Igtp, Il2ra, Isg15, Ifit1, Il7r, Cxcl10, Ifi44, Rnf19b, Ifi204, Gpr183, Cxcr6, Ckb, Klk8, Irf7, Fas, Ly6a, Parp12, Cmpk2, Il6st, Ifit3, Sema4c, Zbp1, Herc6, Klrc1, Myo6, Iigp1, Gbp2, Oas3, Maf, Hopx, Cd82, Xcl1, Dscam, Cd3e, Gbp5, Ifih1, Socs3, Ikzf2, Cish, Tmem176b, Isg20, Socs1, Foxp3, Lilrb4a, Thy1, Batf, Furin

Immune system signaling by interferons, interleukins, prolactin, and growth hormones\*, Interferon alpha/beta signaling\*, Immune system\*, Interferon signaling\*, Interferon-gamma signaling pathway\*, Interleukin-2 signaling pathway\*, Leptin influence on immune response\*, Thymic stromal lymphopoietin (TSLP) pathway\*, Cytokine-cytokine receptor interaction\*, Interleukin-4 regulation of apoptosis\*

## Genes associated with SpatialPC2

### Positively correlated

1300017J02Rik, Htr7, Hpgd, Hpn, Sash1, Hpse, Sapcd2, Hs3st1, Htra1, Igfbp7, I830077J02Rik, Ryr3, Ifitm6, Ifnlr1, Igf1, Igfbp4, Hp, Hmgn3, Hlx, Hist1h3c, Scin, Scn3a, Hfe, Sct, Hepacam2, Hcar2, Hbegf, Hba-a1, Havcr2, Havcr1, Hap1, Hacd4, Sept3, Rtn1, Igba, Guca1a, Rnd3, Itga8, Itga9, Itgb8, Rnf144b, Izumo1r, Jag1, Jchain, Ighg3, Kcnj10, Kcnj2, Kcnk6, Rgs9, Zmynd15

Integrin family cell surface interactions\*, Dilated cardiomyopathy\*, Ghrelin-mediated regulation of food intake and energy homeostasis, Insulin-like growth factor (IGF) activity regulation by insulin-like growth factor binding proteins (IGFBPs), Arrhythmogenic right ventricular cardiomyopathy (ARVC), ECM-receptor interaction, Integrin cell surface interactions, Visual signal transduction: cones, Visual signal transduction: rods, Plexin D1 signaling

### Negatively correlated

Hsp90ab1, Odc1, Cct3, Nhp2, Eif5a, Hnrnpab, Rsl1d1, Kdm6b, Ftsj3, Fosl2, Hnrnpa1, Nr4a1, Smco4, Tnfrsf21, Nop58, Bzw2, C1qbp, Gm26532, Tagap, Tuba1b, Srm, Dtl, Mrto4, Nop16, Eif4a1, Nfkbiz, Ncl, Gadd45b, Ndufab1, Shmt1, Nfkbid, Ipo5, Hells, Vegfa, Prmt1, Uqcc2, Timeless, Mettl1, Apex1, Ran, Hdgf, Dkc1, Ifng, Cd69, Tex2, Mybbp1a, Hsph1, Smc2, Psm7, Npm1

Myc active pathway\*, T cell receptor regulation of apoptosis\*, Telomere extension by telomerase\*, Aurora B signaling\*, Polyamine metabolism, Telomerase regulation, Interleukin-2 signaling pathway, Hypertrophy pathway, Urea cycle and metabolism of amino groups, Amino acid metabolism

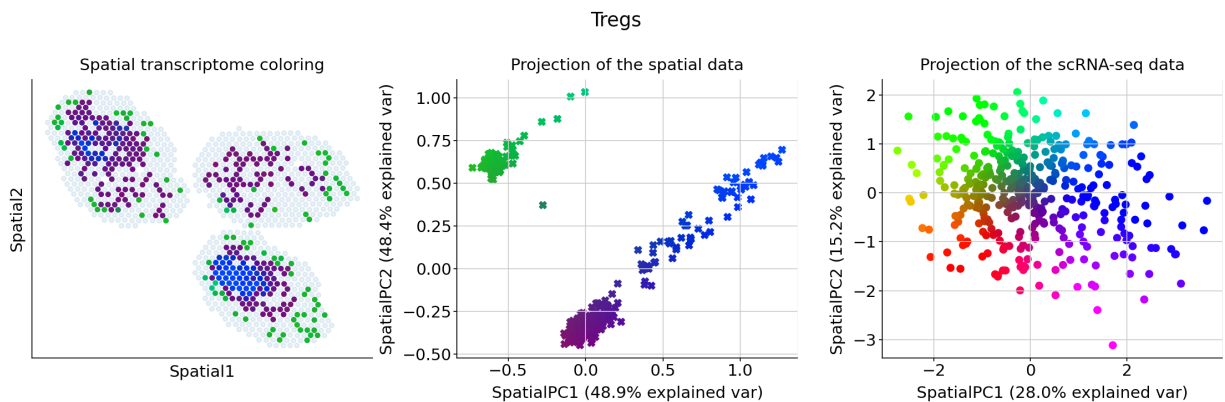

### Genes associated with SpatialPC1

#### Positively correlated

Emilin2, Myof, Npl, Notch3, Arpin, Nlrp3, Nid1, Nek2, Cdh2, Ncr1, Mylk, Nrnx1, Arhgef40, Arhgef10l, Arhgap28, Mycl, Stap2, Msr1, Ms4a8a, Ms4a7, Cd5l, Nuggc, Thbd, Cd300lb, Pdzd4, Snx22, Pdia5, Pde8b, Cd300c, Pcp4, Pbx1, Sox13, Papss2, Nupr1, Cd300ld, Cd302, P2ry6, P2ry13, Cd33, Cd36, Nxp4, Spic, Mreg, Strip2, Mrc1, Lrr1, Tbc1d9, Mab21l3, Ltc4s, Cldn1

Nucleotide-like (purinergic) G-protein coupled receptors, Cell adhesion molecules (CAMs), Phagosome, Maturation of Notch precursor via proteolytic cleavage, Pre-NOTCH Processing in the endoplasmic reticulum, Interleukin-1-beta (IL-1b) processing pathway, Antigen processing: cross presentation, Cell

junction organization, Cross-presentation of particulate exogenous antigens (phagosomes), TSP1-induced apoptosis in microvascular endothelial cell

#### **Negatively correlated**

Tnfrsf4, Il2ra, Ikzf2, Ikzf4, Foxp3, Izumo1r, Tnfrsf18, Igf1r, Tiam1, Tnfrsf9, Lrrc32, Dusp1, Swap70, Cd81, Ptma, Hivep3, Gpr83, Ecm1, Malat1, Cd83, Itgb8, Arhgap20, Ift80, Tbc1d4, Kdm6b, Snx18, Junb, Mical3, Cd4, Cish, Chchd10, Dst, Gnl3, Rel, Smc4, Mettl1, Rgs10, Myo1e, Rgs2, Plagl1, Lta, Gm42418, Pim1, Eea1, Mrps6, Gsta4, Gsto1, Spred1, Nfkbia, Myc

T cell receptor regulation of apoptosis\*, Thymic stromal lymphopoietin (TSLP) pathway\*, Interleukin-9 regulation of target genes\*, CD8/T cell receptor downstream pathway\*, Interleukin-2/STAT5 pathway\*, TNFR2 signaling pathway\*, Interleukin-2 signaling pathway\*, Jak-STAT signaling pathway\*, Antigen-activated B-cell receptor generation of second messengers\*, Wnt interactions in lipid metabolism and immune response\*

#### **Genes associated with SpatialPC2**

##### **Positively correlated**

Smim5, Slc1a3, Mgl1, Mgl2, Mfsd7a, Cd163l1, Cd14, Sh2d1b1, Met, Mertk, Mefv, Fcgr3, Siglec1, Fcgr4, Sirpb1b, Sirpb1c, Fcrl5, Ska1, Ffar2, Mcemp1, Ffar4, Slamf8, Slamf9, Slc11a1, Slc16a9, Mgst1, Serpinh1, Fcgr1, Sct, Msr1, Cd36, Sash1, Cd33, Cd302, Cd300ld, Ms4a8a, Ms4a7, Scn3a, Cd300lb, Cd300c, Mmp19, Fam149a, Fblim1, Cd209d, Sept3, Mreg, Mrc1, Mmp23, Cd209a, Serpinb8

Phagosome, Hematopoietic cell lineage, Malaria, Acyl chain remodeling of diacylglycerol and triacylglycerol, Antigen processing: cross presentation, Cross-presentation of particulate exogenous antigens (phagosomes), TSP1-induced apoptosis in microvascular endothelial cell, Sema4D-mediated inhibition of cell attachment and migration, IKK complex recruitment mediated by RIP1, Hormone-sensitive lipase (HSL)-mediated triacylglycerol hydrolysis

##### **Negatively correlated**

Tcf7, Rps12, Pip4k2a, Dapl1, Themis, Rplp0, Rpl41, Itgal, Cd8b1, Cd8a, Dap, Evi2a, Slc25a4, Gapdh, Nsg2, Cd9, Tnfsf11, Ppic, Atpif1, Rpsa, Pkg1, Cd200, Ptpn22, Crtam, Cd160, Ccnb2, Nkg7, Gpm6b, Smtn, Tbc1d4, Actn1, Xcl1, Fyn, Cd3d, Sh2d1a, Scd2, Ddt, Rgcc, Msrb1, Zyx, Txn1, 2310001H17Rik, Mxd4, Thy1, Cst7, Ube2c, Serpinb6b, Lag3, Casp3, Vdac1

T helper cell surface molecules\*, Immunoregulatory interactions between a lymphoid and a non-lymphoid cell\*, Interleukin-2 signaling pathway\*, Interleukin-4 regulation of apoptosis\*, T cell receptor regulation of apoptosis\*, Adaptive immune system\*, Cytoplasmic ribosomal proteins\*, TSP1-induced apoptosis in microvascular endothelial cell\*, Influenza viral RNA transcription and replication\*, T cell receptor signaling in naive CD8+ T cells\*



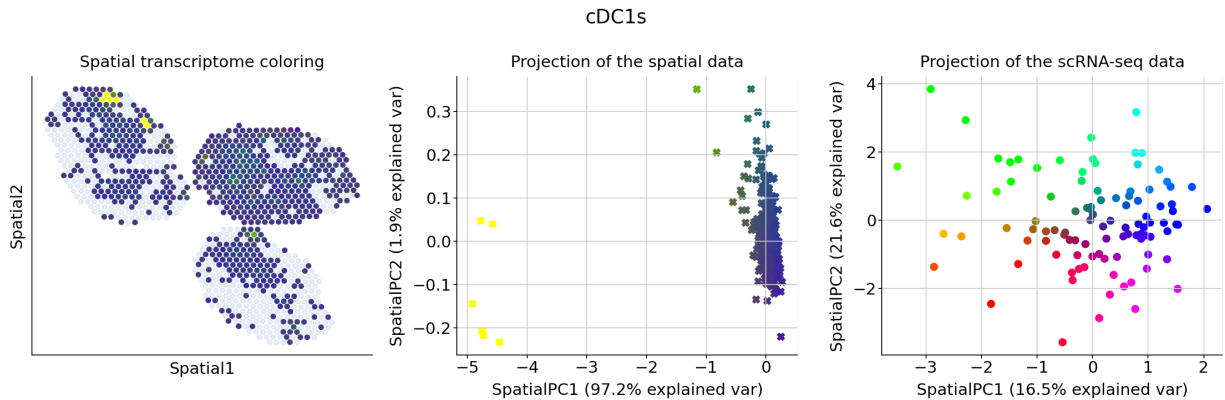

## Genes associated with SpatialPC1

### Positively correlated

*Itgb8, Spon1, Klra17, Klra1, Klk1b27, Csf3r, Sned1, P2ry13, Kdr, Kcnj10, Kcnc1, Izumo1r, Sox13, Cd160, Sox5, Prkar1b, Sparc, Palld, Itga9, Atp2a1, Klra2, Atp2b4, Klrc1, Crmp1, Lcn4, Crtam, Ppp1r3d, Cd163l1, Cryba4, Klrg1, Klrb1c, Klra4, Klrb1a, Klra9, Klra8, Klra7, Slfn4, Slpi, Klra6, Itga2, Plagl1, Lifr, Il7r, Ifng, Aqp9, Ifitm10, Ptpm, Tcrg-C1, Tcrg-C2, Tcrg-C4*

Integrin family cell surface interactions\*, Jak-STAT signaling pathway, Leptin influence on immune response, Immunoregulatory interactions between a lymphoid and a non-lymphoid cell, Reduction of cytosolic calcium levels, Cytokine-cytokine receptor interaction, Arrhythmogenic right ventricular cardiomyopathy (ARVC), Platelet calcium homeostasis, ECM-receptor interaction, Integrin cell surface interactions

### Negatively correlated

*Stmn1, Ube2c, Birc5, Aurkb, Top2a, Cdca8, Nusap1, Kif11, Hmgb2, Cks1b, Mki67, Ccnf, Ptma, Pbk, Spc24, Hist1h4d, Tk1, Hist1h2ae, Bub1b, Plk1, Cdk1, Prc1, Incenp, Tubb4b, Cenpl, Ndc80, Ccnb1, Cit, Aurka, Rrm2, Tacc3, Cdca3, Kif15, Ttk, Cdc25b, Esco2, Rfc5, Cks2, Asf1b, Cdca2, Bub1, Cenpm, Cdc20, Smc2, Lockd, Hjurp, Hist1h3c, Mxd3, Melk, Fbxo5*

Cell cycle\*, Polo-like kinase 1 (PLK1) pathway\*, M phase pathway\*, DNA replication\*, Aurora B signaling\*, APC/C-mediated degradation of cell cycle proteins\*, Phosphorylation of Emi1\*, FOXM1 transcription factor network\*, APC/C activator regulation between G1/S and early anaphase\*, APC/C- and Cdc20-mediated degradation of Nek2A\*

## Genes associated with SpatialPC2

### Positively correlated

*Gsta4, Thbd, Klrc1, Nid1, Gm12253, Klrg1, Gm12972, Cd160, Ngfr, Eomes, Adgre4, Enpp2, Cald1, Serpinb9b, Thbs1, Gm14085, Notch3, Serpinh1, Gm1673, Neb, Ar, Lcn4, Ccr4, Aqp9, Clec4g, Tdrp, Ndnf, Tcrg-C4, Tcrg-C2, Cdkn2a, Klrb1c, Sparc, Klk1b27, Gdpd1, Ryr3, Actg2, Cma1, Dclk1, Actn2, Nrnx1, Samd3, Hcar2, Cadm3, Et14, Hbegf, Cd163l1, Tmem26, Klrb1a, Klra1*

Muscle contraction\*, ID regulation of gene expression, Response to elevated platelet cytosolic calcium, Smooth muscle contraction, Senescence and autophagy, Immunoregulatory interactions between a lymphoid and a non-lymphoid cell, FRA pathway, Striated muscle contraction, Bladder cancer, Gastrin pathway

### Negatively correlated

Psap, Ece1, Cd74, Rrbp1, Gns, H2-Ab1, Poglut1, Hsp90b1, Adam8, Slamf7, Mpeg1, Havcr2, Neat1, Ifngr1, Clec9a, Anpep, Procr, Selplg, Csf2rb, Xcr1, Slc8b1, Zfp516, Fgl2, Myadm, Sbno2, H2-Eb1, Camk1d, Pdia3, Ppt1, Trpm2, Herpud1, Lyn, Flt3, Ahr, Nabp1, Tlr11, P2ry6, Tbc1d8, Itm2c, Ly75, Nr4a1, Rp2, Tbc1d9, P2ry14, Naga, Pik3cb, Sdc3, Zfp366, Icam1, Ehbp111

Interleukin-2 signaling pathway\*, Alpha-M beta-2 integrin signaling, Interleukin-3, interleukin-5, and GM-CSF signaling, Lysosome, Adhesion and diapedesis of granulocytes, Immune system signaling by interferons, interleukins, prolactin, and growth hormones, Nucleotide-like (purinergic) G-protein coupled receptors, Immune system, Protein processing in the endoplasmic reticulum, Cells and molecules involved in local acute inflammatory response

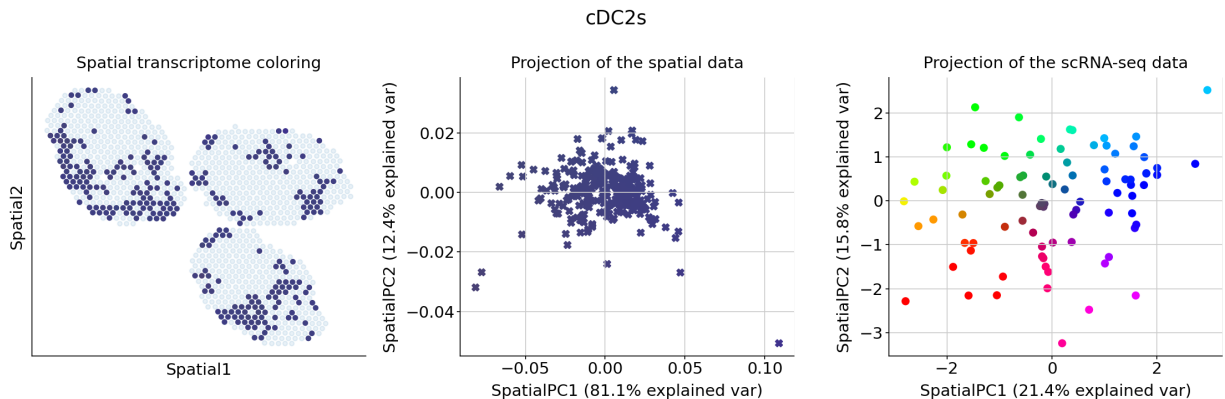

### Genes associated with SpatialPC1

#### Positively correlated

Tcrp-C4, Fasl, Fam83d, Arl4d, Lingo4, Lmo7, Prp4, Tmem26, Etl4, Prp2, Ltc4s, Asns, Clec4e, Cald1, Tlr3, Erbb2, Ppof2, Enpp2, Popdc2, Mab21l3, Map2, Mdk, Cma1, Arhgap20, Fblim1, Plekhg1, Tnfrsf8, Ptpn13, Klra4, Klra6, Klra7, Klra8, Klra9, Klrb1c, Klrc1, Klrc2, Ptgs1, Stab1, Slc16a9, Cbr2, Slc1a3, Tnnt2, Psd2, Cited4, Apoc1, Apol10b, Laptm4b, Tnfrsf9, Plscr4, Mgl1

Eicosanoid biosynthesis, Ras-independent pathway in NK cell-mediated cytotoxicity, T cell receptor regulation of apoptosis, Muscle contraction, Arachidonic acid metabolism, GRB7 events in ERBB2 signaling, Acyl chain remodeling of diacylglycerol and triacylglycerol, TGF-beta regulation of extracellular matrix, Adherens junction cell adhesion, Antigen processing and presentation

#### Negatively correlated

Malat1, Sirpa, Fyb, Gm42418, St8sia6, Trps1, Tnfrsf1b, Inpp4b, Tcf7, Gda, Cd5, Myof, Pld4, Ddhd1, Neat1, Ptpn22, Lilrb4a, Nfkbiz, Anxa3, Txk, Tspan33, Epb41l2, Stat1, Pdlim4, Pla2g7, Cxcl16, Cd247, Birc3, Sdc4,

Skap1, H2-Eb1, Lck, Trac, Gbp8, Lcp2, Dnase1l3, Ly75, Fam49a, Itgax, Hist1h1c, Rel, Tarm1, Cdk14, Ehf, Cd3d, Ptafr, Cd28, Ms4a4b, Gbp4, Lef1

Generation of second messenger molecules\*, Interleukin-2 signaling pathway\*, T cell receptor signaling in naive CD4+ T cells\*, T cell activation co-stimulatory signal\*, T cell receptor signaling in naive CD8+ T cells\*, Costimulation by the CD28 family\*, PD-1 signaling\*, HIV-induced T cell apoptosis\*, Interleukin-5 regulation of apoptosis\*, Lck and Fyn tyrosine kinases in initiation of T cell receptor activation\*

## Genes associated with SpatialPC2

### Positively correlated

Gdpd1, Klrc1, Mdk, Efnb3, Lingo4, Dntt, Tnfrsf9, Tnfrsf8, Ncr1, Ncam1, Ccr10, Dnm3, Mgst1, Dll1, Plekhg1, Klrc2, Hpn, Cd163l1, Tmem26, Prg2, Mgl1, Hp, Sox13, Enpp2, Tnnt2, Klrb1c, Klra7, Cald1, Trem2, Trdc, Crmp1, Erbb2, Plscr4, Gpx3, Igfbp7, Neb1, Klra8, Klra9, Gramd2, Neb, Cbr2, Ifitm10, Ccl12, Ccl17, Rorc, Src, Gsta4, Ptgs1, Cma1, Klrg1

Axon guidance\*, Muscle contraction, Glutathione metabolism, Developmental biology, Semaphorin interactions, Ras-independent pathway in NK cell-mediated cytotoxicity, L1CAM interactions, Glutathione conjugation, Recycling pathway of cell adhesion molecule L1, Interleukin-7 interactions in immune response

### Negatively correlated

Pld4, Ppt2, Tgfb1, Il1rn, Fbxo5, Lst1, Lyz2, Ube2c, Dlgap5, Tspan33, Birc5, Cdca3, Cd63, Hmox1, Pla2g7, Plxnd1, Bub1b, Pltp, Clec4a3, Mmp12, Cdk1, Clec4a1, Slc7a11, Mxd3, Cd81, Gas2l3, Gngt2, Sat1, Psap, E2f2, Emb, Nuf2, Hist1h2ae, Ccl6, Hck, Nr1h3, Depdc1a, Ccnb2, Tpi1, Slamf8, Sirpb1b, Siva1, Ear2, Fcgr3, Pid1, Mki67, Kif4, Cxcl16, Ckap2, Myof

Cell cycle\*, APC/C activator regulation between G1/S and early anaphase\*, APC/C- and Cdc20-mediated degradation of Nek2A\*, APC/C-mediated degradation of cell cycle proteins\*, Cyclin B2-mediated events\*, Phosphorylation of Emi1\*, M phase pathway\*, FOXM1 transcription factor network\*, DNA replication\*, Polo-like kinase 1 (PLK1) pathway\*

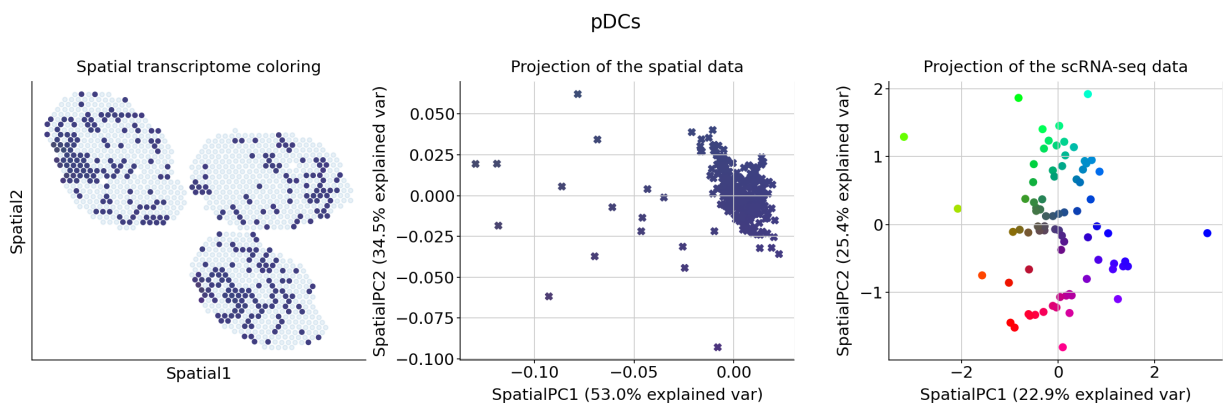

## Genes associated with SpatialPC1

### **Positively correlated**

1300017J02Rik, Hist1h2ag, Htr7, Samd3, Hpn, Hpgd, Sapcd2, Hp, Sash1, Hmnr, Hmgb3, Hlf, Hk3, Scin, Hist1h3c, Hist1h2bj, Hepacam2, Enpp2, Hcar2, Hbegf, Hbb-bt, Hap1, H1fx, Gzmm, Gzmc, Gzmb, Gzma, Gtse1, Serpinb8, Gsta4, Serpinb9b, Serpine2, Htra1, Ryr3, Ifit3b, Ifitm1, Jag1, Itgb8, Itgae, Rgs16, Itga9, Rgs9, Itga8, Itga2, Itga1, Iqgap3, Il4, Rnf144b, Il1r1l, Il1r1

Integrin family cell surface interactions\*, ECM-receptor interaction\*, Integrin cell surface interactions\*, Actin cytoskeleton regulation\*, Integrin-mediated cell adhesion\*, Plexin D1 signaling\*, Arrhythmogenic right ventricular cardiomyopathy (ARVC)\*, Dilated cardiomyopathy\*, Arf6 integrin-mediated signaling pathway\*, Interleukin-12-mediated signaling events\*

### **Negatively correlated**

Cybb, Ifi204, Grn, Cyb561a3, Lair1, Mpeg1, Tcf4, Xbp1, B2m, Melk, Cbr3, Metrnl, Trpm2, Cd14, Tnfrsf12, Gpr141, Guca1a, E2f2, Ccl17, Tgm2, Klra2, Bambi, 1700025G04Rik, 2610528A11Rik, Prdm1, Fcgr3, Il1b, Msr1, Rtn1, 1600010M07Rik, Cd300lb, Ffar2, Slc7a11, Pid1, Pilrb2, Cd300ld, Ip6k3, Tmem51, Sirpb1b, Sirpb1c, C3, Trem1l4, Tgfbi, Thbs1, Csf1r, Celf4, Clec4n, Ms4a7, Clec4a1, Clec4a2

Beta-1 integrin cell surface interactions\*, Phagosome\*, Wnt interactions in lipid metabolism and immune response, Hematopoietic cell lineage, Fibroblast growth factor 1, Integrin beta-2 pathway, Cytokine-cytokine receptor interaction, Bladder cancer, Beta-3 integrin cell surface interactions, Type II interferon signaling (interferon-gamma)

### **Genes associated with SpatialPC2**

#### **Positively correlated**

1300017J02Rik, Ifitm10, Il18bp, Il10, Ikzf4, Ighg2b, Igha, Igfbp4, Igf1, Serpinb8, Ifnlr1, Serpinb9b, Serpine2, Ifng, Ifitm6, Ifitm1, Fignl1, Ifit3b, Htra1, Htr7, Hpn, Hpgd, Hp, Hmnr, Hmgb3, Hlf, Hk3, Sidt1, Siglec1, Hist1h3c, Il18r1, Il18rap, Il1r1, Il1r1l, Klra3, Klra1, Kif4, Kif2c, Kif20a, Kif18b, Kif14, Ryr3, Kif11, Khdc1a, Zmynd15, Kcnj2, Samd3, Kcnj10, Sapcd2, Sash1

Interleukin-12-mediated signaling events\*, Th1/Th2 differentiation pathway\*, Kinesins\*, Cytokine-cytokine receptor interaction\*, Interleukin-23-mediated signaling events\*, Interleukin-12/STAT4 pathway\*, Ghrelin-mediated regulation of food intake and energy homeostasis, Dendritic cells in regulating TH1 and TH2 development, Insulin-like growth factor (IGF) activity regulation by insulin-like growth factor binding proteins (IGFBPs), Hypertrophy pathway

#### **Negatively correlated**

Actb, Isg15, Slfn5, Phf11b, Oasl2, Ifi44, Ifitm3, Usp18, Tagln2, Sdc3, Atp5g3, Cmpk2, Psme2, Parp14, Rasa4, Pkib, Actg1, Atp6v0c, Iigp1, Cd7, Ifi47, Evi2a, Fam129a, Pfkp, Dnajc7, Lgals1, Hnrnpab, Irf7, Calm1, Gm42418, Casp3, Acer3, Rtp4, Prkcd, Plac8, Clec9a, Crip1, Atp5g1, Uqcrq, Rsad2, Atad5, AY036118, Skap2, Traf1d1, Eif2ak2, Zbp1, Taldo1, Ass1, Rnh1, Cd68

Interleukin-2 signaling pathway\*, Interferon signaling\*, Interferon alpha/beta signaling\*, Myometrial relaxation and contraction pathways\*, Alzheimer's disease\*, Immune system signaling by interferons,

interleukins, prolactin, and growth hormones\*, Type II interferon signaling (interferon-gamma), Parkinson's disease, Vibrio cholerae infection, Oxidative phosphorylation

# Supplementary Note 2: DestVI report for the tumor data

## Step A: automatic thresholding

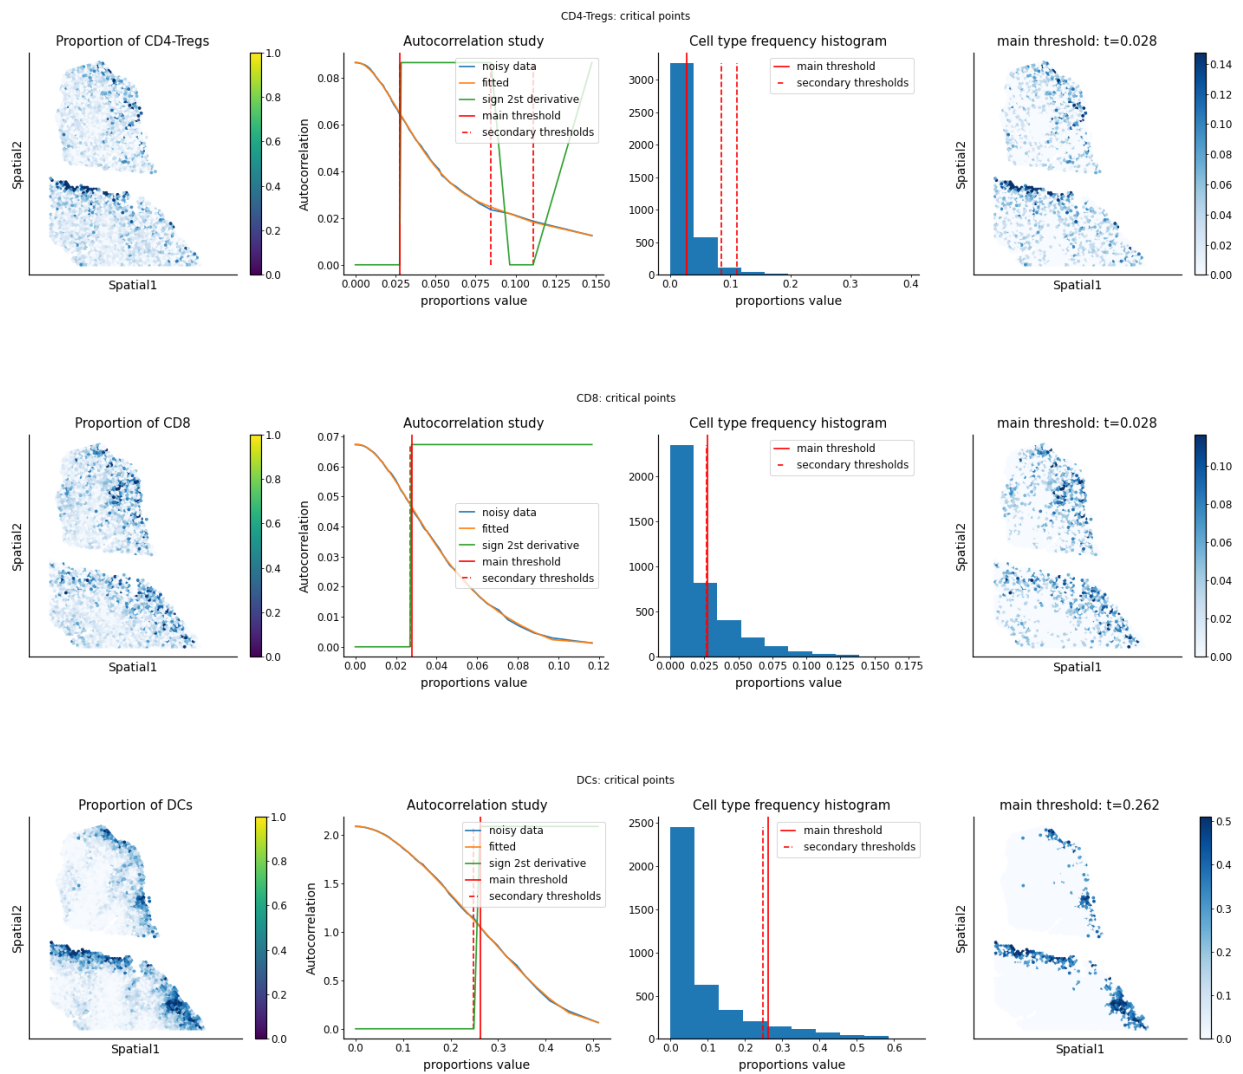

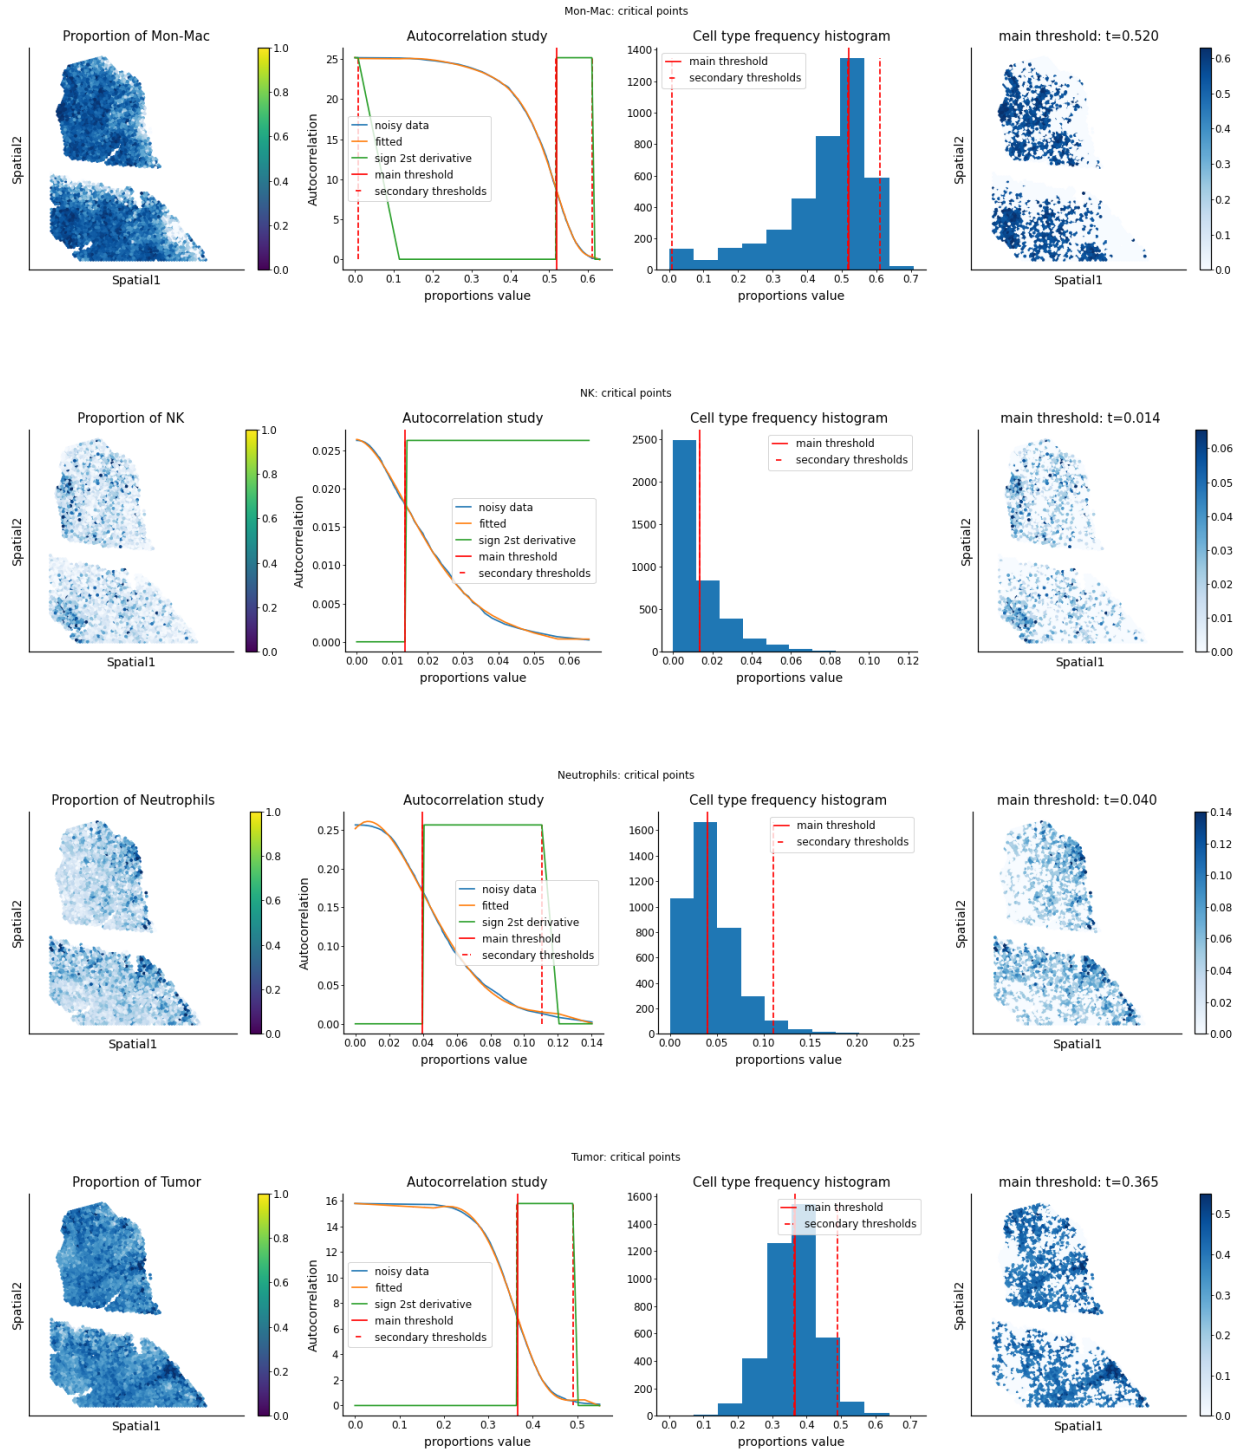

## Step B: weighted PCA and GSEA

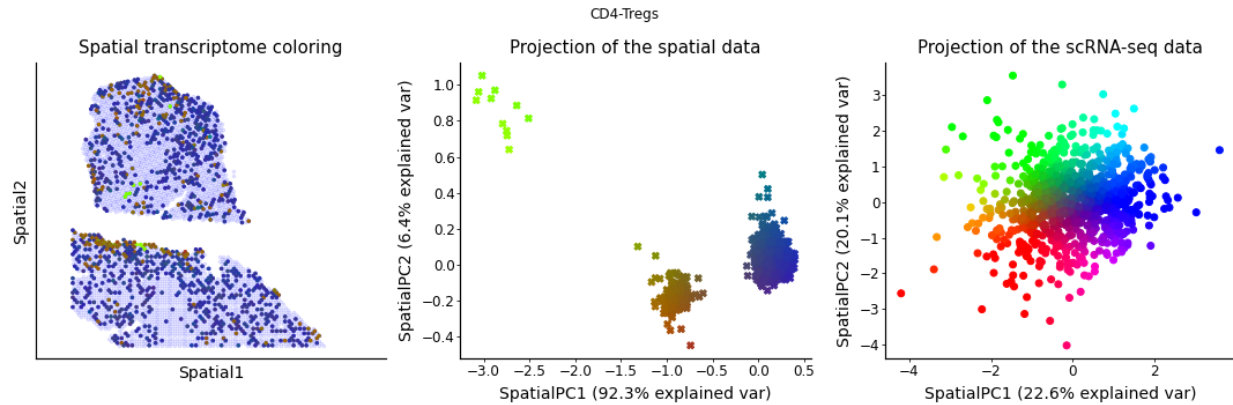

### Genes associated with SpatialPC1

#### Positively

Fgf7, Runx2os2, Gli3, Glrp1, Gm10244, Gm10501, Rslcan18, Gm12689, Gm12708, Gm13056, Gm13199, Gm13391, Gm13470, Gm13496, Gm13713, Rps13, Gm14010, Gm14154, Gm14207, Gm14636, Gm15056, Gm15518, Gm15952, Gjc1, Gjb4, Gm16096, S100a9, Scx, Sctr, Gal, Galnt18, Scrn1, Gas6, Gata2, Schip1, Scd1, Scamp5, Sbsn, Saxo2, Gchfr, Gcsam, Gdf15, Samd4, Samd14, Gemin4, Saa3, Ghr, S100g, Gm15956, Rnft2

Gap junction assembly, Gap junction trafficking and regulation, BDNF signaling pathway, Endochondral ossification, Electric transmission across gap junctions, FGFR2b ligand binding and activation, Tetrahydrobiopterin (BH4) biosynthesis, recycling, salvage and regulation, Gamma-carboxylation, transport, and amino-terminal cleavage of proteins, Glypican-3 pathway, Prolactin receptor signaling pathway

#### Negatively

Nhp2, Rpl4, Rpl8, Serbp1, Banf1, Cks1b, Npm1, Dut, Hsp90ab1, Hmgb2, Atp5a1, Hint1, Stmn1, Hnrnpab, Birc5, Cxcr6, Pdlim1, Hist1h2ao, Rgcc, Cdca3, Cct6a, Smc2, Ranbp1, Ncl, Cct5, Cct8, Snrpa1, Eef1d, Snrpd1, Cenpf, Cct7, Dkc1, Lsm4, C1qbp, Hspe1, Fkbp4, Dpy30, Ccnb2, Ybx3, Trbc2, Cd7, Adh5, Hspd1, Hist1h2ae, Tyms, Mrpl12, Eif2s2, Gars, Cd9, Cct3

Folding of actin by CCT/TriC\*, Cooperation of prefoldin and TriC/CCT in actin and tubulin folding\*, Association of TriC/CCT with target proteins during biosynthesis\*, Protein metabolism\*, Aurora B signaling\*, Protein folding\*, FOXM1 transcription factor network\*, Cell cycle\*, Myc active pathway\*, Pyrimidine biosynthesis\*



## Genes associated with SpatialPC2

### Positively

Rnft2, Ptpdc1, Pyroxd2, Pxdn, Fat1, Fbln2, Ptprn, Fbxl12os, Ptprg, Fbxw10, Fcna, Ptpn14, Fcor, Fcrls, Smim5, Ptk7, Ptgs2, Ptges, Fgf21, Fgf7, Fgfr1, Fgfrl1, Prx, Prtn3, Prss50, Prss36, Fam83h, Fam83e, Rab30, Rab36, Eml1, Emx2, Retnla, Retn, Reps2, En1, Eng, Reep6, Epb4113, Ephx3, Rbp2, Ereg, Etv1, Evc, Rasal2, Evc2, F3, F630040K05Rik, Fads2, Fam160a1

Type I interferon (interferon-alpha/beta) pathway, Melanoma, Eicosanoid biosynthesis, Eicosanoid metabolism, FGFR ligand binding and activation, Fibroblast growth factor receptor pathway, FRS2-mediated cascade, Negative regulation of FGFR signaling, Signaling by FGFR mutants, Phospholipase C-mediated cascade

### Negatively

Gm42418, Gm26917, AY036118, Serpinb9, Tg, Sdf4, Tnfrsf4, Nfkbia, Tnfrsf18, Rel, Lgals7, Hilpda, Mir155hg, Serpinb6b, Gadd45b, Trac, Cd200, Tnfrsf9, Dusp2, Cd2, Il5, Zap70, Gm19585, Arap2, Icos, Cdkn1a, Csf2, Dusp4, Sh2d1a, Ms4a4b, Rilpl2, Tnfsf11, Lck, Cd6, Cyp51, Gimap5, Cct8, Ak2, Gimap6, Sdcbp2, Bhlhe40, Cd4, Zbtb32, Ifitm1, Eprs, Rgs16, Traf1, Camk4, Acot7, Ccl1

T cell receptor signaling pathway\*, T cell receptor regulation of apoptosis\*, Interleukin-2 signaling pathway\*, Immune system\*, PD-1 signaling\*, Primary immunodeficiency\*, Generation of second messenger molecules\*, Adaptive immune system\*, Cytokine-cytokine receptor interaction\*, Lck and Fyn tyrosine kinases in initiation of T cell receptor activation\*

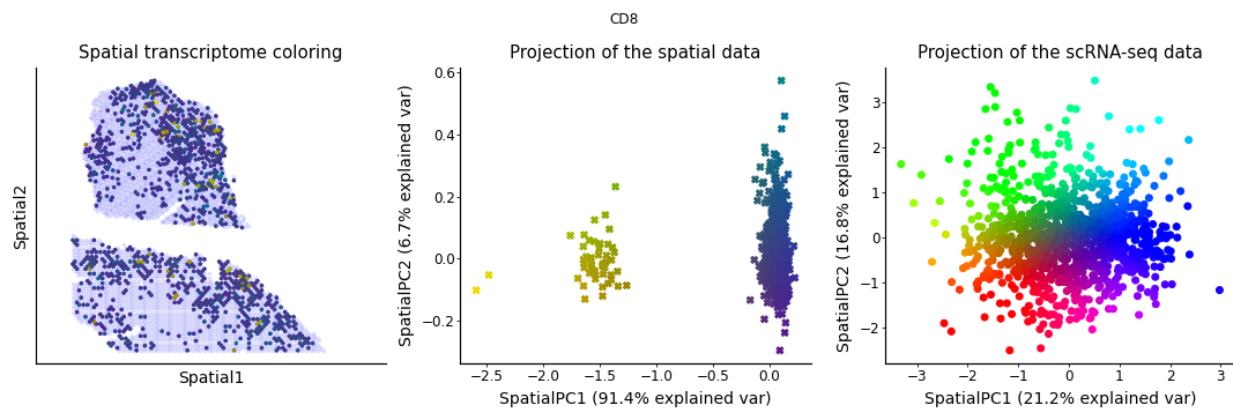

## Genes associated with SpatialPC1

### Positively

C630043F03Rik, Meis2, Gas6, Mcpt8, Gas1, Gap43, Mefv, Ccl11, Meikin, Meis1, Galnt18, Shroom4, Mfap3l, Mfap4, Mfsd7a, Serpine1, Serpind1, Gal, Mgl1, Serpinb2, Shroom3, Siglecg, Cd163, Ccdc106, Gli3,

Slc27a3, Gjc1, Gjb4, Slc22a23, Slc22a18, Cbr2, Map3k9, Slc13a3, Siglech, Ccdc142os, Gfra2, Gdf3, Ccdc151, Gdf15, Gchfr, Gbp2b, Gata2, Mgst1, Mid2, B3gnt9, Rtkn, S1pr3, S100g, S100a9, S100a8

Fibroblast growth factor 1\*, Oncostatin M\*, Dissolution of fibrin clot\*, BDNF signaling pathway, Fibrinolysis pathway, Gap junction assembly, Blood clotting cascade, Endogenous Toll-like receptor signaling, Gap junction trafficking and regulation, Gastrin pathway

#### Negatively

Isg20, Ifit3, Usp18, Bst2, Ly6a, Gzmb, Rsad2, Ifit1, Ifit1bl1, Igtf, Gbp2, Irgm1, Ifit3b, Jaml, Ifi208, Ifit2, Ifih1, Slfn5, Phf11c, Cxcl10, Cmpk2, Plac8, Cd8a, Ifi214, Tnp2, Iigp1, Socs1, Slamf7, Tnfrsf9, Cd69, Samd9l, Hspa5, Mcm2, AW112010, Tuba1b, Cxcr6, Fen1, Ly6c2, Mcm6, Il12rb1, Ctla2a, Spc24, Ccrl2, Pmepa1, Sh2d2a, Top2a, Lig1, Cd8b1, Lag3, Ctsw

Interferon alpha/beta signaling\*, Interferon signaling\*, DNA strand elongation\*, Immune system signaling by interferons, interleukins, prolactin, and growth hormones\*, Interleukin-12-mediated signaling events\*, Interleukin-4 regulation of apoptosis\*, Immune system\*, DNA replication\*, S phase\*, Type II interferon signaling (interferon-gamma)\*

#### Genes associated with SpatialPC2

##### Positively

Nrep, Cep295nl, Gas1, Ces1g, Slc27a3, Gas6, Ddr2, Gata2, Slc22a23, Slc22a18, En1, Misp, Gbp2b, Slc13a3, Emx2, Pbp2, Kynu, Mirt2, Gm20655, Cfap69, Cfh, Dpep3, Gm9967, Pak3, Anxa8, Gap43, Gm26797, Slc9a4, Chst3, Paqr5, Chrd, Apol6, Aplnr, Slc6a17, Slc6a13, Parva, Slc4a3, Slc40a1, Slc39a2, Pcdh7, Siglech, Sdsl, Siglecg, Lbx1, Mylk, Serpinb2, Asap3, Gfra2, Asb11, Gm20005

SLC-mediated transmembrane transport\*, Transport of glucose and other sugars, bile salts and organic acids, metal ions and amine compounds\*, Transmembrane transport of small molecules\*, Metal ion solute carrier family (SLC) transporters, Gastrin pathway, SIDS susceptibility pathways, Sodium-coupled sulphate, di- and tri-carboxylate transporters, Gastric acid secretion, Cytoskeletal remodeling regulation and cell spreading by IPP complex components, Dissolution of fibrin clot

##### Negatively

Gzma, Ifit1, Gzmb, Ifit3, Slfn5, Ccl5, Serpinb9, Igtf, Rsad2, Ifit1bl1, Ifit3b, Mxd1, Socs1, Ly6c2, Usp18, Serpinb6b, Ifi208, Ccnd2, Ifih1, Bst2, Gbp2, Isg20, AW112010, Oasl1, Klra9, Klrk1, Cmpk2, Samd9l, Tcrg-C4, Iigp1, Klre1, Ifi214, Klrb1c, Tcrg-C2, Ccrl2, Gm34342, Ly6c1, Kcnj8, Fasl, Klra1, Tmem140, Arhgef5, Cish, Sult2b1, Irgm1, Klra5, Jaml, Dgat1, Ifit2, Zfp628

Interferon alpha/beta signaling\*, Interferon signaling\*, Immune system signaling by interferons, interleukins, prolactin, and growth hormones\*, Interleukin-9 regulation of target genes\*, Immune system\*, Granzyme A-mediated apoptosis pathway\*, Interleukin-4 regulation of apoptosis, Interleukin-12-mediated signaling events, Interleukin-2 signaling pathway, Interferon alpha signaling

## regulation

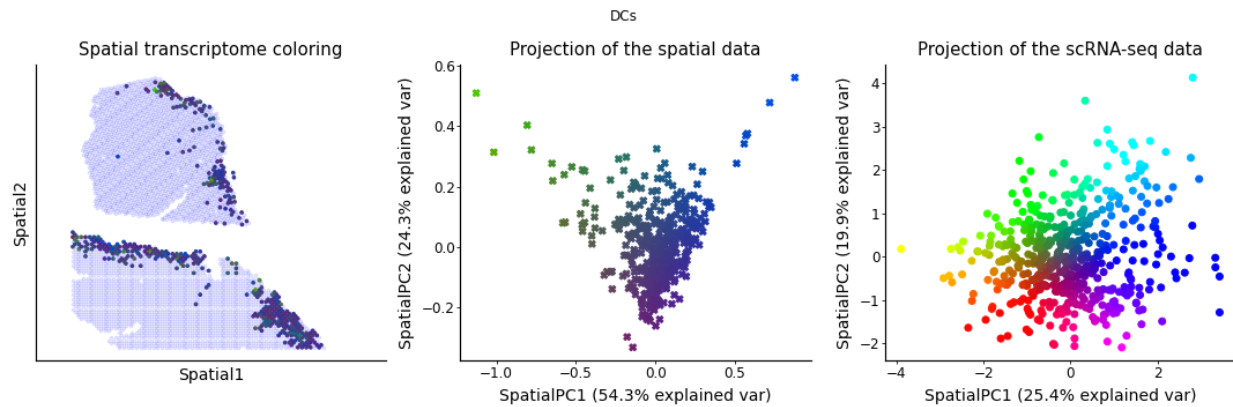

## Genes associated with SpatialPC1

### Positively

Cd3d, Npy, Nyap1, Cdr2l, Nupr1l, Nudt12, Nuak1, Ntrk3, Cep295nl, Nsg2, Nrtn, Cep97, Nrn1, Nrep, Nrbp2, Npl, Platr3, Ces1g, Cfap69, Cfap74, Nmnat2, Nlgn2, Ninj2, Chrd, Chst2, Nid1, Nhsl1, Nhs, Ngf, Nfatc4, Cdo1, Cdh2, Cdh13, Ogn, Pla2r1, Cd160, Pitx1, Pik3r3, Pif1, Cd163l1, Phex, Phactr1, Pglyrp2, Pgbd5, Perp, Penk, Pdzk1ip1, Pdgfra, Gm10505, Pcdhb7

Nicotinate and nicotinamide metabolism, Adherens junction actin cytoskeletal organization, Keratan sulfate/keratin metabolism, Neurotrophin signaling pathway, T cell receptor signaling pathway, ERBB2/ERBB3 signaling events, SHP2 signaling, Neurotrophic factor-mediated Trk receptor signaling, Glioma, ERK1/ERK2 MAPK pathway

### Negatively

Ifit3, Ifit1, Ifit2, Rsad2, Isg20, H2-Ab1, Ifit3b, AA467197, Ly6a, Phf11d, H2-DMb1, Cxcl10, Axl, Ifit1bl1, Cd74, H2-Aa, Tgm2, H2-Eb1, Samd9l, Igtp, Irgm1, Pnp, Cd72, Usp18, Oasl1, Cmpk2, Ifih1, Gbp2, Ifi208, Cd14, Ccnd2, Sectm1a, Slfn5, Il1rn, Ifi44, Spint1, Ifi205, Socs1, AU020206, Slfn4, Slfn9, Iigp1, Clec4n, Cdkn1a, Ccrl2, Slamf9, Ctsd, Rilpl1, Wfdc17, Hexb

Interferon alpha/beta signaling\*, Interferon signaling\*, Immune system signaling by interferons, interleukins, prolactin, and growth hormones\*, Immune system\*, Type II interferon signaling (interferon-gamma), Cyclins and cell cycle regulation, Interferon alpha signaling regulation, Leptin influence on immune response, Cyclin D-associated events in G1, Interleukin-4 regulation of apoptosis

## Genes associated with SpatialPC2

### Positively

Itga2b, Neb, Gm16283, Cdr2l, Cep295nl, Gm16253, Cep97, Serping1, Gm16104, Serpine2, Ces1g, Nefh, Cdo1, Gm15956, Serpinb2, Gm15952, Neu3, Nfatc4, Gm15634, Serp2, Cfp69, Cfp74, Sgcd, Sgip1, Gm10501, Shroom4, Ncald, Ncam1, Skap1, Gm1673, Six2, Cda, Sit1, Gm16556, Nckap5, Shroom3, Ndr4, Shox2, Gm16287, Cdc42ep5, Shisa4, Shf, Cdh13, Cdh2, Ncmap, Ncr1, Sept5, Ngf, Sema6a, Samd3

Arrhythmogenic right ventricular cardiomyopathy (ARVC), Adherens junction actin cytoskeletal organization, Signal transduction by L1, Signaling events mediated by PTP1B, Axon guidance, FGF signaling pathway, Axonal growth stimulation, Cell cycle negative regulation by p75 neurotrophin receptor, Activation of TRKA receptors, NADE-dependent death signaling

### Negatively

H2-DMb1, H2-Ab1, Rpl4, Cd209a, Lgals1, Rpl8, Ckb, Cd74, Wfdc17, Naaa, Anxa1, Ranbp1, Ccl6, Itgb7, Lyz2, Calr, Nop10, Selenop, Cd7, Clec10a, Nhp2, Ighm, Eif5a, Apex1, Ramp1, Ccl9, H2-Aa, Egr1, Eif4ebp1, Sell, Mgst3, Hnrnpab, Hint1, Ifitm6, Abca9, Nop16, H2-Eb1, Plac8, Cd209d, Cyb5a, Bcl11a, Kmo, Cdkn2d, Nop58, Ank, H13, Mrc1, Parvg, F13a1, Atp5a1

Protein metabolism, Interleukin-9 regulation of target genes, T cell receptor regulation of apoptosis, Adaptive immune system, Influenza infection, Translation, EGFR1 pathway, Translation factors, Immune system, Cycling of Ran in nucleocytoplasmic transport

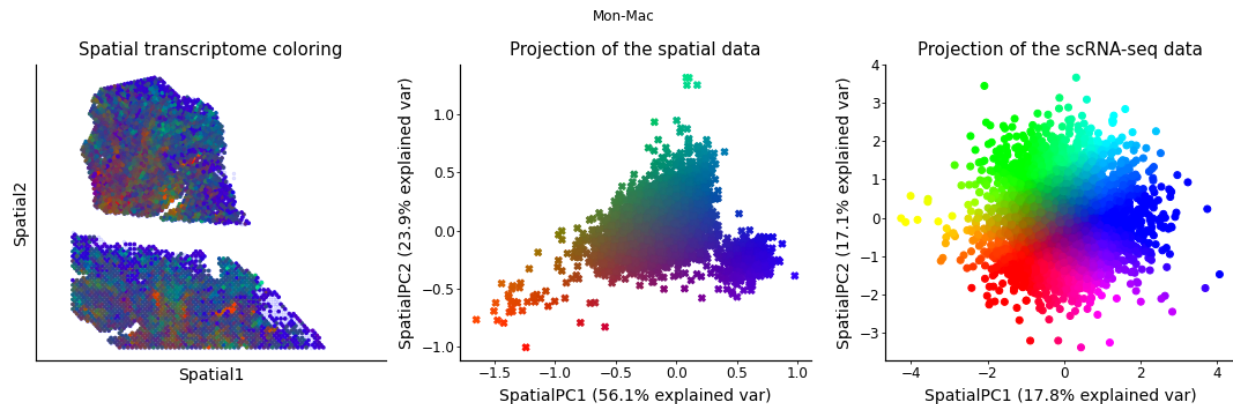

## Genes associated with SpatialPC1

### Positively

Dzip1, Perp, Ypel4, Hemgn, Pdzd4, Upk1a, Kcnj8, 2700069I18Rik, D630039A03Rik, Shroom3, Naalad2, Sv2c, Cfp69, Ptprg, Fam71b, Nbl1, Ncald, Nckap5, Aknad1, Tmem150c, Gpha2, Lancl3, Ppp1r14c, Platr22, Lcn4, Efna2, Bmp7, Gjb4, Aqp3, Cd163l1, Chrd, Utf1, Sema6d, Gm11714, Muc20, Serp2, Ephb3,

A630023P12Rik, Ii5, Chst2, Nefh, Dmrta1, 1700001O22Rik, Rem2, Extl1, Arnt2, Gramd2, Mid2, Slc35f2, Klra1

ALK in cardiac myocytes, BMP receptor signaling, TGF-beta regulation of skeletal system development, Eosinophils in the chemokine network of allergy, Activation of calcium-permeable kainate receptor, Passive transport by aquaporins, ALK2 pathway, Hematopoiesis regulation by cytokines, Glycosaminoglycan biosynthesis: keratan sulfate, Other semaphorin interactions

#### **Negatively**

Gm42418, Gm26917, Thbs1, Pf4, AY036118, Cd93, F13a1, Ms4a7, Abca1, Ctsl, Emp1, Apoe, Cxcl3, Adam8, Spp1, Hilpda, Ctsd, Folr2, Mafb, Nceh1, Rnase4, Pbbp, Pmp22, Mxd1, Syng1, Fcrls, Arg1, Ninj1, Gpnm1, Stab1, Ccl7, Fabp5, Tcf4, Ccl9, Rgs1, Ccl2, Ms4a14, Cxcl2, Tspan3, Ecm1, Tmem37, Rsad2, Ctla2b, Filip1l, Gstm1, Olfml3, Cbr2, Ddah2, Cd63, Sox4

Binding of chemokines to chemokine receptors\*, Interleukin-4 regulation of apoptosis\*, Interleukin-1 regulation of extracellular matrix\*, Response to elevated platelet cytosolic calcium\*, Chemokine signaling pathway\*, Peptide G-protein coupled receptors\*, Alpha-9 beta-1 integrin pathway\*, Cytokine-cytokine receptor interaction\*, Interleukin-7 interactions in immune response\*, Oncostatin M\*

#### **Genes associated with SpatialPC2**

##### **Positively**

Extl1, Ypel4, Cfap69, Chrd, Gjb4, Apol10b, Hemgn, Akr1c14, Klra1, Gm11714, Muc20, Serp2, Tff1, Klra5, Aknad1, Ii5, Sema6d, Nrtn, Ptprg, Kcnj8, Perp, Fam71b, Upk1a, Fgf21, B930095G15Rik, Naalad2, Scin, Nckap5, Utf1, Nbl1, Rem2, Ncald, Bmp7, Nefh, 1700001O22Rik, Ankrd6, Dzip1, Slc6a17, Platr22, Lurap1, A630023P12Rik, Shroom3, Arnt2, Slc35f2, Pdzd4, D630039A03Rik, Dmrta1, Dapl1, Sv2c, Mid2

ALK in cardiac myocytes, BMP receptor signaling, Endochondral ossification, TGF-beta regulation of skeletal system development, Eosinophils in the chemokine network of allergy, Activation of calcium-permeable kainate receptor, ALK2 pathway, Hematopoiesis regulation by cytokines, Other semaphorin interactions, Glycosylphosphatidylinositol (GPI) biosynthesis

##### **Negatively**

Ccl6, Lyz2, Pf4, F13a1, Ccl9, Fn1, Cd14, Cxcl2, Thbs1, Lyz1, Cd93, Ctsl, Hp, Cxcl3, Ctsd, Pbbp, Mt1, Clec4n, Rpl4, Hilpda, Ninj1, Spp1, Vat1, Lmna, Rpl8, Fam20c, Cd36, Igfbp4, Selenop, Pdlim1, Emp1, Cbr2, Folr2, Akr1b8, Nhp2, Sdc1, Mrc1, Mmp8, Mcemp1, Cd9, Abca1, Areg, Gja1, Slc7a11, Igfbp6, Tspan3, Clec4e, Gcsh, Ear2, Lima1

Response to elevated platelet cytosolic calcium\*, Beta-1 integrin cell surface interactions\*, Platelet activation, signaling and aggregation\*, ECM-receptor interaction\*, FSH regulation of apoptosis\*, Beta-3 integrin cell surface interactions\*, Interleukin-4 regulation of apoptosis\*, Binding of chemokines to

chemokine receptors\*, Hemostasis pathway\*, Alpha-9 beta-1 integrin pathway\*

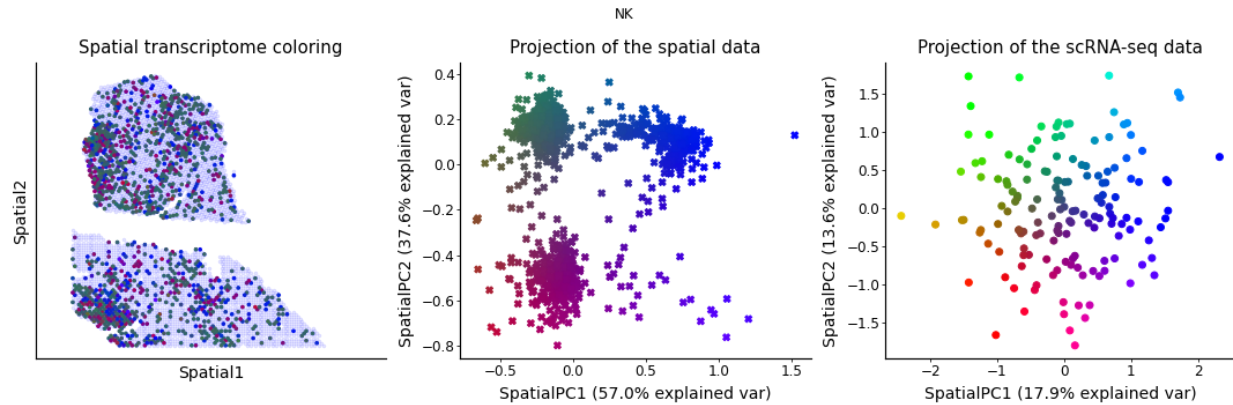

## Genes associated with SpatialPC1

### Positively

Zscan20, Laptm4b, Ccnf, Kremen2, Ccne2, Ksr1, Kyat1, Kynu, Ccne1, Lactb, Lad1, Lamc2, Lancl3, Ccnb2, Kctd14, Ccna2, Lca5l, Lcn2, Ccl11, Lhx6, Lhx8, Ccl1, Ccdc80, Lins1, Lipg, Lix1l, Kntc1, Ccno, Kmo, Ccr10, Kdm8, Kdr, Kif11, Kif15, Kif18a, Kif20a, Kif20b, Kif21a, Kif2c, Kif4, Kifc1, Kitl, Klc3, Klhdc8b, Klhl15, Klhl23, Klhl32, Klhl35, Klk1, Klra17

Kinesins\*, Factors involved in megakaryocyte development and platelet production\*, MHC class II antigen presentation\*, Cell cycle\*, G0 and early G1 pathway\*, M phase pathway\*, FOXM1 transcription factor network\*, Hemostasis pathway\*, DNA replication\*, p53 activity regulation\*

### Negatively

Gzmc, Syngn1, Mgst3, Gtf2i, Ccl12, Eif3b, Tbc1d7, Axl, Emp1, Thbs1, Cald1, Lhfp, Crabp1, Src, Sgce, Prdx4, Exoc3l4, Cdh13, Nt5dc2, Eml1, Fbxo36, Dut, Mt1, Srm, H1f0, Tcf4, Gja1, Rhoc, Cnn3, Arl2, Mmp9, Apex1, Ranbp1, Tmem176b, Mcm4, Anxa1, Fam216a, 9530082P21Rik, Cd81, Stab1, Mvk, C1qc, Ccl7, Kcnk5, Tppp3, Sdr39u1, Scd2, Mcm5, Desi2, Gmcs

Unwinding of DNA, CDK regulation of DNA replication, ID regulation of gene expression, Angiogenesis, Signaling events mediated by PRL, Gap junction trafficking and regulation, Activation of the pre-replicative complex, DNA strand elongation, Syndecan 4 pathway, CXCR4 signaling pathway

## Genes associated with SpatialPC2

### Positively

Zscan20, Npy, Nr2f1, Nr2f2, Fam3b, Fam229b, Fam20c, Nrpb2, Nrep, Nrg1, Nrn1, Fam187b, Fam178b, Nrtn, Nsg2, Fam174b, Fam161a, Nthl1, Fam160a1, Fam129c, Fahd1, Nr2c1, Fam71b, Fah, Npl, Nlgn2,

Fbxo32, Fbxo2, Fbxl12os, Nnmt, Nnt, Fbn1, Fbln2, Fat1, Fam83h, Fam83g, Fam83e, Fam83d, Fam83a, Nos2, Nos3, Noxo1, Fam71e1, Npdc1, Nuak1, Nudt12, Msantd1, Extl1, Oscp1, Evc2

Nicotinate and nicotinamide metabolism\*, Nitric oxide effects, Mechanism of gene regulation by peroxisome proliferators via PPAR-alpha, Ghrelin pathway, Nitric oxide stimulation of guanylate cyclase, Latent infection of Homo sapiens with Mycobacterium tuberculosis, Nuclear receptors, Interleukin-4 regulation of apoptosis, Nuclear receptor transcription pathway, Arginine and proline metabolism

### Negatively

Ptprcap, AY036118, Atad2, Gm26917, Flt3l, Gm42418, Selenoh, Klra7, Cd7, Ick, S1pr5, Banf1, Dedd2, Asf1b, Ncr1, Ctla2b, Kcnj8, Nkg7, Rpa2, Ppp2r3a, Klhl11, Gm15283, G0s2, Icam2, Cd72, Grap, Herpud1, Tecpr2, Tmem121, Thbs3, Lcmt2, Lymr7, Krba1, Tab1, Arhgap27os1, Dtymk, Cdy12, Ears2, Samd3, Cd9, Gzmk, Vamp5, Dut, Cct3, Adh5, Slc29a1, Elp2, Smpd5, Cst7, Brca2

Homologous DNA pairing and strand exchange, Double-strand break repair, Homologous recombination, Tyrosine metabolism, Diurnally regulated genes with circadian orthologs, Meiotic recombination, 2-LTR circle formation, APOBEC3G-mediated resistance to HIV-1 infection, Flap intermediate removal from the telomere lagging strand (C-strand), Nucleotide metabolism

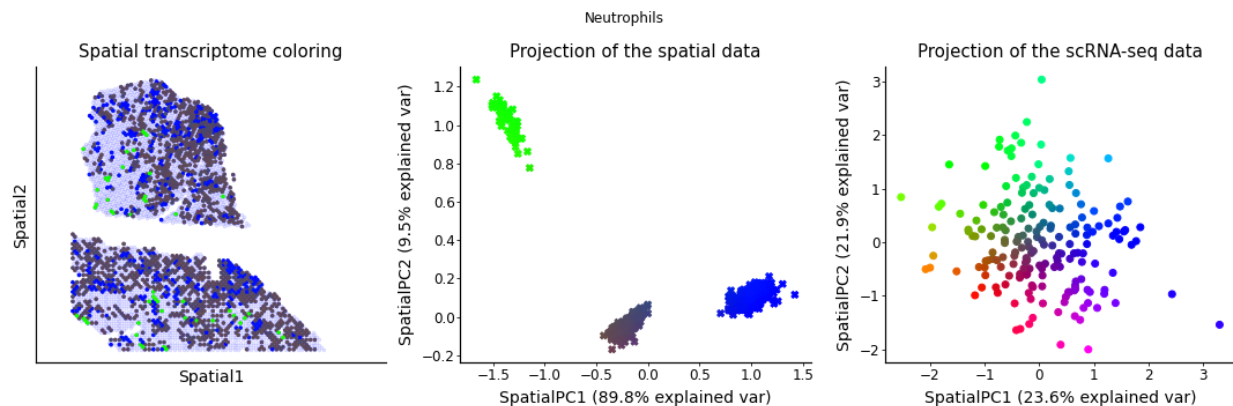

### Genes associated with SpatialPC1

#### Positively

Zscan20, Loxl4, Cxcl1, Cxadr, Lrig1, Lrp8, Lrr1, Lrrc24, Lrrc32, Lrrc51, Lrrc73, Cx3cl1, Cwc27, Cul7, Ctnn, Ltbp2, Ltbp4, Ctsw, Lurap1, Lurap1l, Ctsf, Ly6c1, Ctla4, Cstad, Ly6g5b, Cst6, Csrnp2, Lpar1, Loxl1, Lax1, Lncpint, Lbx1, Lca5l, Lck, Lclat1, Lcmt2, D130020L05Rik, Lcn4, D130017N08Rik, Cysltr2, Lgals7, Cyp7b1, Lhx6, Lhx8, Cyp4f17, Lig1, Cyp2r1, Lins1, Cyp1b1, Cxxc5

Cytochrome P450 pathway, Cytochrome P450 metabolism of endogenous sterols, Phase I of biological oxidations: functionalization of compounds, T cell activation co-stimulatory signal, CTLA4 inhibitory signaling, Adaptive immune system, Biological oxidations, Binding of chemokines to chemokine

receptors, Steroid hormone biosynthesis, Tryptophan metabolism

#### Negatively

Ccl6, Thbs1, Hilpda, Bgn, Gm26917, Snrpa1, Ankrd33b, Mtmr7, Gramd1c, Rrs1, Plxdc2, Mmp23, Rab30, Repts2, Gng11, Paip2b, Gata2, Fosl1, Ciart, Apoe, Rae1, Rgs1, Mcpt8, Spp1, Ndrgr1, Nedd4, Rit1, Tceal9, Cd63, Slc40a1, Avpi1, Id2, Msrb3, Tppp3, Gm42418, Itgb3, Ankrd1, Parva, 9330020H09Rik, Mad2l1, Tada2a, Il7r, Timp1, Fgfr1, Snhg6, Trmu, Rcn1, Cd93, Mt1, Vwa1

Response to elevated platelet cytosolic calcium, Platelet activation, signaling and aggregation, Beta-3 integrin cell surface interactions, BDNF signaling pathway, HIF-1 transcriptional activity in hypoxia, AP-1 transcription factor network, Osteoclast signaling, Hemostasis pathway, ECM-receptor interaction, Integrin cell surface interactions

#### Genes associated with SpatialPC2

##### Positively

Zscan20, Hspb1, Hpgd, Hpgds, Hrh1, Bcl2l14, Hsd17b7, Hsf2bp, Bcl11b, Hspa12b, Bcl11a, Bcdin3d, Bcat1, Bcas1, Bcar1, Hspb6, Hoxc10, Hspb7, Hspg2, Htra1, Htra4, Bard1, Bank1, Icam2, Ick, Icos, Bace2, Id3, BC055324, BC051142, Hoxc9, Hoxb3, BC049352, Bend5, Hist1h3e, Hist1h3g, Hist1h3h, Hist1h4b, Hist1h4c, Hist1h4d, Hist2h2ab, Hist2h2ac, Hist2h2bb, Hist3h2ba, Hist4h4, Hk1os, Hlf, Bdnf, Hoxa9, Hmgb3

Systemic lupus erythematosus\*, Type II interferon signaling (interferon-gamma)\*, EGFR1 pathway, Amyloids, RAGE pathway, Integrin cell surface interactions, BRCA1-dependent ubiquitin ligase activity, Valine, leucine and isoleucine biosynthesis, Adhesion and diapedesis of lymphocytes, Stress induction of HSP regulation

##### Negatively

Cxcl2, Ccr12, Cd14, Isg20, Ccl3, Il1a, Il1rn, Ccl4, Rsad2, Ier3, Ifit1, Usp18, Cdkn1a, Ifit3, Ninj1, Slfn4, Clec4n, Marcksl1, Ifit3b, Cxcl3, Slfn5, Tgm2, Irgm1, Ifi208, Spp1, Thbs1, Il1r2, Chac1, Dhfr, Chaf1a, Ankrd50, Gm14636, Ddx27, 4732465J04Rik, Ifit1bl1, Ddah2, Ifit2, Cd70, Kbtbd11, Pnp, Gbp2, Rnase6, Acod1, Cd9, Sod2, Cd74, Cdc34, Rasip1, E230032D23Rik, Gm13822

TNF-alpha effects on cytokine activity, cell motility, and apoptosis\*, Interleukin-1 regulation of extracellular matrix\*, Interferon alpha/beta signaling\*, Immune system signaling by interferons, interleukins, prolactin, and growth hormones\*, Interleukin-4 regulation of apoptosis\*, Immune system\*, Thymic stromal lymphopoietin (TSLP) pathway\*, Interferon signaling\*, Cytokine-cytokine receptor interaction\*, Binding of chemokines to chemokine receptors\*



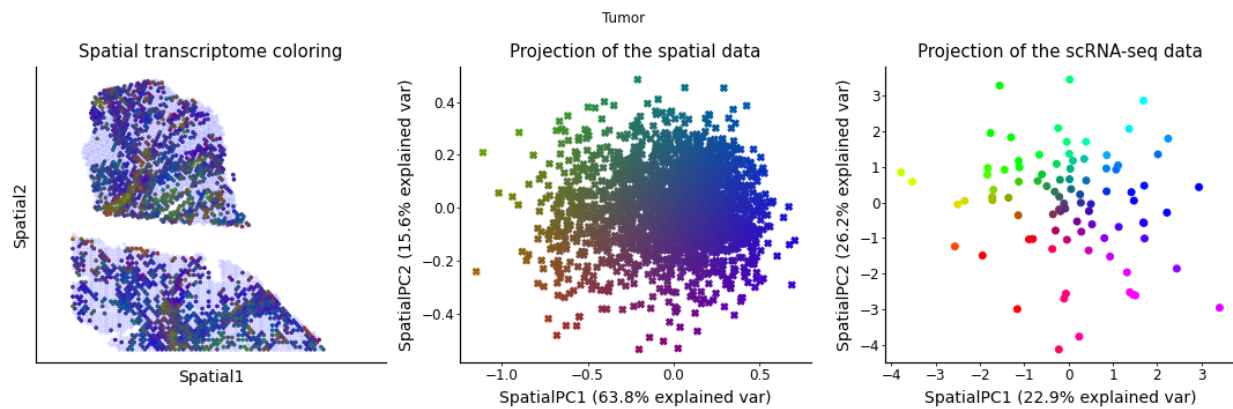

## Genes associated with SpatialPC1

### Positively

Zscan20, Gm16287, Scml4, Gm15708, Gm15747, Gm15787, Gm16008, Gm16096, Gm16253, Satb1, Gm16283, Gm16315, Gm15518, Gm16556, Samd3, Gm1673, Gm16845, S1pr5, S1pr4, Gm17455, Gm17745, Gm17767, Gm15634, Sct, D630039A03Rik, Gm12758, Gm10244, Gm10505, Gm10522, Gm11714, Gm12253, Sema6d, Gm12655, Gm12689, Gm12708, Gm13203, Sctr, Gm13391, Gm13546, Gm14010, Gm14029, Gm14167, Gm14207, Gm15056, Gm15270, Gm15473, Gm19585, Gm20069, Gm20627, Gm9967

Lysosphingolipid and lysophosphatidic acid (LPA) G-protein coupled receptors\*, S1P/S1P4 pathway\*, Glucagon-type ligand receptors, GPCR ligand binding, Class B GPCRs (secretin family receptors), Neuroactive ligand-receptor interaction, G alpha (s) signaling events, Other semaphorin interactions, Apoptotic cleavage of cellular proteins, Glycosylphosphatidylinositol (GPI) biosynthesis

### Negatively

Gstm2, Tbrg1, Anxa1, Cavin3, Apbb2, Usp18, Rcn3, Gnb4, Tcf4, Zbtb20, Enpp4, Prrx1, Tmem176b, Fstl1, Hoxc9, Cyb5r3, Hspa4l, H1f0, Cd9, Col6a1, Aebp1, Rhoc, Sdc2, Cand1, Sparc, Igtp, Gbp5, Plscr2, Nrp2, Mt2, Phf11d, Acat2, Irgm1, Efemp2, Gbp2, Apol9a, Maged1, Ifit3, Tubg1, Gstm1, Fkbp9, Mmaa, AW112010, Cdh13, ligp1, Ccnd2, Shisa4, Hspa1b, Mvk, Mxra8

Interferon alpha/beta signaling, Terpenoid backbone biosynthesis, Interferon signaling, Immune system signaling by interferons, interleukins, prolactin, and growth hormones, Glutathione metabolism, Neurophilin interactions with VEGF and VEGF receptor, TGF-beta regulation of extracellular matrix, Platelet activation, signaling and aggregation, G alpha (12/13) signaling events, Nuclear beta-catenin signaling and target gene transcription regulation

## Genes associated with SpatialPC2

### Positively

Zscan20, Serpinb9b, Siglecg, Gm26935, Gm27042, Gm28347, Gm28935, Gm29156, Sh2d2a, Sh2d1b1, Sh2d1a, Sgip1, Gm29243, Gm29361, Gm3716, Gm37170, Gm42997, Gm44053, Gm44867, Gm5129, Serpine2, Siglech, Sit1, Gm26902, Gm17455, Gm16253, Gm16283, Gm16287, Gm16315, Gm16556, Gm1673, Gm16845, Slc22a18, Gm17745, Gm26571, Gm17767, Slc15a2, Slc13a3, Gm19585, Gm20069, Gm20627, Gm20632, Gm26542, Gm568, Gm8013, Slc2a3, Gm807, Gsg1, Gstp3, Gstt2

Transport of glucose and other sugars, bile salts and organic acids, metal ions and amine compounds, SLC-mediated transmembrane transport, Sodium-coupled sulphate, di- and tri-carboxylate transporters, Vitamin C (ascorbate) metabolism, Organic cation transport, Transmembrane transport of small molecules, Vitamin C in the brain, Bile salt and organic anion SLC transporters, Facilitative sodium-independent glucose transporters, Organic cation/anion/zwitterion transport

### Negatively

Gm42418, AY036118, Gm26917, Spin4, Hist1h1e, Dkc1, Col7a1, 4930581F22Rik, Adh7, Enpp2, Schip1, Cby1, Armc6, Zfhx4, Cwc27, Epb41l4a, Zfp948, Smc1a, Bicd1, Cdc42bpa, Rpusd3, Zeb1, Dnajc9, Gzf1, Miga2, Fbln2, Ktn1, Stamos, Tmem47, Rrs1, Emp2, Anp32b, Cald1, Inpp4b, Huwe1, Appbp2os, Gm11131, 1700001O22Rik, Cdh2, Nol12, F730043M19Rik, Cenpe, Orc1, Morc4, Nexn, Cdc25a, Plod2, Mrps35, Ppid, Gm26586

E2F-enabled inhibition of pre-replication complex formation, G1/S-specific transcription, E2F-mediated regulation of DNA replication, G2/M checkpoints, Mitotic prometaphase, Cell cycle, ATM pathway, Collagen biosynthesis and modifying enzymes, G1 to S cell cycle control, Cyclin B2-mediated events

## Supplementary Note 3: a spatially-regularized DestVI

### Adding spot locations as side information in DestVI

While DestVI is specifically designed around spatial transcriptomics data, it does not directly leverage the spatial covariates  $\lambda$  to predict cell-type proportions  $\pi$ . In principle, modeling spatial variations at the spot level with Gaussian processes is feasible. Gaussian processes have been applied in other contexts of spatial transcriptomics analyses (e.g., SpatialDE [99], SVCA [100]), but not for this particular problem. There are two possible explanations for this. The first reason is purely technical: building a Gaussian process model outside of basic regression settings with Gaussian likelihood is hard [66]. The second reason is related to our knowledge of the smoothness of the spatial distribution of cells. Indeed, the idea that cells next to each other should have similar proportions is valid, but a bit simplistic. Indeed, many tissues are highly structured, organized in discrete layers rather than smooth transitions.

We have therefore designed a simple extension of DestVI, in which we enforce smoothness for the cell-type proportions in the tissue. Because, spatial transcriptomics simulation framework explicitly models cell-type proportions as spatially smooth, this data is a natural starting point to understand how to extend DestVI to encourage information sharing between parameters in neighboring spots in a scenario where the influence of spatial covariates is controlled. To do so, we introduce a regularized objective function  $L'(\lambda)$ ,

$$L'(\lambda) := L + \sum_{s,s' \in N(s)} \lambda \|\beta_s - \beta_{s'}\|^2,$$

Where  $L$  is the original objective function of DestVI,  $\lambda$  is a regularization strength hyperparameter and  $N(s)$  denotes the set of neighboring spots of  $s$  (in the experiments, the 4-nearest neighbors). We note that each contribution  $\lambda \|\beta_s - \beta_{s'}\|^2$  to this penalization shrinks the cell-type abundance  $\beta_s$  of every spot  $s$  toward the average of its neighbors. Consequently, the penalization aims at encoding a prior assumption that the cell-type proportions in adjacent spots should be related. To be beneficial, the regularization procedure implicitly assumes some knowledge on the spatial structure, represented by  $\lambda$ . In particular, a too strong regularization could be detrimental in contexts where cell proportions in some areas of the studied tissue are very loosely correlated.

## Searching for hyperparameters with held-out genes results on simulations

We propose an empirical solution to determine the prior strength  $\lambda$  based on held-out data. Although a natural approach to select hyperparameters consists in splitting the spots for spatial cross-validation, this is not applicable here because the parameters influences the cell-type abundance  $\beta$ , which are spot-specific. As an alternative, we propose to split the genes into a training gene set  $G_{train}$  and a testing gene set  $G_{test}$ . For this splitting to be representative of the different gene modules, we cluster genes based on Hotspot applied to the single-cell data and randomly assign genes to  $G_{train}$  and  $G_{test}$ , such that these sets approximately have equal size.

For a candidate regularization strength  $\lambda$ , we operate as follows. First, we train DestVI using the regularized objective function  $L'(\lambda)$  on the training counts  $X_{G_{train}}$ . During this step, we learn the generative model parameters (the cell type abundance parameters  $\beta$ , and the biases  $\alpha_{G_{train}}$ ) as well as the inference network parameters. Second, with  $\beta$  fixed, we fit the gene-specific parameters of the

model  $\alpha_{G_{test}}$  from observations  $X_{G_{test}}$ . We report the reconstruction error after training, on the set of held-out genes.

## Results on simulations

We report the held-out reconstruction error, as well as performance for cell-type proportion prediction for DestVI, and the spatially-aware variant for different strength parameters. We noticed that the performance for gene expression imputation is stable (unreported).

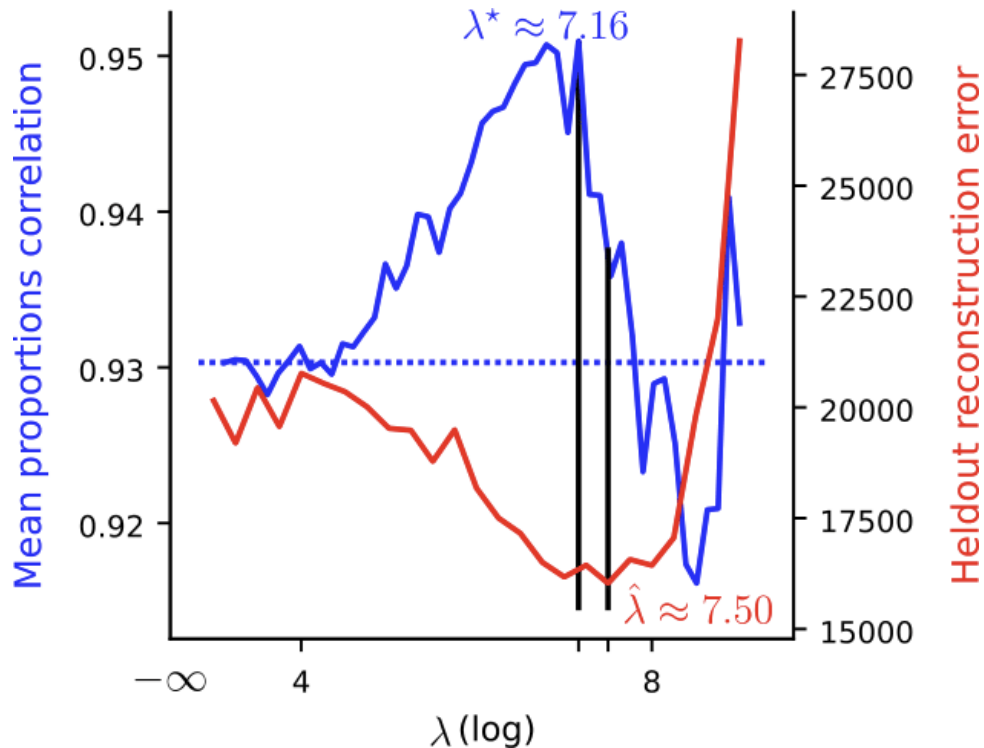

Figure: Spatial prior strength selection. Held-out reconstruction used for selection (red) with ground-truth average Spearman correlation of proportions with ground-truth (blue). The  $\lambda$  selection relies on a grid of 25 values on a logarithmic scale, ranging from  $10^3$  to  $10^{10}$ . The dashed blue line corresponds to the mean proportion correlation without spatial prior ( $\lambda = 0$ ).  $\hat{\lambda}$  and  $\lambda^*$  denote the associated optima.

We first observe that a broad range of regularization improves proportions prediction over the regular DestVI model (increase of correlation from 0.93 to 0.95), but too high values decrease performance. Our procedure picks a prior strength with an improved correlation over the baseline, and that closely matches the optimal  $\lambda$  value. Therefore, our described procedure helps select a prior that improves the proportions prediction.
